# Supplementary material
Source: publisher figshare collection journal article supplement (https://sage.figshare.com/ndownloader/files/17823035)
Supplement: Supplementary file 1 [file 17823035]

## Sheet: gProfiler
#	signf	p-value	T	Q	Q&T	Q&T/Q	Q&T/T	term ID	t type	t group	t name	t depth	Q&T list
1	!	0.0288	2846	993	175	0.176	0.061	GO:0044085	BP	19	cellular component biogenesis	1	KAT2B,PCNT,SRR,KPNB1,NACC1,PSMC3,ANGPTL4,DAXX,IKZF4,MCM2,CALR,AQP1,LETM1,PRKACA,FBLIM1,PPP2R1A,CAV1,MID1IP1,CLSTN3,RPS18,BMP7,FUZ,MLKL,ABCA1,BIK,EXOSC10,SRSF1,ATP6V0A1,SGK1,ARG1,MICU1,CABIN1,1810043G02RIK,HSPA4,PSMC5,PECAM1,OCLN,HMGCR,HACL1,CHRNA2,C9,NDUFB9,CLDN1,IL1RAP,PLEC,CEP97,HRG,APP,EIF2AK2,RPS14,ATG2A,HPS1,CUTC,NDUFB8,RPS24,PTPRJ,BAIAP2,FARP1,TK1,CPEB1,PARD3,ACADL,XRCC5,FARSB,NFASC,AHCTF1,…
1	!	0.00912	263	993	30	0.03	0.114	GO:0033500	BP	7	carbohydrate homeostasis	1	PRKACA,GPRC5B,PDK4,CRY1,NR1D1,HMGCR,RBP4,MAP4K4,IGFBP5,MPC2,GCLM,SESN2,ATG7,NOX4,STX4A,SMARCA4,CEBPA,PIK3R1,GCK,PRKCE,LEPR,LGALS1,RAP1A,MUP11,G6PC,MUP18,MUP16,MUP9,FCOR,MUP12
1	!	0.00844	262	993	30	0.03	0.115	GO:0042593	BP	7	glucose homeostasis	2	PRKACA,GPRC5B,PDK4,CRY1,NR1D1,HMGCR,RBP4,MAP4K4,IGFBP5,MPC2,GCLM,SESN2,ATG7,NOX4,STX4A,SMARCA4,CEBPA,PIK3R1,GCK,PRKCE,LEPR,LGALS1,RAP1A,MUP11,G6PC,MUP18,MUP16,MUP9,FCOR,MUP12
1	!	0.0206	168	993	22	0.022	0.131	GO:0001678	BP	7	cellular glucose homeostasis	3	PRKACA,NR1D1,HMGCR,MAP4K4,MPC2,GCLM,ATG7,NOX4,STX4A,SMARCA4,PIK3R1,GCK,PRKCE,LEPR,LGALS1,RAP1A,MUP11,MUP18,MUP16,MUP9,FCOR,MUP12
1	!	0.0431	5234	993	293	0.295	0.056	GO:0042221	BP	8	response to chemical	1	KAT2B,LGALS9,SP1,SRR,DDT,IL16,SMO,PSMC3,DAXX,MCM2,INMT,SLC25A1,CALR,PHB2,AQP1,NDRG1,PRKACA,POR,NR1I3,SLC5A6,CAV1,BMP7,RARRES2,DMAP1,SLC3A2,WNT2,FUZ,SLC41A1,DNAJB9,SLC25A13,ABCA1,STEAP2,MAPKAPK2,SLC22A5,PELP1,SLC25A22,PDK4,UBXN6,LRP11,SGK1,ARG1,CRY1,AVPR1A,MKNK2,NFYB,SLC36A1,TNIP1,BTG2,SREBF1,NAMPT,NCOA1,PXDN,PSMC5,NR1D1,STAT5B,FOS,SLC25A29,TRAF3,GPLD1,AAED1,TERT,XRCC4,OCLN,HMGCR,DHFR,CHRNA2,BNIP3…
1	!	3.12e-12	1609	993	144	0.145	0.089	GO:1901700	BP	8	response to oxygen-containing compound	2	KAT2B,LGALS9,SP1,SRR,SMO,CALR,PHB2,AQP1,PRKACA,POR,CAV1,BMP7,RARRES2,DMAP1,ABCA1,MAPKAPK2,PDK4,LRP11,SGK1,ARG1,CRY1,AVPR1A,TNIP1,BTG2,SREBF1,NCOA1,NR1D1,STAT5B,FOS,GPLD1,HMGCR,DHFR,PPARA,RANGAP1,CLDN1,CYC1,ARSA,APP,PIM1,CBS,EIF2AK2,RELA,RBP4,DNTT,BAIAP2,RPTOR,CPEB1,MAP4K4,IGFBP5,XRCC5,AGXT,MPC2,EPRS,MRC1,NR4A2,PSMD14,ABCA2,GATM,CRLS1,CAR3,PMVK,PDGFC,ZBTB7B,NTRK1,GCLM,RORC,PDE4B,SESN2,CASP9,SLC25A…
1	!	1.58e-05	345	993	42	0.042	0.122	GO:0001101	BP	8	response to acid chemical	2	PHB2,AQP1,ABCA1,PDK4,LRP11,ARG1,AVPR1A,SREBF1,NCOA1,DHFR,CLDN1,CBS,RELA,RBP4,BAIAP2,RPTOR,CPEB1,XRCC5,CRLS1,PDGFC,NTRK1,GCLM,SESN2,MTHFR,ASNS,ABCG2,ATG7,HSD17B2,LDLR,CTSH,LEFTY1,BMP6,IGFBP2,ABCB4,ZC3H12A,PRKCE,GJB2,KRT8,NTRK2,CFL1,PTK2B,TRP53
1	!	5.29e-07	1021	993	92	0.093	0.09	GO:0042493	BP	8	response to drug	2	SRR,DAXX,SLC25A1,CALR,AQP1,POR,SLC5A6,CAV1,DMAP1,SLC25A13,ABCA1,SLC22A5,SLC25A22,ARG1,SLC36A1,SREBF1,NCOA1,FOS,SLC25A29,GPLD1,HMGCR,DHFR,CHRNA2,PPARA,CLDN1,ARSA,NR1I2,CBS,RELA,RBP4,DNTT,BAIAP2,XRCC5,NR4A2,TOR1A,KYNU,PSMD14,ABCB11,LRP2,SORD,CRLS1,CAR3,NTRK1,GCLM,PDE4B,CYP4B1,CASP9,ABCB1B,MTHFR,ACTB,ASNS,ABCG2,ATG7,SLC25A15,SLC7A2,ETS1,NNMT,GSTA4,DNM2,SIGMAR1,SLC38A7,RPL10A,TXNIP,UQCRFS1,CAR14,IGFB…
1	!	1.11e-08	1088	993	101	0.102	0.093	GO:1901698	BP	8	response to nitrogen compound	2	KAT2B,SP1,SRR,PSMC3,DAXX,AQP1,POR,CAV1,BMP7,RARRES2,SLC3A2,DNAJB9,ABCA1,PDK4,UBXN6,SGK1,ARG1,CRY1,AVPR1A,BTG2,SREBF1,PSMC5,STAT5B,FOS,GPLD1,TERT,DHFR,PPARA,RANGAP1,SREBF2,CYC1,APP,CBS,RELA,RBP4,DNTT,BAIAP2,RPTOR,CPEB1,RHBDD1,IGFBP5,AGXT,EPRS,NR4A2,TOR1A,KYNU,GATM,CRLS1,ADAR,PDGFC,ZBTB7B,GCLM,VCP,PDE4B,SESN2,SLC25A33,MTHFR,ACTB,ASNS,ABCG2,ZC3HAV1,ATG7,NOX4,PSMC4,AQP8,RBM3,LDLR,NNMT,DNM2,BTG1,MYLIP…
1	!	0.013	548	993	49	0.049	0.089	GO:0009636	BP	8	response to toxic substance	2	DAXX,INMT,AQP1,DMAP1,ARG1,PXDN,FOS,AAED1,HMGCR,DHFR,CHRNA2,PPARA,CLDN1,ARSA,EIF2AK2,SLC23A1,RELA,RBP4,GSTO1,NR4A2,PSMD14,CAR3,NTRK1,GPX7,SESN2,ACTB,ASNS,ETS1,GSTA4,SRXN1,PPP1R9A,GSTT2,DNM2,SIGMAR1,RPL10A,TXNIP,CLDN5,ZC3H12A,PRKCE,S100A8,CFL1,CES1D,PTK2B,TRP53,PPP1R1B,GLYAT,MT-ND6,GGH,BNIP3
1	!	3.47e-10	3131	993	226	0.228	0.072	GO:0010033	BP	8	response to organic substance	2	KAT2B,LGALS9,SP1,SRR,SMO,PSMC3,DAXX,MCM2,CALR,PHB2,AQP1,PRKACA,POR,NR1I3,CAV1,BMP7,RARRES2,DMAP1,SLC3A2,WNT2,FUZ,DNAJB9,ABCA1,STEAP2,MAPKAPK2,PDK4,UBXN6,SGK1,ARG1,CRY1,AVPR1A,NFYB,TNIP1,BTG2,SREBF1,NAMPT,NCOA1,PSMC5,NR1D1,STAT5B,FOS,TRAF3,GPLD1,TERT,OCLN,HMGCR,DHFR,SQLE,PPARA,RANGAP1,TAB1,SREBF2,CLDN1,IL1RAP,CYC1,ARSA,ST3GAL6,NR1I2,HRG,EIF4A2,APP,KRT18,PIM1,CBS,EIF2AK2,RELA,RBP4,DNTT,FASN,CPN1,BA…
1	!	6.2e-08	935	993	89	0.09	0.095	GO:0033993	BP	8	response to lipid	3	LGALS9,SRR,SMO,DAXX,CALR,PHB2,AQP1,NR1I3,CAV1,BMP7,ABCA1,MAPKAPK2,PDK4,SGK1,ARG1,CRY1,AVPR1A,TNIP1,SREBF1,NCOA1,NR1D1,STAT5B,FOS,GPLD1,PPARA,CLDN1,NR1I2,PIM1,EIF2AK2,RELA,RBP4,CPN1,CPEB1,XRCC5,AGXT,MRC1,NR4A2,ABCA2,CRLS1,PMVK,RORC,PDE4B,CASP9,CLOCK,ABCG2,LTBR,TNFRSF1A,NFKBIB,HSD17B2,ETS1,SMARCA4,LDLR,KANK2,CTSH,TRIB1,SERPINE1,TXNIP,LEFTY1,UBE2L3,BMP6,IGFBP2,THBS1,FMO1,PIK3R1,ABCB4,ZC3H12A,PRKCE,I…
1	!	1.37e-08	1015	993	96	0.097	0.095	GO:0014070	BP	8	response to organic cyclic compound	3	SRR,SMO,DAXX,CALR,PHB2,AQP1,NR1I3,CAV1,BMP7,SLC3A2,ABCA1,SGK1,ARG1,CRY1,AVPR1A,BTG2,SREBF1,NAMPT,NCOA1,NR1D1,STAT5B,FOS,GPLD1,TERT,DHFR,PPARA,CLDN1,NR1I2,APP,PIM1,CBS,EIF2AK2,RELA,DNTT,CPN1,IGFBP5,AGXT,NR4A2,KYNU,ABCA2,CRLS1,BMP2,ADAR,PMVK,GCLM,RORC,PDE4B,CASP9,MTHFR,CLOCK,ACTB,ASNS,ABCG2,ZC3HAV1,ATG7,NOX4,AQP8,RBM3,ETS1,SMARCA4,KANK2,DNM2,CEBPA,TXNIP,UBE2L3,BMP6,IGFBP2,THBS1,DDX58,PIK3R1,ACACB,A…
1	!	0.0356	26	993	8	0.008	0.308	GO:0036314	BP	8	response to sterol	4	SMO,ABCA1,GPLD1,ABCA2,PMVK,RORC,INSIG1,HMGCS1
1	!	1.7e-08	958	993	92	0.093	0.096	GO:0010243	BP	8	response to organonitrogen compound	3	KAT2B,SP1,SRR,PSMC3,AQP1,POR,CAV1,BMP7,RARRES2,DNAJB9,ABCA1,PDK4,UBXN6,SGK1,ARG1,CRY1,AVPR1A,BTG2,SREBF1,PSMC5,STAT5B,FOS,GPLD1,DHFR,PPARA,RANGAP1,SREBF2,CYC1,APP,CBS,RELA,RBP4,DNTT,BAIAP2,RPTOR,CPEB1,RHBDD1,IGFBP5,AGXT,EPRS,NR4A2,TOR1A,KYNU,GATM,CRLS1,PDGFC,ZBTB7B,GCLM,VCP,PDE4B,SESN2,SLC25A33,MTHFR,ACTB,ASNS,ABCG2,ATG7,NOX4,PSMC4,AQP8,LDLR,NNMT,DNM2,BTG1,MYLIP,PIK3R1,SERPINA12,GCK,SHC1,PCSK9,PR…
1	!	0.000197	475	993	49	0.049	0.103	GO:1901652	BP	8	response to peptide	4	KAT2B,SP1,POR,CAV1,BMP7,RARRES2,PDK4,SGK1,ARG1,CRY1,AVPR1A,BTG2,SREBF1,STAT5B,GPLD1,PPARA,RANGAP1,CYC1,APP,RELA,RBP4,BAIAP2,CPEB1,IGFBP5,EPRS,NR4A2,GATM,ZBTB7B,SESN2,SLC25A33,ABCG2,BTG1,PIK3R1,SERPINA12,GCK,SHC1,PCSK9,GJB2,CFL1,TRP53,CXCL12,SORT1,JUND,MUP11,GGH,MUP18,MUP16,MUP9,MUP12
1	!	0.0455	257	993	28	0.028	0.109	GO:0009743	BP	8	response to carbohydrate	3	PRKACA,SREBF1,NR1D1,GPLD1,HMGCR,MAP4K4,MPC2,GCLM,SESN2,ATG7,NOX4,STX4A,SMARCA4,TXNIP,THBS1,GCK,PRKCE,LEPR,PTK2B,CALCRL,ACVR2B,LGALS1,RAP1A,MUP11,MUP18,MUP16,MUP9,MUP12
1	!	0.0208	233	993	27	0.027	0.116	GO:0034284	BP	8	response to monosaccharide	4	PRKACA,SREBF1,NR1D1,GPLD1,HMGCR,MAP4K4,MPC2,GCLM,SESN2,ATG7,NOX4,STX4A,SMARCA4,TXNIP,THBS1,GCK,PRKCE,LEPR,PTK2B,ACVR2B,LGALS1,RAP1A,MUP11,MUP18,MUP16,MUP9,MUP12
1	!	0.0108	225	993	27	0.027	0.12	GO:0009746	BP	8	response to hexose	5	PRKACA,SREBF1,NR1D1,GPLD1,HMGCR,MAP4K4,MPC2,GCLM,SESN2,ATG7,NOX4,STX4A,SMARCA4,TXNIP,THBS1,GCK,PRKCE,LEPR,PTK2B,ACVR2B,LGALS1,RAP1A,MUP11,MUP18,MUP16,MUP9,MUP12
1	!	0.00765	221	993	27	0.027	0.122	GO:0009749	BP	8	response to glucose	6	PRKACA,SREBF1,NR1D1,GPLD1,HMGCR,MAP4K4,MPC2,GCLM,SESN2,ATG7,NOX4,STX4A,SMARCA4,TXNIP,THBS1,GCK,PRKCE,LEPR,PTK2B,ACVR2B,LGALS1,RAP1A,MUP11,MUP18,MUP16,MUP9,MUP12
1	!	2.06e-08	3444	993	236	0.238	0.069	GO:0065008	BP	8	regulation of biological quality	1	SCPEP1,KAT2B,SNAPIN,LGALS9,SP1,SMO,ANGPTL4,CYP17A1,CALR,PHB2,AQP1,LETM1,PRKACA,POR,FBLIM1,RPS9,GCAT,CAV1,CLSTN3,CARHSP1,GPRC5B,OIT3,PLIN5,RPS5,SLC41A1,ABCA1,STEAP2,HSD11B1,MAPKAPK2,EXOSC10,SLC22A5,ATP6V0A1,PDK4,SGK1,CRY1,MICU1,AVPR1A,1810043G02RIK,IGFBP3,SREBF1,NCOA1,PECAM1,TEN1,TMIGD1,NR1D1,STAT5B,TERT,HMGCR,PLAU,CHRNA2,BNIP3L,PPARA,RANGAP1,MYH9,SREBF2,CLDN1,IL1RAP,GPIHBP1,HRG,APP,PARP3,CBS,STAR…
1	!	0.000158	515	993	52	0.052	0.101	GO:0010817	BP	8	regulation of hormone levels	2	SCPEP1,CYP17A1,AQP1,POR,HSD11B1,CRY1,IGFBP3,SREBF1,NR1D1,STAT5B,HMGCR,RBP4,CPN1,SIRT3,MAP4K4,MPC2,HSD17B7,FAM129B,LRP2,HSD17B12,BMP2,SCHIP1,CLOCK,SULT1B1,HSD17B11,ATG7,STX4A,SERPINA7,FGFR1,HSD17B2,DIO1,AKR1D1,BMP6,ABCB1A,GCK,ADORA1,PRKCE,HCAR2,VAMP8,ARNTL,RETSAT,IDE,LEPR,DHCR7,ACVR2B,CYP2D22,RDH11,MUP11,MUP18,MUP16,MUP9,MUP12
1	!	1.46e-06	5661	993	341	0.343	0.06	GO:0051179	BP	8	localization	1	TOM1L2,VPREB3,SNAPIN,S100A6,LGALS9,PCNT,SP1,KPNB1,ERGIC1,DDT,IL16,SMO,SLC25A1,CALR,MMD,PHB2,AQP1,LETM1,PRKACA,ATP4A,TOMM40L,PRG4,SUSD2,SLC5A6,CAV1,CLSTN3,BMP7,RARRES2,DMAP1,SLC3A2,PLIN5,FUZ,SLC41A1,CLIC3,SLC25A13,ABCA1,STEAP2,MAPKAPK2,NUP50,EXOSC10,VPS53,SGK2,SRSF1,ATP5G3,SLC22A5,SLC25A22,ATP6V0A1,UBXN6,LRP11,SGK1,ARG1,CRY1,SLC16A7,MICU1,AVPR1A,SLC1A4,SLC36A1,HSPA4,IGFBP3,SREBF1,NBAS,NCOA1,PECAM1…
1	!	0.000496	2687	993	176	0.177	0.066	GO:0033036	BP	8	macromolecule localization	2	TOM1L2,VPREB3,SNAPIN,LGALS9,PCNT,KPNB1,SMO,CALR,MMD,PHB2,PRKACA,TOMM40L,CAV1,CLSTN3,BMP7,DMAP1,PLIN5,FUZ,ABCA1,NUP50,EXOSC10,VPS53,SRSF1,SGK1,CRY1,HSPA4,IGFBP3,SREBF1,NR1D1,STAT5B,ID4,SSR1,TERT,HMGCR,AP3M1,BNIP3L,PPARA,RANGAP1,MYH9,SREBF2,IL1RAP,GPIHBP1,PMM2,KRT18,SLC10A2,PARP3,ACAT2,STARD4,RBP4,TRIM8,BAIAP2,SIRT3,CPEB1,PARD3,MAP4K4,RHBDD1,MFF,NFASC,AHCTF1,COPA,MPC2,EPRS,TOR1A,ABCA2,ABCB11,LRP2,P…
1	!	1.08e-05	380	993	45	0.045	0.118	GO:0010876	BP	8	lipid localization	3	CAV1,PLIN5,ABCA1,CRY1,IGFBP3,STAT5B,PPARA,SREBF2,GPIHBP1,SLC10A2,ACAT2,STARD4,RBP4,EPRS,ABCA2,ABCB11,SLC27A2,ATP9A,SLCO1A4,SLC27A5,AQP8,ATP11A,APOA5,LDLR,SLCO2A1,SIGMAR1,ATP11B,BMP6,ATP8B1,THBS1,ABCB1A,ABCA8A,ACACB,IKBKE,ABCB4,ZC3H12A,PCSK9,PLA2R1,APOL9A,ATP8B4,MUP11,MUP18,MUP16,MUP9,MUP12
1	!	0.00385	152	993	22	0.022	0.145	GO:1905952	BP	8	regulation of lipid localization	4	PLIN5,ABCA1,CRY1,IGFBP3,PPARA,SREBF2,ACAT2,ABCA2,APOA5,BMP6,THBS1,ACACB,IKBKE,ABCB4,ZC3H12A,PCSK9,PLA2R1,MUP11,MUP18,MUP16,MUP9,MUP12
1	!	0.0036	76	993	15	0.015	0.197	GO:0019915	BP	8	lipid storage	4	CAV1,PLIN5,CRY1,STAT5B,PPARA,SREBF2,STARD4,ACACB,IKBKE,ZC3H12A,MUP11,MUP18,MUP16,MUP9,MUP12
1	!	0.0383	51	993	11	0.011	0.216	GO:0010883	BP	8	regulation of lipid storage	5	PLIN5,PPARA,SREBF2,ACACB,IKBKE,ZC3H12A,MUP11,MUP18,MUP16,MUP9,MUP12
1	!	9.29e-06	4388	993	273	0.275	0.062	GO:0051234	BP	8	establishment of localization	2	TOM1L2,VPREB3,SNAPIN,S100A6,LGALS9,PCNT,KPNB1,ERGIC1,IL16,SMO,SLC25A1,CALR,PHB2,AQP1,LETM1,PRKACA,ATP4A,TOMM40L,PRG4,SUSD2,SLC5A6,CAV1,RARRES2,DMAP1,SLC3A2,FUZ,SLC41A1,CLIC3,SLC25A13,ABCA1,STEAP2,MAPKAPK2,NUP50,VPS53,SGK2,SRSF1,ATP5G3,SLC22A5,SLC25A22,ATP6V0A1,UBXN6,LRP11,SGK1,ARG1,CRY1,SLC16A7,MICU1,AVPR1A,SLC1A4,SLC36A1,HSPA4,IGFBP3,SREBF1,NBAS,NCOA1,PECAM1,NR1D1,STAT5B,SLC25A29,SLC17A1,SSR1,SL…
1	!	6.63e-07	4258	993	272	0.274	0.064	GO:0006810	BP	8	transport	3	TOM1L2,VPREB3,SNAPIN,S100A6,LGALS9,PCNT,KPNB1,ERGIC1,IL16,SMO,SLC25A1,CALR,PHB2,AQP1,LETM1,PRKACA,ATP4A,TOMM40L,PRG4,SUSD2,SLC5A6,CAV1,RARRES2,DMAP1,SLC3A2,FUZ,SLC41A1,CLIC3,SLC25A13,ABCA1,STEAP2,MAPKAPK2,NUP50,VPS53,SGK2,SRSF1,ATP5G3,SLC22A5,SLC25A22,ATP6V0A1,UBXN6,LRP11,SGK1,ARG1,CRY1,SLC16A7,MICU1,AVPR1A,SLC1A4,SLC36A1,HSPA4,IGFBP3,SREBF1,NBAS,NCOA1,PECAM1,NR1D1,STAT5B,SLC25A29,SLC17A1,SSR1,SL…
1	!	0.000125	1992	993	141	0.142	0.071	GO:0071705	BP	8	nitrogen compound transport	4	TOM1L2,VPREB3,SNAPIN,LGALS9,PCNT,KPNB1,SMO,CALR,PHB2,AQP1,PRKACA,TOMM40L,SLC5A6,DMAP1,SLC3A2,FUZ,SLC25A13,ABCA1,NUP50,VPS53,SRSF1,SLC22A5,SLC25A22,ARG1,AVPR1A,SLC1A4,SLC36A1,HSPA4,SREBF1,NR1D1,SLC25A29,SLC17A1,SSR1,HMGCR,AP3M1,BNIP3L,RANGAP1,MYH9,IL1RAP,GPIHBP1,PMM2,KRT18,SERINC2,RBP4,SIRT3,CPEB1,PARD3,MAP4K4,RHBDD1,MFF,AHCTF1,COPA,MPC2,TOR1A,LRP2,PEX16,ADAR,ZBTB7B,LMNA,RORC,UBAP1,VCP,SLC25A33,CL…
1	!	0.0253	1687	993	114	0.115	0.068	GO:0042886	BP	8	amide transport	5	TOM1L2,VPREB3,SNAPIN,LGALS9,PCNT,KPNB1,SMO,CALR,PHB2,AQP1,PRKACA,TOMM40L,SLC5A6,DMAP1,FUZ,ABCA1,NUP50,VPS53,HSPA4,SREBF1,NR1D1,SSR1,HMGCR,AP3M1,BNIP3L,RANGAP1,MYH9,IL1RAP,GPIHBP1,PMM2,KRT18,RBP4,SIRT3,PARD3,MAP4K4,RHBDD1,MFF,AHCTF1,COPA,MPC2,TOR1A,LRP2,PEX16,ADAR,ZBTB7B,LMNA,RORC,UBAP1,VCP,CLOCK,RILPL1,EXOC4,ATG7,TNFRSF1A,IDH2,ZFAND6,STX4A,BBS2,WWP2,CMTM6,GORASP1,ANK2,DNM2,VPS18,RAMP1,FRAS1,DENND…
1	!	1.61e-10	2381	993	185	0.186	0.078	GO:0071702	BP	8	organic substance transport	4	TOM1L2,VPREB3,SNAPIN,LGALS9,PCNT,KPNB1,SMO,SLC25A1,CALR,PHB2,AQP1,PRKACA,TOMM40L,SLC5A6,CAV1,RARRES2,DMAP1,SLC3A2,FUZ,SLC25A13,ABCA1,NUP50,VPS53,SRSF1,SLC22A5,SLC25A22,ARG1,CRY1,SLC16A7,AVPR1A,SLC1A4,SLC36A1,HSPA4,IGFBP3,SREBF1,NR1D1,SLC25A29,SLC17A1,SSR1,TERT,HMGCR,AP3M1,BNIP3L,PPARA,RANGAP1,MYH9,SREBF2,IL1RAP,GPIHBP1,PMM2,KRT18,SLC10A2,SERINC2,ACAT2,SLC23A1,STARD4,RBP4,SIRT3,CPEB1,PARD3,MAP4K4,…
1	!	0.00176	296	993	34	0.034	0.115	GO:0015849	BP	8	organic acid transport	5	SLC25A1,SLC5A6,SLC3A2,SLC25A13,SLC25A22,ARG1,SLC16A7,AVPR1A,SLC1A4,SLC36A1,SLC25A29,SLC10A2,SERINC2,SLC23A1,RBP4,AGXT,MPC2,EPRS,ABCB11,LRP2,SLC27A2,SLCO1A4,SLC27A5,AQP8,SLC25A15,SLC7A2,SLCO2A1,SLC38A7,SLC7A5,THBS1,ADORA1,ABCB4,PLA2R1,NTRK2
1	!	0.00886	332	993	35	0.035	0.105	GO:0006869	BP	8	lipid transport	5	CAV1,ABCA1,CRY1,IGFBP3,PPARA,SREBF2,GPIHBP1,SLC10A2,ACAT2,STARD4,RBP4,EPRS,ABCA2,ABCB11,SLC27A2,ATP9A,SLCO1A4,SLC27A5,AQP8,ATP11A,APOA5,LDLR,SLCO2A1,SIGMAR1,ATP11B,BMP6,ATP8B1,THBS1,ABCB1A,ABCA8A,ABCB4,PCSK9,PLA2R1,APOL9A,ATP8B4
1	!	0.0356	26	993	8	0.008	0.308	GO:0034204	BP	8	lipid translocation	6	ABCA1,ATP9A,ATP11A,ATP11B,ATP8B1,ABCB1A,ABCB4,ATP8B4
1	!	0.0189	1567	993	108	0.109	0.069	GO:0006811	BP	8	ion transport	4	S100A6,IL16,SLC25A1,AQP1,LETM1,ATP4A,TOMM40L,SLC5A6,CAV1,SLC3A2,SLC41A1,CLIC3,SLC25A13,ABCA1,STEAP2,ATP5G3,SLC22A5,SLC25A22,ATP6V0A1,SGK1,ARG1,SLC16A7,MICU1,AVPR1A,SLC1A4,SLC36A1,SLC25A29,SLC17A1,CHRNA2,CYC1,SLC10A2,SERINC2,SLC23A1,RBP4,GSTO1,ATP5C1,SLC40A1,AGXT,MPC2,EPRS,TOR1A,ABCB11,LRP2,SLC27A2,SLC20A1,ATP9A,ASIC5,ATP6V0D2,PDE4B,ABCG2,SLC13A4,SLCO1A4,SLC27A5,AQP8,ATP11A,RASA3,SLC25A15,FGFR1,SL…
1	!	8.69e-05	564	993	56	0.056	0.099	GO:0006820	BP	8	anion transport	5	SLC25A1,SLC5A6,SLC3A2,CLIC3,SLC25A13,ABCA1,SLC22A5,SLC25A22,ARG1,SLC16A7,AVPR1A,SLC1A4,SLC36A1,SLC25A29,SLC17A1,SLC10A2,SERINC2,SLC23A1,RBP4,AGXT,MPC2,EPRS,ABCB11,LRP2,SLC27A2,SLC20A1,ATP9A,ABCG2,SLC13A4,SLCO1A4,SLC27A5,AQP8,ATP11A,SLC25A15,FGFR1,SLC7A2,APOA5,LDLR,SLCO2A1,SLC22A15,TTYH2,SLC38A7,CLIC4,ATP11B,ATP8B1,SLC7A5,THBS1,ABCB1A,ADORA1,ABCB4,SLC22A26,PLA2R1,NTRK2,ATP8B4,G6PC,GM6614
1	!	2.56e-06	429	993	50	0.05	0.117	GO:0015711	BP	8	organic anion transport	6	SLC25A1,SLC5A6,SLC3A2,SLC25A13,ABCA1,SLC22A5,SLC25A22,ARG1,SLC16A7,AVPR1A,SLC1A4,SLC36A1,SLC25A29,SLC17A1,SLC10A2,SERINC2,SLC23A1,RBP4,AGXT,MPC2,EPRS,ABCB11,LRP2,SLC27A2,ATP9A,ABCG2,SLCO1A4,SLC27A5,AQP8,ATP11A,SLC25A15,SLC7A2,APOA5,LDLR,SLCO2A1,SLC22A15,SLC38A7,ATP11B,ATP8B1,SLC7A5,THBS1,ABCB1A,ADORA1,ABCB4,SLC22A26,PLA2R1,NTRK2,ATP8B4,G6PC,GM6614
1	!	0.0015	294	993	34	0.034	0.116	GO:0046942	BP	8	carboxylic acid transport	7	SLC25A1,SLC5A6,SLC3A2,SLC25A13,SLC25A22,ARG1,SLC16A7,AVPR1A,SLC1A4,SLC36A1,SLC25A29,SLC10A2,SERINC2,SLC23A1,RBP4,AGXT,MPC2,EPRS,ABCB11,LRP2,SLC27A2,SLCO1A4,SLC27A5,AQP8,SLC25A15,SLC7A2,SLCO2A1,SLC38A7,SLC7A5,THBS1,ADORA1,ABCB4,PLA2R1,NTRK2
1	!	0.000868	198	993	27	0.027	0.136	GO:0006839	BP	8	mitochondrial transport	4	SLC25A1,LETM1,TOMM40L,SLC25A13,SLC25A22,MICU1,HSPA4,SREBF1,SLC25A29,SLC25A48,BNIP3L,CYC1,SLC25A45,MFF,MPC2,SLC25A33,SLC35F6,SLC25A15,SLC25A20,TIMM8A1,SLC25A47,SLC25A44,IMMP2L,TRP53,BNIP3,TOMM5,TMEM102
1	!	0.00148	1465	993	107	0.108	0.073	GO:0055085	BP	8	transmembrane transport	4	S100A6,SLC25A1,AQP1,LETM1,ATP4A,TOMM40L,SLC5A6,CAV1,RARRES2,SLC3A2,SLC41A1,CLIC3,SLC25A13,ABCA1,STEAP2,ATP5G3,SLC22A5,SLC25A22,ATP6V0A1,SLC16A7,MICU1,SLC1A4,SLC36A1,SLC25A29,SLC17A1,SLC25A48,TERT,CHRNA2,CYC1,GPIHBP1,SLC10A2,SLC23A1,SLC25A45,RBP4,GSTO1,ATP5C1,SLC40A1,SLC45A3,MPC2,ABCA2,ABCB11,LRP2,SLC43A3,PEX16,SLC20A1,TMEM144,ASIC5,ATP6V0D2,PDE4B,SESN2,ABCB1B,ABCB8,SLC25A33,SLC35F6,ACTB,ABCG2,SLC…
1	!	0.000959	108	993	19	0.019	0.176	GO:1903825	BP	8	organic acid transmembrane transport	5	SLC25A1,SLC5A6,SLC3A2,SLC25A13,SLC25A22,SLC16A7,SLC1A4,SLC36A1,SLC25A29,SLC23A1,RBP4,MPC2,LRP2,SLC27A5,SLC25A15,SLC7A2,SLC38A7,SLC7A5,THBS1
1	!	0.000959	108	993	19	0.019	0.176	GO:1905039	BP	8	carboxylic acid transmembrane transport	6	SLC25A1,SLC5A6,SLC3A2,SLC25A13,SLC25A22,SLC16A7,SLC1A4,SLC36A1,SLC25A29,SLC23A1,RBP4,MPC2,LRP2,SLC27A5,SLC25A15,SLC7A2,SLC38A7,SLC7A5,THBS1
1	!	0.0308	198	993	24	0.024	0.121	GO:0015893	BP	8	drug transport	4	SLC25A1,AQP1,SLC5A6,SLC25A13,SLC22A5,SLC25A22,ARG1,SLC36A1,SLC25A29,CLDN1,NR1I2,RBP4,TOR1A,ABCB11,LRP2,ABCB1B,ABCG2,SLC25A15,SLC7A2,SLC38A7,CAR14,ATP8B1,ABCB1A,CXCL12
1	!	0.0036	76	993	15	0.015	0.197	GO:0006855	BP	8	drug transmembrane transport	5	SLC25A1,AQP1,SLC25A13,SLC25A22,SLC25A29,RBP4,ABCB11,LRP2,ABCB1B,ABCG2,SLC25A15,SLC7A2,SLC38A7,ATP8B1,ABCB1A
1	!	7.92e-08	1530	993	126	0.127	0.082	GO:0009719	BP	8	response to endogenous stimulus	1	KAT2B,SP1,DAXX,CALR,PHB2,AQP1,PRKACA,POR,NR1I3,CAV1,BMP7,RARRES2,WNT2,FUZ,ABCA1,STEAP2,PDK4,SGK1,ARG1,CRY1,AVPR1A,BTG2,SREBF1,NCOA1,NR1D1,STAT5B,FOS,GPLD1,PPARA,RANGAP1,TAB1,SREBF2,CLDN1,CYC1,NR1I2,APP,RELA,RBP4,CPN1,BAIAP2,RPTOR,CPEB1,IGFBP5,AGXT,EPRS,NR4A2,ABCA2,LRP2,GATM,SORD,CRLS1,BMP2,PDGFC,ZBTB7B,NTRK1,GCLM,RORC,PDE4B,SESN2,CASP9,SLC25A33,CLOCK,ACTB,ASNS,ABCG2,ATG7,NOX4,AQP8,FGFR1,BBS2,CDH5…
1	!	4.65e-06	1244	993	103	0.104	0.083	GO:0071495	BP	8	cellular response to endogenous stimulus	2	KAT2B,SP1,DAXX,CALR,PHB2,AQP1,PRKACA,POR,NR1I3,CAV1,BMP7,RARRES2,WNT2,FUZ,PDK4,SGK1,ARG1,CRY1,AVPR1A,SREBF1,NCOA1,NR1D1,STAT5B,FOS,GPLD1,PPARA,RANGAP1,TAB1,CLDN1,NR1I2,APP,RELA,BAIAP2,RPTOR,CPEB1,IGFBP5,EPRS,NR4A2,LRP2,BMP2,PDGFC,ZBTB7B,NTRK1,GCLM,RORC,PDE4B,SESN2,CASP9,SLC25A33,CLOCK,ACTB,ASNS,ABCG2,ATG7,NOX4,AQP8,FGFR1,BBS2,CDH5,SMARCA4,KANK2,IREB2,CTSH,ADAMTS7,DNM2,FGF1,LEFTY1,UBE2L3,BMP6,IGFB…
1	!	3.24e-08	954	993	91	0.092	0.095	GO:0009725	BP	8	response to hormone	2	KAT2B,SP1,DAXX,CALR,PHB2,AQP1,PRKACA,POR,NR1I3,CAV1,BMP7,RARRES2,STEAP2,PDK4,SGK1,ARG1,CRY1,AVPR1A,BTG2,SREBF1,NCOA1,NR1D1,STAT5B,FOS,GPLD1,PPARA,RANGAP1,SREBF2,CLDN1,CYC1,NR1I2,RELA,RBP4,CPN1,BAIAP2,CPEB1,IGFBP5,AGXT,EPRS,NR4A2,ABCA2,GATM,SORD,CRLS1,ZBTB7B,GCLM,RORC,SESN2,CASP9,SLC25A33,CLOCK,ASNS,ABCG2,BBS2,ETS1,SMARCA4,KANK2,CTSH,BTG1,TXNIP,UQCRFS1,UBE2L3,BMP6,IGFBP2,THBS1,PIK3R1,SERPINA12,GCK…
1	!	0.0113	379	993	38	0.038	0.1	GO:0048545	BP	8	response to steroid hormone	3	DAXX,CALR,PHB2,AQP1,NR1I3,CAV1,BMP7,SGK1,ARG1,CRY1,AVPR1A,SREBF1,NCOA1,NR1D1,FOS,PPARA,CLDN1,NR1I2,RELA,CPN1,AGXT,NR4A2,ABCA2,RORC,CASP9,CLOCK,ABCG2,SMARCA4,KANK2,TXNIP,UBE2L3,BMP6,IGFBP2,PIK3R1,GJB2,ARNTL,NTRK2,RPL32
1	!	3.17e-05	407	993	46	0.046	0.113	GO:0043434	BP	8	response to peptide hormone	3	KAT2B,SP1,POR,CAV1,BMP7,RARRES2,PDK4,SGK1,ARG1,CRY1,BTG2,SREBF1,STAT5B,GPLD1,PPARA,RANGAP1,CYC1,RELA,RBP4,BAIAP2,CPEB1,IGFBP5,EPRS,NR4A2,GATM,ZBTB7B,SESN2,SLC25A33,ABCG2,BTG1,PIK3R1,SERPINA12,GCK,SHC1,PCSK9,GJB2,CFL1,CXCL12,SORT1,JUND,MUP11,GGH,MUP18,MUP16,MUP9,MUP12
1	!	0.00444	254	993	30	0.03	0.118	GO:0032868	BP	8	response to insulin	4	KAT2B,SP1,RARRES2,PDK4,SGK1,CRY1,SREBF1,GPLD1,PPARA,RELA,RBP4,BAIAP2,CPEB1,EPRS,ZBTB7B,SESN2,SLC25A33,ABCG2,PIK3R1,SERPINA12,GCK,SHC1,PCSK9,SORT1,MUP11,GGH,MUP18,MUP16,MUP9,MUP12
1	!	8.31e-12	2759	993	211	0.212	0.076	GO:0070887	BP	8	cellular response to chemical stimulus	1	KAT2B,SP1,DDT,IL16,SMO,DAXX,MCM2,CALR,PHB2,AQP1,NDRG1,PRKACA,POR,NR1I3,CAV1,BMP7,RARRES2,WNT2,FUZ,SLC41A1,DNAJB9,ABCA1,MAPKAPK2,PELP1,PDK4,SGK1,ARG1,CRY1,AVPR1A,MKNK2,NFYB,TNIP1,SREBF1,NCOA1,PXDN,NR1D1,STAT5B,FOS,TRAF3,GPLD1,AAED1,TERT,XRCC4,OCLN,HMGCR,DHFR,BNIP3L,PPARA,RANGAP1,TAB1,CLDN1,IL1RAP,ST3GAL6,NR1I2,HRG,EIF4A2,APP,KRT18,PIM1,CBS,EIF2AK2,RELA,GSTO1,FASN,BAIAP2,RPTOR,CPEB1,ADAM23,SLC40A1,…
1	!	0.00264	610	993	55	0.055	0.09	GO:1901699	BP	8	cellular response to nitrogen compound	2	KAT2B,SP1,DAXX,AQP1,POR,CAV1,RARRES2,PDK4,SGK1,ARG1,SREBF1,STAT5B,GPLD1,TERT,RANGAP1,APP,RELA,BAIAP2,RPTOR,CPEB1,IGFBP5,EPRS,NR4A2,ADAR,PDGFC,ZBTB7B,GCLM,PDE4B,SESN2,SLC25A33,ACTB,ZC3HAV1,ATG7,NOX4,AQP8,RBM3,DNM2,DDX58,PIK3R1,SERPINA12,GCK,SHC1,ZC3H12A,PCSK9,GJB2,NTRK2,CFL1,NPM1,TRP53,RAP1A,MUP11,MUP18,MUP16,MUP9,MUP12
1	!	3.39e-07	1028	993	93	0.094	0.09	GO:1901701	BP	8	cellular response to oxygen-containing compound	2	KAT2B,SP1,SMO,PHB2,AQP1,PRKACA,POR,CAV1,RARRES2,ABCA1,PDK4,SGK1,ARG1,AVPR1A,TNIP1,SREBF1,NR1D1,STAT5B,FOS,GPLD1,HMGCR,DHFR,RANGAP1,CLDN1,APP,PIM1,RELA,BAIAP2,RPTOR,CPEB1,MAP4K4,IGFBP5,XRCC5,MPC2,EPRS,MRC1,NR4A2,PDGFC,ZBTB7B,GCLM,RORC,PDE4B,SESN2,CASP9,SLC25A33,ACTB,ABCG2,ATG7,NOX4,NFKBIB,AQP8,STX4A,ETS1,SMARCA4,LDLR,KANK2,IREB2,TRIB1,DNM2,SIGMAR1,SERPINE1,BMP6,PIK3R1,SERPINA12,GCK,ABCB4,SHC1,ZC3H…
1	!	3.15e-09	2267	993	174	0.175	0.077	GO:0071310	BP	8	cellular response to organic substance	2	KAT2B,SP1,SMO,DAXX,MCM2,CALR,PHB2,AQP1,PRKACA,POR,NR1I3,CAV1,BMP7,RARRES2,WNT2,FUZ,DNAJB9,ABCA1,MAPKAPK2,PDK4,SGK1,ARG1,CRY1,AVPR1A,NFYB,TNIP1,SREBF1,NCOA1,NR1D1,STAT5B,FOS,TRAF3,GPLD1,TERT,OCLN,HMGCR,PPARA,RANGAP1,TAB1,CLDN1,IL1RAP,ST3GAL6,NR1I2,HRG,EIF4A2,APP,KRT18,PIM1,EIF2AK2,RELA,FASN,BAIAP2,RPTOR,CPEB1,ADAM23,MAP4K4,RHBDD1,IGFBP5,XRCC5,MPC2,EPRS,ATF3,MRC1,NR4A2,TOR1A,NMI,LRP2,TRIM44,BMP2,ZB…
1	!	0.000133	571	993	56	0.056	0.098	GO:0071407	BP	8	cellular response to organic cyclic compound	3	SMO,DAXX,CALR,PHB2,AQP1,NR1I3,CAV1,BMP7,ABCA1,SGK1,ARG1,CRY1,NR1D1,GPLD1,TERT,PPARA,NR1I2,APP,PIM1,IGFBP5,NR4A2,BMP2,ADAR,GCLM,RORC,PDE4B,CASP9,CLOCK,ACTB,ABCG2,ZC3HAV1,ATG7,NOX4,AQP8,RBM3,SMARCA4,KANK2,DNM2,CEBPA,UBE2L3,DDX58,ABCB4,ZC3H12A,INSIG1,GJB2,ARNTL,NTRK2,NPM1,GNAI1,RPL32,LGALS1,RAP1A,MUP11,MUP18,HMGCS1,MUP12
1	!	1.57e-05	566	993	58	0.058	0.102	GO:0071396	BP	8	cellular response to lipid	3	SMO,DAXX,CALR,PHB2,AQP1,NR1I3,BMP7,ABCA1,PDK4,SGK1,ARG1,CRY1,TNIP1,SREBF1,NR1D1,GPLD1,PPARA,CLDN1,NR1I2,PIM1,RELA,CPEB1,XRCC5,MRC1,NR4A2,RORC,PDE4B,CASP9,CLOCK,ABCG2,NFKBIB,SMARCA4,LDLR,KANK2,TRIB1,SERPINE1,UBE2L3,BMP6,ABCB4,ZC3H12A,PRKCE,INSIG1,GJB2,PRKCA,CX3CR1,CEBPE,ARNTL,NTRK2,NPM1,GNAI1,RPL32,PTK2B,MUP11,MUP18,MUP16,MUP9,HMGCS1,MUP12
1	!	1.04e-06	640	993	66	0.066	0.103	GO:0032870	BP	8	cellular response to hormone stimulus	3	KAT2B,SP1,DAXX,CALR,PHB2,AQP1,PRKACA,POR,NR1I3,CAV1,BMP7,RARRES2,PDK4,SGK1,ARG1,CRY1,AVPR1A,SREBF1,NCOA1,NR1D1,STAT5B,FOS,GPLD1,PPARA,RANGAP1,NR1I2,RELA,BAIAP2,CPEB1,EPRS,NR4A2,ZBTB7B,GCLM,RORC,CASP9,SLC25A33,CLOCK,ASNS,ABCG2,BBS2,SMARCA4,KANK2,CTSH,UBE2L3,IGFBP2,PIK3R1,SERPINA12,GCK,SHC1,PCSK9,PRKCE,GJB2,JUNB,ARNTL,NTRK2,CFL1,NPM1,LEPR,RPL32,JUND,MUP11,MUP18,MUP16,MUP9,HMGCS1,MUP12
1	!	0.0124	516	993	47	0.047	0.091	GO:0071417	BP	8	cellular response to organonitrogen compound	3	KAT2B,SP1,AQP1,POR,CAV1,RARRES2,PDK4,SGK1,ARG1,SREBF1,STAT5B,GPLD1,RANGAP1,APP,RELA,BAIAP2,RPTOR,CPEB1,IGFBP5,EPRS,NR4A2,PDGFC,ZBTB7B,GCLM,PDE4B,SESN2,SLC25A33,ACTB,ATG7,NOX4,AQP8,DNM2,PIK3R1,SERPINA12,GCK,SHC1,PCSK9,GJB2,NTRK2,CFL1,TRP53,RAP1A,MUP11,MUP18,MUP16,MUP9,MUP12
1	!	0.0285	321	993	33	0.033	0.103	GO:1901653	BP	8	cellular response to peptide	4	KAT2B,SP1,POR,CAV1,RARRES2,PDK4,SGK1,ARG1,SREBF1,STAT5B,GPLD1,RANGAP1,APP,RELA,BAIAP2,CPEB1,EPRS,NR4A2,ZBTB7B,SLC25A33,PIK3R1,SERPINA12,GCK,SHC1,PCSK9,GJB2,CFL1,TRP53,MUP11,MUP18,MUP16,MUP9,MUP12
1	!	0.0101	278	993	31	0.031	0.112	GO:0071375	BP	8	cellular response to peptide hormone stimulus	5	KAT2B,SP1,POR,CAV1,RARRES2,PDK4,SGK1,ARG1,SREBF1,STAT5B,GPLD1,RANGAP1,RELA,BAIAP2,CPEB1,EPRS,NR4A2,ZBTB7B,SLC25A33,PIK3R1,SERPINA12,GCK,SHC1,PCSK9,GJB2,CFL1,MUP11,MUP18,MUP16,MUP9,MUP12
1	!	0.0456	343	993	34	0.034	0.099	GO:0002237	BP	8	response to molecule of bacterial origin	1	LGALS9,SRR,ABCA1,MAPKAPK2,ARG1,TNIP1,NR1D1,STAT5B,FOS,CLDN1,EIF2AK2,RELA,CPEB1,MRC1,PDE4B,CASP9,ABCG2,LTBR,TNFRSF1A,NFKBIB,TRIB1,SERPINE1,BMP6,FMO1,ZC3H12A,PRKCE,GJB2,PRKCA,CX3CR1,CEBPE,JUNB,CNR2,JUND,RPL13A
1	!	0.0165	327	993	34	0.034	0.104	GO:0032496	BP	8	response to lipopolysaccharide	2	LGALS9,SRR,ABCA1,MAPKAPK2,ARG1,TNIP1,NR1D1,STAT5B,FOS,CLDN1,EIF2AK2,RELA,CPEB1,MRC1,PDE4B,CASP9,ABCG2,LTBR,TNFRSF1A,NFKBIB,TRIB1,SERPINE1,BMP6,FMO1,ZC3H12A,PRKCE,GJB2,PRKCA,CX3CR1,CEBPE,JUNB,CNR2,JUND,RPL13A
1	!	0.0256	25	993	8	0.008	0.32	GO:0045332	BP	8	phospholipid translocation	1	ABCA1,ATP9A,ATP11A,ATP11B,ATP8B1,ABCB1A,ABCB4,ATP8B4
1	!	0.0199	3552	993	212	0.213	0.06	GO:0006950	BP	23	response to stress	1	LGALS9,SP1,DDT,SMO,PSMC3,ANGPTL4,DAXX,CALR,PHB2,AQP1,NDRG1,PRKACA,CAV1,GPRC5B,RARRES2,DMAP1,RDM1,RPA3,DNAJB9,ABCA1,MAPKAPK2,DHX58,PDK4,UBXN6,LRP11,SGK1,ARG1,CRY1,AVPR1A,1810043G02RIK,TNIP1,BTG2,SREBF1,PXDN,PSMC5,PECAM1,NR1D1,STAT5B,FOS,TRAF3,WRNIP1,TERT,XRCC4,HMGCR,DHFR,ACOX2,PLAU,RNASEH2B,BNIP3L,PPARA,RANGAP1,SREBF2,CLDN1,IL1RAP,HRG,APP,RCAN1,PARP3,TFF3,CBS,EIF2AK2,LIPA,RELA,TRIM8,CPEB1,PARD3,PD…
1	!	0.0106	2060	993	136	0.137	0.066	GO:0008219	BP	1	cell death	1	SMO,ANGPTL4,DAXX,MCM2,PHB2,AQP1,POR,PPP2R1A,CAV1,BMP7,MLKL,BIK,SGK2,E2F2,PDK4,SGK1,MKNK2,CABIN1,BTG2,IGFBP3,NCOA1,TMIGD1,STAT5B,FOS,TRAF3,GPLD1,TERT,HMGCR,ACOX2,PLAU,TSC22D1,BNIP3L,PPARA,HRG,APP,KRT18,PIM1,CBS,EIF2AK2,RELA,JADE1,SLC40A1,MAP4K4,RHBDD1,MFF,ATF3,NEK6,FAM129B,NR4A2,BMP2,ZC3H8,ADAR,LMNA,NTRK1,GCLM,CTH,EPHA7,VCP,CASP9,SLC35F6,ALB,RILPL1,GNGT1,ASNS,NAT8,ETV6,CIDEC,ATG7,LTBR,TNFRSF1A,NOX…
1	!	0.0012	1707	993	121	0.122	0.071	GO:0010941	BP	1	regulation of cell death	2	SMO,ANGPTL4,DAXX,PHB2,AQP1,POR,PPP2R1A,CAV1,BMP7,BIK,SGK2,PDK4,SGK1,CABIN1,BTG2,IGFBP3,NCOA1,TMIGD1,STAT5B,FOS,TRAF3,GPLD1,TERT,HMGCR,ACOX2,TSC22D1,BNIP3L,PPARA,HRG,KRT18,PIM1,CBS,EIF2AK2,RELA,SLC40A1,MAP4K4,RHBDD1,MFF,ATF3,NEK6,FAM129B,NR4A2,BMP2,ZC3H8,ADAR,LMNA,NTRK1,GCLM,CTH,EPHA7,VCP,CASP9,SLC35F6,ALB,RILPL1,ASNS,NAT8,CIDEC,ATG7,LTBR,TNFRSF1A,NOX4,ZFAND6,LCMT1,STX4A,PDILT,FGFR1,DUS2,AARS,BIRC…
1	!	0.0206	1570	993	108	0.109	0.069	GO:0043067	BP	1	regulation of programmed cell death	3	SMO,ANGPTL4,PHB2,AQP1,POR,PPP2R1A,CAV1,BMP7,BIK,SGK2,PDK4,SGK1,BTG2,IGFBP3,NCOA1,TMIGD1,STAT5B,TRAF3,GPLD1,TERT,HMGCR,TSC22D1,BNIP3L,HRG,KRT18,PIM1,CBS,EIF2AK2,RELA,SLC40A1,MAP4K4,RHBDD1,MFF,ATF3,NEK6,FAM129B,NR4A2,BMP2,ZC3H8,ADAR,LMNA,NTRK1,GCLM,CTH,EPHA7,VCP,CASP9,SLC35F6,ALB,ASNS,NAT8,CIDEC,ATG7,LTBR,TNFRSF1A,NOX4,ZFAND6,LCMT1,STX4A,PDILT,FGFR1,AARS,BIRC3,ETS1,SMARCA4,KANK2,CTSH,ANK2,RPS29,SIG…
1	!	0.0212	1553	993	107	0.108	0.069	GO:0042981	BP	1	regulation of apoptotic process	1	SMO,ANGPTL4,PHB2,AQP1,POR,PPP2R1A,CAV1,BMP7,BIK,SGK2,PDK4,SGK1,BTG2,IGFBP3,NCOA1,TMIGD1,STAT5B,TRAF3,GPLD1,TERT,HMGCR,TSC22D1,BNIP3L,HRG,KRT18,PIM1,CBS,EIF2AK2,RELA,SLC40A1,MAP4K4,RHBDD1,MFF,ATF3,NEK6,FAM129B,NR4A2,BMP2,ZC3H8,ADAR,LMNA,NTRK1,GCLM,CTH,EPHA7,VCP,CASP9,SLC35F6,ALB,ASNS,NAT8,CIDEC,ATG7,LTBR,TNFRSF1A,NOX4,ZFAND6,LCMT1,STX4A,PDILT,FGFR1,AARS,BIRC3,ETS1,SMARCA4,CTSH,ANK2,RPS29,SIGMAR1,G…
1	!	0.047	543	993	47	0.047	0.087	GO:0031347	BP	20	regulation of defense response	1	LGALS9,DDT,CAV1,GPRC5B,MAPKAPK2,DHX58,ARG1,TNIP1,NR1D1,STAT5B,TRAF3,PPARA,APP,RELA,XRCC5,CD55,NMI,TRIM44,ZBP1,ADAR,CLOCK,ZC3HAV1,CLEC2D,TNFRSF1A,SLC7A2,CDH5,ETS1,LDLR,TAP1,SERPINE1,TGM2,METRNL,DDX58,MVK,ADORA1,ZC3H12A,CTLA2A,PRKCE,IRGM1,HEXIM1,VAMP8,CX3CR1,RAET1E,S100A8,TRIM12C,CALCRL,CNR2
1	!	0.0248	1113	993	82	0.083	0.074	GO:0009628	BP	22	response to abiotic stimulus	1	ANGPTL4,DAXX,PHB2,AQP1,NDRG1,PRKACA,CAV1,LRP11,SGK1,CRY1,AVPR1A,BTG2,FOS,GPLD1,TERT,XRCC4,HMGCR,PLAU,BNIP3L,PPARA,CLDN1,ARSA,APP,CBS,RELA,RBP4,CPEB1,RHBDD1,XRCC5,NR4A2,LRP2,SORD,BMP2,LMNA,NTRK1,CASP9,MTHFR,CLOCK,TFEC,ACTB,GNGT1,ASNS,ATG7,LTBR,TNFRSF1A,NOX4,RBM3,RASA3,ETS1,IREB2,DNM2,INO80,GNAT1,ACOT11,REEP6,GADD45A,FGF1,TXNIP,BMP6,METRNL,IGFBP2,CITED2,THBS1,FMO1,ABCB1A,PIK3R1,ADORA1,PRKCE,KRT8,JU…
1	!	0.0462	1618	993	109	0.11	0.067	GO:0015031	BP	16	protein transport	1	TOM1L2,VPREB3,SNAPIN,LGALS9,PCNT,KPNB1,SMO,CALR,PHB2,PRKACA,TOMM40L,DMAP1,FUZ,ABCA1,NUP50,VPS53,HSPA4,SREBF1,NR1D1,SSR1,HMGCR,AP3M1,BNIP3L,RANGAP1,MYH9,IL1RAP,GPIHBP1,PMM2,KRT18,RBP4,SIRT3,PARD3,MAP4K4,RHBDD1,MFF,AHCTF1,COPA,MPC2,TOR1A,LRP2,PEX16,ADAR,ZBTB7B,LMNA,RORC,UBAP1,VCP,CLOCK,RILPL1,EXOC4,ATG7,TNFRSF1A,IDH2,ZFAND6,STX4A,BBS2,WWP2,CMTM6,GORASP1,ANK2,DNM2,VPS18,RAMP1,FRAS1,DENND1A,COX18,TAP…
1	!	1.64e-05	2341	993	164	0.165	0.07	GO:0009605	BP	5	response to external stimulus	1	LGALS9,SRR,DDT,IL16,SMO,ANGPTL4,CALR,AQP1,POR,CAV1,GPRC5B,BMP7,RARRES2,ABCA1,MAPKAPK2,DHX58,PDK4,LRP11,ARG1,CRY1,AVPR1A,TNIP1,BTG2,SREBF1,NCOA1,NR1D1,STAT5B,FOS,TRAF3,HMGCR,PLAU,BNIP3L,PPARA,SREBF2,CLDN1,PLEC,TYMP,ARSA,HRG,APP,PIM1,CBS,EIF2AK2,RELA,RBP4,DNTT,PTPRJ,BAIAP2,RPTOR,CPEB1,PDGFA,CD55,NFASC,ATF3,MRC1,NR4A2,KYNU,TRIM44,GATM,SORD,ZBP1,CAR3,AHCY,ADAR,EFNA3,SEMA4A,NTRK1,GCLM,EPHA7,PDE4B,SESN…
1	!	0.00958	319	993	34	0.034	0.107	GO:0071496	BP	5	cellular response to external stimulus	2	ANGPTL4,AQP1,CAV1,PDK4,AVPR1A,SREBF1,NCOA1,FOS,SREBF2,PIM1,EIF2AK2,BAIAP2,RPTOR,ATF3,NR4A2,SESN2,ALB,ASNS,ATG7,LTBR,TNFRSF1A,MAP1LC3B,KANK2,IREB2,GADD45A,BMP6,GCK,DCTPP1,ZC3H12A,PCSK9,TRP53,BNIP3,FCOR,MUP12
1	!	0.0457	688	993	56	0.056	0.081	GO:0032101	BP	5	regulation of response to external stimulus	2	LGALS9,DDT,IL16,CALR,CAV1,GPRC5B,RARRES2,DHX58,ARG1,TNIP1,STAT5B,TRAF3,HMGCR,PLAU,PPARA,HRG,APP,RELA,PDGFA,CD55,TRIM44,CLOCK,ZC3HAV1,TNFRSF1A,STX4A,FGFR1,SLC7A2,BBS2,CDH5,ETS1,LDLR,KANK2,TRIB1,RYK,FGF1,SERPINE1,TGM2,BMP6,CAMK1D,METRNL,THBS1,DDX58,MVK,ADORA1,ZC3H12A,CTLA2A,USP14,VAMP8,PRKCA,CX3CR1,S100A8,PTK2B,CALCRL,CXCL12,CNR2,TMEM102
1	!	4.99e-05	526	993	54	0.054	0.103	GO:0009991	BP	5	response to extracellular stimulus	2	ANGPTL4,POR,BMP7,ABCA1,PDK4,LRP11,ARG1,AVPR1A,SREBF1,NCOA1,FOS,HMGCR,PPARA,SREBF2,PLEC,ARSA,PIM1,CBS,EIF2AK2,RELA,DNTT,BAIAP2,RPTOR,ATF3,NR4A2,KYNU,GATM,SORD,AHCY,NTRK1,GCLM,SESN2,MTHFR,ALB,ASNS,ABCG2,ATG7,BBS2,MAP1LC3B,LDLR,KANK2,IREB2,BMP6,IGFBP2,GCK,ACACB,DCTPP1,ZC3H12A,PCSK9,TRP53,G6PC,FCOR,HMGCS1,MUP12
1	!	0.000739	496	993	49	0.049	0.099	GO:0031667	BP	5	response to nutrient levels	3	ANGPTL4,POR,BMP7,ABCA1,PDK4,LRP11,ARG1,SREBF1,NCOA1,HMGCR,PPARA,SREBF2,PLEC,ARSA,PIM1,CBS,EIF2AK2,RELA,DNTT,BAIAP2,RPTOR,ATF3,KYNU,GATM,SORD,AHCY,NTRK1,GCLM,SESN2,MTHFR,ALB,ASNS,ABCG2,ATG7,BBS2,MAP1LC3B,LDLR,KANK2,IREB2,IGFBP2,GCK,ACACB,ZC3H12A,PCSK9,TRP53,G6PC,FCOR,HMGCS1,MUP12
1	!	0.0293	251	993	28	0.028	0.112	GO:0031668	BP	5	cellular response to extracellular stimulus	1	ANGPTL4,PDK4,AVPR1A,SREBF1,NCOA1,FOS,SREBF2,PIM1,EIF2AK2,BAIAP2,RPTOR,ATF3,NR4A2,SESN2,ALB,ASNS,ATG7,MAP1LC3B,KANK2,IREB2,BMP6,GCK,DCTPP1,ZC3H12A,PCSK9,TRP53,FCOR,MUP12
1	!	0.00527	5928	993	333	0.335	0.056	GO:0032502	BP	15	developmental process	1	KAT2B,SNAPIN,LGALS9,SP1,SRR,SMO,PSMC3,ANGPTL4,MCM2,CALR,MMD,PHB2,AQP1,NDRG1,PRKACA,POR,TBCB,FBLIM1,PPP2R1A,CAV1,CLSTN3,GPRC5B,BMP7,RARRES2,WNT2,FUZ,MED15,ATRAID,DNAJB9,HSD11B1,MAPKAPK2,NUP50,BIK,MAFK,SRSF1,SLC22A5,E2F2,RSPO3,SGK1,ARG1,AVPR1A,MKNK2,1810043G02RIK,BTG2,IGFBP3,SREBF1,NCOA1,PECAM1,NR1D1,STAT5B,FOS,GPLD1,ID4,TERT,HMGCR,DHFR,PLAU,RNASEH2B,PPARA,L3MBTL2,TAB1,MYH9,CLDN1,IL1RAP,TYMP,ARSA,H…
1	!	0.0034	5469	993	312	0.314	0.057	GO:0048856	BP	15	anatomical structure development	2	KAT2B,SNAPIN,LGALS9,SP1,SRR,SMO,PSMC3,ANGPTL4,MCM2,CALR,MMD,PHB2,AQP1,NDRG1,PRKACA,POR,TBCB,FBLIM1,PPP2R1A,CAV1,CLSTN3,GPRC5B,BMP7,RARRES2,WNT2,FUZ,ATRAID,DNAJB9,HSD11B1,MAPKAPK2,NUP50,BIK,MAFK,SRSF1,SLC22A5,E2F2,RSPO3,SGK1,ARG1,AVPR1A,MKNK2,1810043G02RIK,BTG2,IGFBP3,SREBF1,NCOA1,PECAM1,STAT5B,FOS,GPLD1,ID4,TERT,HMGCR,DHFR,PLAU,RNASEH2B,PPARA,L3MBTL2,TAB1,MYH9,CLDN1,IL1RAP,TYMP,ARSA,HRG,APP,RCAN1…
1	!	0.011	321	993	34	0.034	0.106	GO:0007568	BP	15	aging	2	SRR,CALR,CAV1,ARG1,SREBF1,FOS,TERT,HMGCR,CLDN1,APP,RELA,IGFBP5,LMNA,NTRK1,GCLM,CASP9,ABCG2,ATG7,NOX4,PPP1R9A,SERPINE1,CDKN1C,IGFBP2,CITED2,SHC1,GJB2,PLA2R1,ARNTL,IDE,NPM1,TRP53,ING2,JUND,NUP62
1	!	0.0146	5023	993	286	0.288	0.057	GO:0007275	BP	15	multicellular organism development	1	KAT2B,SNAPIN,LGALS9,SP1,SRR,SMO,PSMC3,ANGPTL4,MCM2,CALR,MMD,PHB2,AQP1,NDRG1,PRKACA,POR,TBCB,CAV1,CLSTN3,GPRC5B,BMP7,RARRES2,WNT2,FUZ,ATRAID,DNAJB9,HSD11B1,MAPKAPK2,NUP50,BIK,MAFK,SRSF1,SLC22A5,E2F2,RSPO3,SGK1,ARG1,AVPR1A,MKNK2,BTG2,SREBF1,NCOA1,PECAM1,STAT5B,FOS,GPLD1,ID4,TERT,HMGCR,DHFR,PLAU,RNASEH2B,PPARA,TAB1,MYH9,CLDN1,IL1RAP,TYMP,ARSA,HRG,APP,RCAN1,FOXP4,PIM1,CBS,EIF2AK2,SPATA24,SLC23A1,LTB,…
1	!	0.00275	4523	993	266	0.268	0.059	GO:0048731	BP	15	system development	2	KAT2B,SNAPIN,LGALS9,SP1,SRR,SMO,ANGPTL4,MCM2,CALR,MMD,PHB2,AQP1,NDRG1,PRKACA,POR,TBCB,CAV1,CLSTN3,GPRC5B,BMP7,RARRES2,WNT2,FUZ,ATRAID,DNAJB9,HSD11B1,MAPKAPK2,NUP50,BIK,MAFK,SRSF1,SLC22A5,E2F2,RSPO3,SGK1,ARG1,AVPR1A,MKNK2,BTG2,SREBF1,NCOA1,PECAM1,STAT5B,FOS,GPLD1,ID4,TERT,HMGCR,DHFR,PLAU,PPARA,TAB1,MYH9,CLDN1,IL1RAP,TYMP,ARSA,HRG,APP,RCAN1,FOXP4,PIM1,CBS,EIF2AK2,SLC23A1,LTB,PCDH12,RPS14,LIPA,OVOL1…
1	!	0.00179	157	993	23	0.023	0.146	GO:0061008	BP	15	hepaticobiliary system development	3	SP1,SRSF1,ARG1,STAT5B,PLAU,CLDN1,RELA,RPS24,SP3,ASNS,ATG7,SMARCA4,CEBPA,RPS16,PTPN3,CITED2,PCSK9,NPM1,RPL32,DBP,RAP1A,MPST,HMGCS1
1	!	0.00127	154	993	23	0.023	0.149	GO:0001889	BP	15	liver development	4	SP1,SRSF1,ARG1,STAT5B,PLAU,CLDN1,RELA,RPS24,SP3,ASNS,ATG7,SMARCA4,CEBPA,RPS16,PTPN3,CITED2,PCSK9,NPM1,RPL32,DBP,RAP1A,MPST,HMGCS1
1	!	0.00498	1665	993	116	0.117	0.07	GO:0042127	BP	18	regulation of cell proliferation	1	KAT2B,LGALS9,SP1,SMO,NACC1,CALR,PHB2,AQP1,NDRG1,PRKACA,POR,RPS9,MVD,CAV1,BMP7,WNT2,FUZ,RPA3,ATRAID,SGK2,ARG1,AVPR1A,BTG2,IGFBP3,NAMPT,TMIGD1,NR1D1,STAT5B,GPLD1,ID4,TERT,HMGCR,PLAU,RNASEH2B,TSC22D1,HRG,APP,PIM1,EIF2AK2,OVOL1,RELA,RBP4,PTPRJ,RPTOR,CPEB1,PDGFA,IGFBP5,XRCC5,ATF3,FAM129B,LRP2,BMP2,S100A11,PDGFC,ZBTB7B,LMNA,NTRK1,CTH,CDKN2C,SLC25A33,SLC35F6,CNBP,LTBR,TNFRSF1A,IDH2,NOX4,ACER3,STX4A,FGFR…
1	!	0.0164	460	993	43	0.043	0.093	GO:0007005	BP	2	mitochondrion organization	1	PHB2,LETM1,TOMM40L,BIK,SLC22A5,HSPA4,SREBF1,TERT,BNIP3L,NDUFB9,TYMP,SYNJ2,ATG2A,NDUFB8,MFF,LMNA,GCLM,SESN2,SLC25A33,SLC35F6,ATG7,MYH14,MAP1LC3B,DNM2,CEBPA,COX18,INF2,APOPT1,NDUFB10,TIMM8A1,2410015M20RIK,OPA3,IMMP2L,TRP53,NDUFB6,MUP11,BNIP3,MUP18,MUP16,MUP9,TOMM5,TMEM102,MUP12
1	!	0.0283	197	993	24	0.024	0.122	GO:1901605	BP	6	alpha-amino acid metabolic process	1	SRR,GCAT,ARG1,STAT5B,CBS,AGXT,SCLY,KYNU,GATM,AHCY,GCLM,CTH,MTHFR,MTHFD2L,ASNS,AHCYL2,NOX4,OAT,NMNAT3,CYP2D22,GLYAT,GM5096,MPST,BHMT
1	!	0.00222	39	993	11	0.011	0.282	GO:0009069	BP	6	serine family amino acid metabolic process	2	SRR,GCAT,CBS,AGXT,SCLY,AHCY,GCLM,CTH,AHCYL2,GLYAT,MPST
1	!	3.52e-17	11180	993	647	0.652	0.058	GO:0008152	BP	6	metabolic process	1	NARF,SCPEP1,KAT2B,SNAPIN,LGALS9,SP1,SRR,CYP51,STK38L,DDT,IL16,SMO,CAPNS1,NACC1,PSMC3,ANGPTL4,DAXX,HLTF,IKZF4,MCM2,LIPE,FKBP11,RPS11,INMT,CYP17A1,CALR,MMD,PHB2,AQP1,PRKACA,POR,NR1I3,CS,RPS9,GCAT,ELOVL1,MVD,PPP2R1A,CAV1,MID1IP1,CARHSP1,RPS18,GPRC5B,BMP7,RARRES2,DMAP1,KDSR,SLC3A2,RDM1,WNT2,PLIN5,FUZ,MED15,RPA3,RPS5,GFOD2,ATRAID,ST3GAL1,DNAJB9,SLC25A13,ABCA1,CLPX,STEAP2,HSD11B1,LONRF3,MAPKAPK2,CMAH,T…
1	!	1.87e-35	1750	993	206	0.207	0.118	GO:0044281	BP	6	small molecule metabolic process	2	SCPEP1,KAT2B,SRR,CYP51,LIPE,CYP17A1,AQP1,POR,CS,GCAT,ELOVL1,MVD,CAV1,MID1IP1,KDSR,PLIN5,ST3GAL1,SLC25A13,ABCA1,CLPX,HSD11B1,CMAH,ATP5G3,ATP6V0A1,PDK4,ARG1,VNN3,CRY1,AVPR1A,IGFBP3,SREBF1,NAMPT,GALK1,NR1D1,ACLY,STAT5B,FDFT1,SLC17A1,ECI2,ACOT12,HMGCR,DHFR,ACOX2,HACL1,RNASEH2B,NADK2,SQLE,NDUFB9,PPARA,SREBF2,CYC1,TYMP,PMM2,EHHADH,APP,SYNJ2,ACAT2,CYP39A1,PIM1,TFF3,CBS,STARD4,IMPA2,FADS3,ALDH1A7,LIPA,RB…
1	!	1.77e-06	321	993	42	0.042	0.131	GO:0062012	BP	6	regulation of small molecule metabolic process	3	KAT2B,POR,CAV1,MID1IP1,PLIN5,HSD11B1,PDK4,AVPR1A,IGFBP3,SREBF1,NR1D1,PPARA,TFF3,STARD4,IGFBP5,SLC45A3,BMP2,RORC,VCP,SESN2,SLC25A33,LCMT1,APOA5,LDLR,FGF1,BMP6,SERPINA12,GCK,ACACB,PRKCE,INSIG1,LEPR,DHCR7,PTK2B,TRP53,FDPS,MUP11,MLYCD,MUP18,MUP16,MUP9,MUP12
1	!	4.88e-12	10186	993	582	0.586	0.057	GO:0044238	BP	6	primary metabolic process	2	SCPEP1,KAT2B,SNAPIN,LGALS9,SP1,SRR,CYP51,STK38L,DDT,IL16,SMO,CAPNS1,NACC1,PSMC3,ANGPTL4,DAXX,HLTF,IKZF4,MCM2,LIPE,FKBP11,RPS11,CYP17A1,CALR,MMD,PHB2,AQP1,PRKACA,POR,NR1I3,CS,RPS9,GCAT,ELOVL1,MVD,PPP2R1A,CAV1,MID1IP1,CARHSP1,RPS18,GPRC5B,BMP7,RARRES2,DMAP1,KDSR,SLC3A2,RDM1,WNT2,PLIN5,FUZ,MED15,RPA3,RPS5,ATRAID,ST3GAL1,DNAJB9,SLC25A13,ABCA1,CLPX,HSD11B1,LONRF3,MAPKAPK2,CMAH,TTLL12,EXOSC10,SGK2,MAFK…
1	!	6.57e-05	2043	993	145	0.146	0.071	GO:0009056	BP	6	catabolic process	2	SCPEP1,SNAPIN,PSMC3,LIPE,PRKACA,POR,GCAT,CARHSP1,RARRES2,PLIN5,ATRAID,DNAJB9,CLPX,HSD11B1,LONRF3,MAPKAPK2,EXOSC10,ATP6V0A1,UBXN6,ARG1,BTG2,IGFBP3,SREBF1,NBAS,RNF144A,PXDN,PSMC5,GALK1,NR1D1,GPLD1,ECI2,ACOX2,HACL1,RNASEH2B,BNIP3L,PPARA,ARSA,NR1I2,EHHADH,SYNJ2,ACAT2,CYP39A1,CBS,IMPA2,ALDH1A7,ATG2A,LIPA,RELA,CAPN1,TRIM8,GSTO1,CPN1,ABHD6,PAOX,ACADL,RHBDD1,AGXT,SCLY,PTER,TOR1A,KYNU,PSMD14,UBE2L6,SORD,S…
1	!	4.49e-05	305	993	38	0.038	0.125	GO:0044282	BP	6	small molecule catabolic process	3	LIPE,GCAT,PLIN5,ARG1,GALK1,ECI2,ACOX2,HACL1,EHHADH,SYNJ2,ACAT2,CYP39A1,CBS,IMPA2,ALDH1A7,ACADL,AGXT,SCLY,KYNU,SORD,SLC27A2,LPIN3,AHCY,GALE,CYP4A31,SESN2,SULT1B1,QPRT,ETFA,ALDH1B1,GALT,AKR1D1,ACACB,ACOT4,CES1D,TRP53,CYP4A32,MLYCD
1	!	6.21e-12	5762	993	371	0.374	0.064	GO:0009058	BP	6	biosynthetic process	2	KAT2B,SP1,SRR,CYP51,DDT,IL16,SMO,NACC1,PSMC3,DAXX,HLTF,IKZF4,MCM2,LIPE,RPS11,CYP17A1,CALR,PHB2,AQP1,POR,NR1I3,RPS9,GCAT,ELOVL1,MVD,CAV1,MID1IP1,CARHSP1,RPS18,BMP7,DMAP1,KDSR,WNT2,PLIN5,MED15,RPA3,RPS5,ST3GAL1,SLC25A13,ABCA1,HSD11B1,MAPKAPK2,EXOSC10,MAFK,ATP5G3,PELP1,E2F2,ATP6V0A1,PDK4,ARG1,CRY1,AVPR1A,MKNK2,NFYB,TNIP1,BTG2,SREBF1,NAMPT,NCOA1,PSMC5,MIF4GD,GALK1,TEN1,NR1D1,ACLY,STAT5B,FOS,FDFT1,TRA…
1	!	2.01e-16	638	993	86	0.087	0.135	GO:0044283	BP	6	small molecule biosynthetic process	3	KAT2B,SRR,CYP51,POR,ELOVL1,MVD,MID1IP1,PDK4,CRY1,AVPR1A,SREBF1,GALK1,NR1D1,ACLY,FDFT1,HMGCR,DHFR,PPARA,CYP39A1,CBS,STARD4,IMPA2,FADS3,RBP4,GSTO1,FASN,AGXT,SLC45A3,ATF3,HSD17B7,KYNU,HSD17B12,GATM,SORD,ITPKA,BMP2,SLC27A2,AHCY,PMVK,CTH,VCP,GALE,SESN2,PGD,MTHFR,UGDH,MTHFD2L,PRKAB1,MMAB,ASNS,SLC27A5,ACER3,OAT,NSDHL,NUDT7,SC5D,APOA5,LSS,FGF1,DECR2,AKR1D1,BMP6,SERPINA12,GCK,MVK,ACACB,DCTPP1,FADS6,INSIG1…
1	!	4.67e-15	1063	993	115	0.116	0.108	GO:0055114	BP	6	oxidation-reduction process	2	NARF,CYP51,CYP17A1,PRKACA,POR,CS,KDSR,PLIN5,GFOD2,SLC25A13,STEAP2,HSD11B1,CMAH,PDK4,CYB561,RTN4IP1,PXDN,DHRS13,NR1D1,DHRS7,ECI2,AAED1,HMGCR,DHFR,ACOX2,HACL1,SQLE,NDUFB9,PPARA,CYC1,EHHADH,ACAT2,CYP39A1,CBS,PCDH12,FADS3,ALDH1A7,GSTO1,FASN,NDUFB8,PAOX,SIRT3,ACADL,HSD17B7,HSD17B12,SORD,BMP2,SLC27A2,CYP2U1,VCP,GPX7,CYP4A31,CYP4B1,SESN2,PGD,MTHFR,UGDH,HSD17B11,MTHFD2L,CYP2B10,IDH2,NOX4,NSDHL,MSMO1,HSD1…
1	!	8.19e-13	10623	993	605	0.609	0.057	GO:0071704	BP	6	organic substance metabolic process	2	SCPEP1,KAT2B,SNAPIN,LGALS9,SP1,SRR,CYP51,STK38L,DDT,IL16,SMO,CAPNS1,NACC1,PSMC3,ANGPTL4,DAXX,HLTF,IKZF4,MCM2,LIPE,FKBP11,RPS11,INMT,CYP17A1,CALR,MMD,PHB2,AQP1,PRKACA,POR,NR1I3,CS,RPS9,GCAT,ELOVL1,MVD,PPP2R1A,CAV1,MID1IP1,CARHSP1,RPS18,GPRC5B,BMP7,RARRES2,DMAP1,KDSR,SLC3A2,RDM1,WNT2,PLIN5,FUZ,MED15,RPA3,RPS5,ATRAID,ST3GAL1,DNAJB9,SLC25A13,ABCA1,CLPX,HSD11B1,LONRF3,MAPKAPK2,CMAH,TTLL12,EXOSC10,SGK2…
1	!	2.47e-13	438	993	64	0.064	0.146	GO:1901615	BP	6	organic hydroxy compound metabolic process	3	CYP51,DDT,LIPE,POR,MVD,ABCA1,SREBF1,GALK1,NR1D1,FDFT1,HMGCR,DHFR,SQLE,SREBF2,APP,SYNJ2,CYP39A1,STARD4,IMPA2,ALDH1A7,LIPA,RBP4,HSD17B7,NR4A2,SORD,ITPKA,BMP2,SLC27A2,PMVK,CYP4A31,SULT1B1,SULT1D1,SLC27A5,ACER3,NSDHL,FGFR1,MSMO1,SC5D,APOA5,LDLR,LSS,GDE1,CEBPA,ALDH1B1,FGF1,AKR1D1,BMP6,ATP8B1,SERPINA12,MVK,ADRBK2,PCSK9,INSIG1,RETSAT,CES1D,LEPR,DHCR7,PTK2B,TRP53,FDPS,CYP2D22,CYP4A32,RDH11,HMGCS1
1	!	2.25e-13	282	993	50	0.05	0.177	GO:0006066	BP	6	alcohol metabolic process	4	CYP51,LIPE,POR,MVD,ABCA1,SREBF1,GALK1,FDFT1,HMGCR,DHFR,SQLE,SREBF2,APP,SYNJ2,CYP39A1,IMPA2,ALDH1A7,RBP4,HSD17B7,SORD,ITPKA,BMP2,PMVK,SULT1B1,ACER3,NSDHL,FGFR1,SC5D,APOA5,LDLR,LSS,GDE1,CEBPA,ALDH1B1,FGF1,AKR1D1,BMP6,SERPINA12,MVK,ADRBK2,PCSK9,INSIG1,RETSAT,CES1D,LEPR,DHCR7,PTK2B,FDPS,RDH11,HMGCS1
1	!	6.92e-14	113	993	32	0.032	0.283	GO:1902652	BP	6	secondary alcohol metabolic process	5	CYP51,LIPE,POR,MVD,ABCA1,SREBF1,FDFT1,HMGCR,SQLE,SREBF2,APP,CYP39A1,HSD17B7,PMVK,NSDHL,FGFR1,SC5D,APOA5,LDLR,LSS,CEBPA,FGF1,AKR1D1,SERPINA12,MVK,PCSK9,INSIG1,CES1D,LEPR,DHCR7,FDPS,HMGCS1
1	!	0.000675	1724	993	123	0.124	0.071	GO:1901575	BP	6	organic substance catabolic process	3	SCPEP1,PSMC3,LIPE,PRKACA,GCAT,CARHSP1,RARRES2,PLIN5,ATRAID,DNAJB9,CLPX,HSD11B1,LONRF3,MAPKAPK2,EXOSC10,UBXN6,ARG1,BTG2,IGFBP3,NBAS,RNF144A,PSMC5,GALK1,NR1D1,GPLD1,ECI2,ACOX2,HACL1,RNASEH2B,BNIP3L,PPARA,EHHADH,SYNJ2,ACAT2,CYP39A1,CBS,IMPA2,ALDH1A7,LIPA,RELA,CAPN1,CPN1,ABHD6,PAOX,ACADL,RHBDD1,AGXT,SCLY,TOR1A,KYNU,PSMD14,UBE2L6,SORD,SLC27A2,LPIN3,AHCY,RAD23B,UBAP1,VCP,USP24,GALE,CYP4A31,SESN2,PSMC2,…
1	!	2.6e-11	5675	993	364	0.367	0.064	GO:1901576	BP	6	organic substance biosynthetic process	3	KAT2B,SP1,SRR,CYP51,DDT,IL16,SMO,NACC1,PSMC3,DAXX,HLTF,IKZF4,MCM2,LIPE,RPS11,CYP17A1,CALR,PHB2,AQP1,POR,NR1I3,RPS9,ELOVL1,MVD,CAV1,MID1IP1,CARHSP1,RPS18,BMP7,DMAP1,KDSR,WNT2,PLIN5,MED15,RPA3,RPS5,ST3GAL1,SLC25A13,ABCA1,HSD11B1,MAPKAPK2,EXOSC10,MAFK,ATP5G3,PELP1,E2F2,ATP6V0A1,PDK4,ARG1,CRY1,AVPR1A,MKNK2,NFYB,TNIP1,BTG2,SREBF1,NAMPT,NCOA1,PSMC5,MIF4GD,GALK1,TEN1,NR1D1,ACLY,STAT5B,FOS,FDFT1,TRAF3,ID…
1	!	3.76e-10	207	993	38	0.038	0.184	GO:1901617	BP	6	organic hydroxy compound biosynthetic process	4	CYP51,DDT,POR,MVD,SREBF1,NR1D1,FDFT1,HMGCR,DHFR,SQLE,CYP39A1,STARD4,IMPA2,HSD17B7,NR4A2,ITPKA,BMP2,SLC27A2,PMVK,SLC27A5,ACER3,NSDHL,MSMO1,SC5D,APOA5,LSS,FGF1,AKR1D1,BMP6,MVK,INSIG1,CES1D,DHCR7,PTK2B,TRP53,FDPS,CYP2D22,HMGCS1
1	!	1.03e-07	123	993	26	0.026	0.211	GO:0046165	BP	6	alcohol biosynthetic process	5	CYP51,POR,MVD,SREBF1,FDFT1,HMGCR,DHFR,IMPA2,HSD17B7,ITPKA,BMP2,PMVK,ACER3,NSDHL,SC5D,APOA5,LSS,FGF1,BMP6,MVK,INSIG1,CES1D,DHCR7,PTK2B,FDPS,HMGCS1
1	!	3.19e-11	44	993	19	0.019	0.432	GO:1902653	BP	6	secondary alcohol biosynthetic process	6	CYP51,POR,MVD,SREBF1,FDFT1,HMGCR,HSD17B7,PMVK,NSDHL,SC5D,APOA5,LSS,FGF1,MVK,INSIG1,CES1D,DHCR7,FDPS,HMGCS1
1	!	1.21e-06	5794	993	348	0.35	0.06	GO:1901360	BP	6	organic cyclic compound metabolic process	3	KAT2B,SP1,CYP51,DDT,IL16,SMO,NACC1,PSMC3,DAXX,HLTF,IKZF4,MCM2,LIPE,CYP17A1,CALR,PHB2,AQP1,PRKACA,POR,NR1I3,CS,ELOVL1,MVD,CAV1,CARHSP1,BMP7,DMAP1,RDM1,WNT2,MED15,RPA3,SLC25A13,ABCA1,CLPX,HSD11B1,MAPKAPK2,CMAH,EXOSC10,MAFK,SRSF1,ATP5G3,PELP1,E2F2,ATP6V0A1,PDK4,CRY1,NFYB,TNIP1,BTG2,IGFBP3,SREBF1,NAMPT,NBAS,NCOA1,PSMC5,GALK1,TEN1,NR1D1,ACLY,STAT5B,DCAF4,FOS,FDFT1,TRAF3,SLC17A1,ID4,WRNIP1,NSD1,TERT,XR…
1	!	0.000457	4212	993	255	0.257	0.061	GO:1901362	BP	6	organic cyclic compound biosynthetic process	4	KAT2B,SP1,CYP51,DDT,IL16,SMO,NACC1,PSMC3,DAXX,HLTF,IKZF4,LIPE,CYP17A1,CALR,PHB2,AQP1,POR,NR1I3,ELOVL1,MVD,CAV1,CARHSP1,BMP7,DMAP1,WNT2,MED15,SLC25A13,HSD11B1,EXOSC10,MAFK,ATP5G3,PELP1,E2F2,ATP6V0A1,PDK4,CRY1,NFYB,TNIP1,BTG2,SREBF1,NAMPT,NCOA1,PSMC5,GALK1,TEN1,NR1D1,ACLY,STAT5B,FOS,FDFT1,TRAF3,ID4,WRNIP1,NSD1,TERT,HMGCR,DHFR,TSC22D1,NADK2,SQLE,PPARA,L3MBTL2,SREBF2,IL1RAP,CYC1,PMM2,NR1I2,EIF4A2,APP…
1	!	0.000236	1023	993	84	0.085	0.082	GO:1901135	BP	6	carbohydrate derivative metabolic process	3	AQP1,CS,ELOVL1,MVD,ST3GAL1,SLC25A13,CLPX,HSD11B1,CMAH,ATP5G3,ATP6V0A1,PDK4,TNIP1,GALK1,ACLY,GPLD1,ACOT12,HMGCR,RNASEH2B,NDUFB9,PPARA,CYC1,TYMP,PMM2,ST3GAL6,EHHADH,PIGX,PIM1,FASN,NDUFB8,TALDO1,TK1,ATP5C1,APCS,MPC2,KYNU,BMP2,AHCY,PMVK,VCP,ST3GAL3,GALE,EXTL1,PGD,SLC25A33,UGDH,SULT1B1,DCK,AHCYL2,ABCG2,LYVE1,NUDT7,ST3GAL4,GORASP1,ACPP,RAMP1,TMEM5,ACOT11,GALT,ATP5L,ASGR2,GCK,MVK,ACACB,DCTPP1,PXYLP1,DPY…
1	!	4.26e-05	538	993	55	0.055	0.102	GO:0005975	BP	6	carbohydrate metabolic process	3	KAT2B,CS,SLC3A2,ST3GAL1,HSD11B1,PDK4,CRY1,IGFBP3,GALK1,NR1D1,PPARA,PMM2,ST3GAL6,SYNJ2,TFF3,PCDH12,IMPA2,RBP4,GSTO1,TALDO1,IGFBP5,SLC45A3,ATF3,SORD,ITPKA,RORC,NANS,ST3GAL3,GALE,SESN2,PGD,ABCG2,IDH2,PGM2L1,LCMT1,ST3GAL4,TREH,UGT2A3,GALT,PIK3R1,SERPINA12,GCK,ACACB,MGAT2,PRKCE,LEPR,PTK2B,TRP53,MUP11,MLYCD,G6PC,MUP18,MUP16,MUP9,MUP12
1	!	9.06e-07	254	993	37	0.037	0.146	GO:0005996	BP	6	monosaccharide metabolic process	4	KAT2B,PDK4,CRY1,IGFBP3,GALK1,NR1D1,PPARA,PMM2,TFF3,RBP4,GSTO1,IGFBP5,SLC45A3,ATF3,SORD,RORC,GALE,SESN2,PGD,PGM2L1,LCMT1,UGT2A3,GALT,PIK3R1,SERPINA12,GCK,ACACB,PRKCE,LEPR,TRP53,MUP11,MLYCD,G6PC,MUP18,MUP16,MUP9,MUP12
1	!	5.44e-06	223	993	33	0.033	0.148	GO:0019318	BP	6	hexose metabolic process	5	KAT2B,PDK4,CRY1,IGFBP3,GALK1,NR1D1,PPARA,PMM2,TFF3,RBP4,IGFBP5,SLC45A3,ATF3,SORD,RORC,GALE,SESN2,PGM2L1,LCMT1,GALT,PIK3R1,SERPINA12,GCK,ACACB,LEPR,TRP53,MUP11,MLYCD,G6PC,MUP18,MUP16,MUP9,MUP12
1	!	7.82e-05	188	993	28	0.028	0.149	GO:0006006	BP	6	glucose metabolic process	6	KAT2B,PDK4,CRY1,IGFBP3,NR1D1,PPARA,TFF3,RBP4,IGFBP5,SLC45A3,ATF3,RORC,SESN2,PGM2L1,LCMT1,PIK3R1,SERPINA12,GCK,ACACB,LEPR,TRP53,MUP11,MLYCD,G6PC,MUP18,MUP16,MUP9,MUP12
1	!	0.0126	188	993	24	0.024	0.128	GO:0016051	BP	6	carbohydrate biosynthetic process	4	KAT2B,CRY1,NR1D1,PPARA,IMPA2,RBP4,GSTO1,ATF3,SORD,NANS,SESN2,PGD,ST3GAL4,SERPINA12,GCK,MGAT2,LEPR,PTK2B,MUP11,G6PC,MUP18,MUP16,MUP9,MUP12
1	!	2.04e-05	86	993	19	0.019	0.221	GO:0046364	BP	6	monosaccharide biosynthetic process	5	KAT2B,CRY1,NR1D1,PPARA,RBP4,GSTO1,ATF3,SORD,SESN2,PGD,SERPINA12,GCK,LEPR,MUP11,G6PC,MUP18,MUP16,MUP9,MUP12
1	!	0.00023	80	993	17	0.017	0.212	GO:0019319	BP	6	hexose biosynthetic process	6	KAT2B,CRY1,NR1D1,PPARA,RBP4,ATF3,SORD,SESN2,SERPINA12,GCK,LEPR,MUP11,G6PC,MUP18,MUP16,MUP9,MUP12
1	!	0.000765	77	993	16	0.016	0.208	GO:0006094	BP	6	gluconeogenesis	7	KAT2B,CRY1,NR1D1,PPARA,RBP4,ATF3,SESN2,SERPINA12,GCK,LEPR,MUP11,G6PC,MUP18,MUP16,MUP9,MUP12
1	!	0.000387	167	993	25	0.025	0.15	GO:0006109	BP	6	regulation of carbohydrate metabolic process	4	KAT2B,HSD11B1,PDK4,IGFBP3,NR1D1,PPARA,TFF3,IGFBP5,SLC45A3,RORC,SESN2,LCMT1,SERPINA12,GCK,ACACB,PRKCE,LEPR,PTK2B,TRP53,MUP11,MLYCD,MUP18,MUP16,MUP9,MUP12
1	!	3.47e-20	1216	993	137	0.138	0.113	GO:0006629	BP	6	lipid metabolic process	3	SCPEP1,CYP51,ANGPTL4,LIPE,CYP17A1,POR,ELOVL1,MVD,CAV1,MID1IP1,RARRES2,KDSR,PLIN5,ABCA1,HSD11B1,PDK4,AVPR1A,SREBF1,NR1D1,ACLY,STAT5B,FDFT1,GPLD1,ECI2,ACOT12,HMGCR,ACOX2,HACL1,SQLE,PPARA,SREBF2,ST3GAL6,EHHADH,APP,SERINC2,PIGX,SYNJ2,ACAT2,CYP39A1,STARD4,IMPA2,FADS3,LIPA,RBP4,FASN,PI4K2A,ABHD6,PDGFA,ACADL,SLC45A3,HSD17B7,HSD17B12,CRLS1,BMP2,SLC27A2,LPIN3,SCHIP1,PMVK,RORC,CYP4A31,SESN2,FAM126A,SULT1B1…
1	!	3.8e-16	263	993	52	0.052	0.198	GO:0008202	BP	6	steroid metabolic process	4	CYP51,LIPE,CYP17A1,POR,MVD,ABCA1,HSD11B1,SREBF1,NR1D1,STAT5B,FDFT1,HMGCR,SQLE,SREBF2,APP,CYP39A1,STARD4,LIPA,HSD17B7,HSD17B12,BMP2,SLC27A2,SCHIP1,PMVK,RORC,SULT1B1,HSD17B11,SLC27A5,NSDHL,FGFR1,MSMO1,HSD17B2,SC5D,APOA5,LDLR,LSS,CEBPA,FGF1,AKR1D1,BMP6,ATP8B1,SERPINA12,MVK,PCSK9,INSIG1,CES1D,LEPR,DHCR7,FDPS,CYP2D22,G6PC,HMGCS1
1	!	3.34e-14	118	993	33	0.033	0.28	GO:0016125	BP	6	sterol metabolic process	5	CYP51,LIPE,POR,MVD,ABCA1,SREBF1,FDFT1,HMGCR,SQLE,SREBF2,APP,CYP39A1,LIPA,HSD17B7,PMVK,NSDHL,MSMO1,SC5D,APOA5,LDLR,LSS,CEBPA,FGF1,AKR1D1,SERPINA12,MVK,PCSK9,INSIG1,CES1D,LEPR,DHCR7,FDPS,HMGCS1
1	!	1.91e-13	109	993	31	0.031	0.284	GO:0008203	BP	6	cholesterol metabolic process	6	CYP51,LIPE,POR,MVD,ABCA1,SREBF1,FDFT1,HMGCR,SQLE,SREBF2,APP,CYP39A1,HSD17B7,PMVK,NSDHL,SC5D,APOA5,LDLR,LSS,CEBPA,FGF1,AKR1D1,SERPINA12,MVK,PCSK9,INSIG1,CES1D,LEPR,DHCR7,FDPS,HMGCS1
1	!	0.0028	275	993	32	0.032	0.116	GO:0016042	BP	6	lipid catabolic process	4	LIPE,RARRES2,PLIN5,HSD11B1,ECI2,ACOX2,HACL1,EHHADH,ACAT2,CYP39A1,LIPA,ABHD6,ACADL,SLC27A2,LPIN3,CYP4A31,SESN2,HSD17B11,PLBD2,APOA5,LDLR,ETFA,PNPLA7,AKR1D1,PNPLA3,ACACB,ADORA1,PRKCE,HCAR2,CES1D,CYP4A32,MLYCD
1	!	5.49e-12	541	993	70	0.07	0.129	GO:0008610	BP	6	lipid biosynthetic process	4	CYP51,CYP17A1,POR,ELOVL1,MVD,MID1IP1,KDSR,PLIN5,HSD11B1,PDK4,AVPR1A,SREBF1,NR1D1,ACLY,FDFT1,HMGCR,SQLE,PIGX,CYP39A1,STARD4,FADS3,FASN,PI4K2A,ABHD6,PDGFA,SLC45A3,HSD17B7,HSD17B12,CRLS1,BMP2,SLC27A2,LPIN3,PMVK,HSD17B11,PRKAB1,ATG7,SLC27A5,CDIPT,ACER3,NSDHL,MSMO1,HSD17B2,SC5D,ST3GAL4,APOA5,LDLR,LSS,FGF1,DECR2,AKR1D1,BMP6,PIK3R1,SERPINA12,PNPLA3,MVK,ACACB,FADS6,INSIG1,AGMO,CES1D,DHCR7,FDPS,ETNK2,MUP1…
1	!	1.4e-11	151	993	34	0.034	0.225	GO:0006694	BP	6	steroid biosynthetic process	5	CYP51,CYP17A1,POR,MVD,HSD11B1,SREBF1,NR1D1,FDFT1,HMGCR,SQLE,CYP39A1,STARD4,HSD17B7,HSD17B12,BMP2,SLC27A2,PMVK,HSD17B11,SLC27A5,NSDHL,MSMO1,HSD17B2,SC5D,APOA5,LSS,FGF1,AKR1D1,BMP6,MVK,INSIG1,CES1D,DHCR7,FDPS,HMGCS1
1	!	2.51e-12	50	993	21	0.021	0.42	GO:0016126	BP	6	sterol biosynthetic process	6	CYP51,POR,MVD,SREBF1,FDFT1,HMGCR,SQLE,HSD17B7,PMVK,NSDHL,MSMO1,SC5D,APOA5,LSS,FGF1,MVK,INSIG1,CES1D,DHCR7,FDPS,HMGCS1
1	!	1.89e-11	43	993	19	0.019	0.442	GO:0006695	BP	6	cholesterol biosynthetic process	7	CYP51,POR,MVD,SREBF1,FDFT1,HMGCR,HSD17B7,PMVK,NSDHL,SC5D,APOA5,LSS,FGF1,MVK,INSIG1,CES1D,DHCR7,FDPS,HMGCS1
1	!	9.46e-07	327	993	43	0.043	0.131	GO:0019216	BP	6	regulation of lipid metabolic process	4	ANGPTL4,CYP17A1,POR,CAV1,MID1IP1,RARRES2,PLIN5,PDK4,AVPR1A,SREBF1,NR1D1,STAT5B,PPARA,STARD4,ABHD6,PDGFA,SLC45A3,BMP2,RORC,ATG7,APOA5,LDLR,FGF1,BMP6,PIK3R1,SERPINA12,ACACB,ADORA1,PRKCE,INSIG1,HCAR2,OPA3,FGFR3,CES1G,DHCR7,PTK2B,FDPS,MUP11,MLYCD,MUP18,MUP16,MUP9,MUP12
1	!	0.0144	95	993	16	0.016	0.168	GO:0019218	BP	6	regulation of steroid metabolic process	5	CYP17A1,POR,SREBF1,NR1D1,STAT5B,STARD4,BMP2,RORC,APOA5,LDLR,FGF1,BMP6,SERPINA12,INSIG1,DHCR7,FDPS
1	!	3.73e-05	9669	993	523	0.527	0.054	GO:0006807	BP	6	nitrogen compound metabolic process	2	SCPEP1,KAT2B,SNAPIN,LGALS9,SP1,SRR,STK38L,DDT,IL16,SMO,CAPNS1,NACC1,PSMC3,DAXX,HLTF,IKZF4,MCM2,LIPE,FKBP11,RPS11,INMT,CALR,MMD,PHB2,AQP1,PRKACA,POR,NR1I3,CS,RPS9,GCAT,ELOVL1,MVD,PPP2R1A,CAV1,CARHSP1,RPS18,GPRC5B,BMP7,RARRES2,DMAP1,KDSR,RDM1,WNT2,FUZ,MED15,RPA3,RPS5,ATRAID,ST3GAL1,DNAJB9,SLC25A13,ABCA1,CLPX,HSD11B1,LONRF3,MAPKAPK2,CMAH,TTLL12,EXOSC10,SGK2,MAFK,SRSF1,ATP5G3,SLC22A5,PELP1,E2F2,ATP6V…
1	!	8.39e-10	6474	993	397	0.4	0.061	GO:1901564	BP	6	organonitrogen compound metabolic process	3	SCPEP1,KAT2B,SNAPIN,LGALS9,SRR,STK38L,DDT,CAPNS1,PSMC3,DAXX,HLTF,FKBP11,RPS11,INMT,CALR,MMD,PHB2,AQP1,PRKACA,POR,CS,RPS9,GCAT,ELOVL1,MVD,PPP2R1A,CAV1,RPS18,GPRC5B,BMP7,RARRES2,DMAP1,KDSR,FUZ,RPS5,ATRAID,ST3GAL1,DNAJB9,SLC25A13,ABCA1,CLPX,HSD11B1,LONRF3,MAPKAPK2,TTLL12,SGK2,ATP5G3,SLC22A5,ATP6V0A1,PDK4,UBXN6,SGK1,ARG1,VNN3,CRY1,MKNK2,CABIN1,TNIP1,BTG2,IGFBP3,SREBF1,NAMPT,RNF144A,NCOA1,PSMC5,PECAM1…
1	!	2.01e-07	1619	993	130	0.131	0.08	GO:1901566	BP	6	organonitrogen compound biosynthetic process	4	SRR,RPS11,CALR,AQP1,RPS9,ELOVL1,RPS18,KDSR,RPS5,ST3GAL1,SLC25A13,ABCA1,ATP5G3,ATP6V0A1,PDK4,ARG1,MKNK2,TNIP1,BTG2,NAMPT,MIF4GD,GALK1,ACLY,STAT5B,DHFR,NADK2,PPARA,IL1RAP,CYC1,PMM2,ST3GAL6,EIF4A2,APP,PIGX,CBS,EIF2AK2,RPS14,RPS24,PAIP1,PAOX,CPEB1,ATP5C1,IGFBP5,FARSB,AGXT,MPC2,EPRS,NR4A2,KYNU,NMI,GATM,AHCY,GCLM,CTH,RPS20,VCP,ST3GAL3,GALE,EXTL1,SESN2,RPL22,MTHFR,UGDH,MTHFD2L,MMAB,ASNS,ATG7,IDH2,QPRT,A…
1	!	6.95e-17	10036	993	595	0.599	0.059	GO:0044237	BP	6	cellular metabolic process	2	SCPEP1,KAT2B,SNAPIN,LGALS9,SP1,SRR,STK38L,DDT,IL16,SMO,NACC1,PSMC3,DAXX,HLTF,IKZF4,MCM2,LIPE,FKBP11,RPS11,CYP17A1,CALR,MMD,PHB2,AQP1,PRKACA,POR,NR1I3,CS,RPS9,GCAT,ELOVL1,MVD,PPP2R1A,CAV1,MID1IP1,CARHSP1,RPS18,GPRC5B,BMP7,RARRES2,DMAP1,KDSR,RDM1,WNT2,PLIN5,FUZ,MED15,RPA3,RPS5,ATRAID,ST3GAL1,DNAJB9,SLC25A13,ABCA1,CLPX,HSD11B1,LONRF3,MAPKAPK2,CMAH,TTLL12,EXOSC10,SGK2,MAFK,SRSF1,ATP5G3,SLC22A5,PELP1,…
1	!	0.000125	1813	993	131	0.132	0.072	GO:0044248	BP	6	cellular catabolic process	3	SCPEP1,SNAPIN,PSMC3,LIPE,PRKACA,POR,GCAT,CARHSP1,PLIN5,ATRAID,DNAJB9,CLPX,HSD11B1,LONRF3,MAPKAPK2,EXOSC10,ATP6V0A1,UBXN6,ARG1,BTG2,IGFBP3,SREBF1,NBAS,RNF144A,PXDN,PSMC5,GALK1,NR1D1,GPLD1,ECI2,ACOX2,HACL1,RNASEH2B,BNIP3L,PPARA,ARSA,NR1I2,EHHADH,ACAT2,CYP39A1,CBS,ALDH1A7,ATG2A,CAPN1,TRIM8,GSTO1,CPN1,ABHD6,PAOX,ACADL,RHBDD1,AGXT,SCLY,TOR1A,KYNU,PSMD14,UBE2L6,SORD,SLC27A2,LPIN3,AHCY,GSTM4,RAD23B,UBAP…
1	!	9.49e-07	6149	993	366	0.369	0.06	GO:0034641	BP	6	cellular nitrogen compound metabolic process	3	KAT2B,SP1,IL16,SMO,NACC1,PSMC3,DAXX,HLTF,IKZF4,MCM2,LIPE,RPS11,CALR,PHB2,AQP1,PRKACA,POR,NR1I3,CS,RPS9,ELOVL1,MVD,CAV1,CARHSP1,RPS18,BMP7,DMAP1,RDM1,WNT2,MED15,RPA3,RPS5,SLC25A13,CLPX,HSD11B1,MAPKAPK2,CMAH,EXOSC10,MAFK,SRSF1,ATP5G3,SLC22A5,PELP1,E2F2,ATP6V0A1,PDK4,ARG1,VNN3,CRY1,MKNK2,NFYB,TNIP1,BTG2,IGFBP3,SREBF1,NAMPT,NBAS,NCOA1,PSMC5,MIF4GD,GALK1,TEN1,NR1D1,ACLY,STAT5B,DCAF4,FOS,TRAF3,SLC17A1,…
1	!	1.03e-11	987	993	102	0.103	0.103	GO:0043603	BP	6	cellular amide metabolic process	4	RPS11,CALR,CS,RPS9,ELOVL1,MVD,RPS18,RPS5,HSD11B1,PDK4,ARG1,VNN3,MKNK2,BTG2,MIF4GD,ACLY,STAT5B,ACOT12,DHFR,EHHADH,EIF4A2,APP,EIF2AK2,RPS14,GSTO1,FASN,CPN1,RPS24,PAIP1,CPEB1,IGFBP5,FARSB,MPC2,EPRS,KYNU,GSTM4,PMVK,GCLM,CTH,RPS20,SESN2,RPL22,MTHFR,MTHFD2L,ASNS,NAT8,ACER3,RBM3,NUDT7,AARS,BACE1,IREB2,GSTA4,CTSH,EEFSEC,GSTT2,ACOT11,RPS29,CEBPA,EIF1,RPS16,RPL10A,FAU,RPL12,RPL22L1,THBS1,GGT6,MRPS27,MVK,AC…
1	!	2.88e-05	771	993	71	0.072	0.092	GO:0006518	BP	6	peptide metabolic process	5	RPS11,CALR,RPS9,RPS18,RPS5,MKNK2,BTG2,MIF4GD,DHFR,EIF4A2,APP,EIF2AK2,RPS14,GSTO1,CPN1,RPS24,PAIP1,CPEB1,IGFBP5,FARSB,EPRS,GSTM4,GCLM,CTH,RPS20,SESN2,RPL22,NAT8,RBM3,AARS,BACE1,IREB2,GSTA4,CTSH,EEFSEC,GSTT2,RPS29,EIF1,RPS16,RPL10A,FAU,RPL12,RPL22L1,THBS1,GGT6,MRPS27,MVK,ZC3H12A,NGRN,RPL9,RPS8,RPS23,RPS27RT,BCL3,IMMP2L,IDE,NPM1,PUS7,RPL32,PTK2B,RPS7,RPS12,RPL35,ETHE1,NCK2,RPS28,SARS2,RPL13A,RPL39,R…
1	!	0.0483	93	993	15	0.015	0.161	GO:0034754	BP	6	cellular hormone metabolic process	3	SCPEP1,CYP17A1,STAT5B,RBP4,HSD17B7,HSD17B12,BMP2,SCHIP1,HSD17B11,HSD17B2,AKR1D1,BMP6,RETSAT,CYP2D22,RDH11
1	!	7.17e-12	274	993	47	0.047	0.172	GO:0006790	BP	6	sulfur compound metabolic process	3	SP1,CS,ELOVL1,MVD,PDK4,ARSG,ACLY,STAT5B,ACOT12,EHHADH,CBS,GSTO1,FASN,AGXT,MPC2,KYNU,AHCY,GSTM4,PMVK,GCLM,CTH,MTHFR,SULT1B1,SULT1D1,MTHFD2L,AHCYL2,NAT8,NOX4,NUDT7,GSTA4,ACPP,GSTT2,ACOT11,GGT6,MVK,ACACB,ACOT4,MAT2A,CES1D,GLYAT,ETHE1,GM5096,ACNAT1,MPST,ACOT1,MLYCD,BHMT
1	!	1.34e-07	81	993	21	0.021	0.259	GO:0035383	BP	6	thioester metabolic process	4	CS,ELOVL1,MVD,PDK4,ACLY,ACOT12,EHHADH,FASN,MPC2,KYNU,PMVK,NUDT7,ACOT11,MVK,ACACB,ACOT4,CES1D,GLYAT,ACNAT1,ACOT1,MLYCD
1	!	0.000111	3062	993	199	0.2	0.065	GO:0006793	BP	6	phosphorus metabolic process	3	KAT2B,LGALS9,STK38L,DDT,DAXX,MMD,PHB2,AQP1,PRKACA,CS,ELOVL1,MVD,PPP2R1A,CAV1,GPRC5B,BMP7,RARRES2,ST3GAL1,SLC25A13,CLPX,HSD11B1,MAPKAPK2,CMAH,SGK2,ATP5G3,ATP6V0A1,PDK4,SGK1,CRY1,MKNK2,CABIN1,TNIP1,IGFBP3,NAMPT,PECAM1,GALK1,ACLY,FDFT1,GPLD1,NSD1,ACOT12,HMGCR,PLAU,RNASEH2B,NADK2,NDUFB9,PPARA,TAB1,CYC1,EHHADH,HRG,APP,RCAN1,SERINC2,PIGX,SYNJ2,PIM1,CBS,EIF2AK2,NELFE,IMPA2,FASN,PI4K2A,NDUFB8,ABHD6,PTPRJ…
1	!	0.00029	3044	993	196	0.197	0.064	GO:0006796	BP	6	phosphate-containing compound metabolic process	4	KAT2B,LGALS9,STK38L,DDT,DAXX,MMD,PHB2,AQP1,PRKACA,CS,ELOVL1,MVD,PPP2R1A,CAV1,GPRC5B,BMP7,RARRES2,ST3GAL1,SLC25A13,CLPX,HSD11B1,MAPKAPK2,SGK2,ATP5G3,ATP6V0A1,PDK4,SGK1,CRY1,MKNK2,CABIN1,TNIP1,IGFBP3,NAMPT,PECAM1,GALK1,ACLY,FDFT1,GPLD1,NSD1,ACOT12,HMGCR,PLAU,RNASEH2B,NADK2,NDUFB9,PPARA,TAB1,CYC1,EHHADH,HRG,APP,RCAN1,SERINC2,PIGX,SYNJ2,PIM1,CBS,EIF2AK2,NELFE,IMPA2,FASN,PI4K2A,NDUFB8,ABHD6,PTPRJ,AATK…
1	!	4.98e-07	942	993	87	0.088	0.092	GO:0019637	BP	6	organophosphate metabolic process	4	AQP1,CS,ELOVL1,MVD,SLC25A13,CLPX,HSD11B1,ATP5G3,ATP6V0A1,PDK4,NAMPT,GALK1,ACLY,FDFT1,GPLD1,ACOT12,HMGCR,RNASEH2B,NADK2,NDUFB9,PPARA,CYC1,EHHADH,SERINC2,PIGX,SYNJ2,IMPA2,FASN,PI4K2A,NDUFB8,ABHD6,TALDO1,TK1,ATP5C1,PDGFA,MPC2,KYNU,ITPKA,CRLS1,PMVK,VCP,GALE,PGD,SLC25A33,FAM126A,SULT1B1,DCK,MTHFD2L,IDH2,QPRT,CDIPT,NUDT7,APOA5,LDLR,NMNAT3,ACPP,GDE1,ACOT11,ATP5L,FMO2,FMO1,PIK3R1,PNPLA3,PI4KA,GCK,MVK,ACA…
1	!	0.0354	490	993	44	0.044	0.09	GO:0090407	BP	6	organophosphate biosynthetic process	5	AQP1,ELOVL1,MVD,SLC25A13,ATP5G3,ATP6V0A1,PDK4,NAMPT,GALK1,ACLY,NADK2,PPARA,CYC1,PIGX,PI4K2A,TK1,ATP5C1,PDGFA,MPC2,KYNU,ITPKA,CRLS1,PMVK,VCP,GALE,DCK,MTHFD2L,IDH2,QPRT,CDIPT,NMNAT3,ATP5L,PIK3R1,PNPLA3,GCK,MVK,ACACB,ATP5K,PTK2B,TRP53,FDPS,MOCS1,ETNK2,MLYCD
1	!	3.09e-05	448	993	49	0.049	0.109	GO:0019693	BP	6	ribose phosphate metabolic process	5	AQP1,CS,ELOVL1,MVD,SLC25A13,CLPX,HSD11B1,ATP5G3,ATP6V0A1,PDK4,GALK1,ACLY,ACOT12,HMGCR,RNASEH2B,NDUFB9,PPARA,CYC1,EHHADH,FASN,NDUFB8,TALDO1,ATP5C1,MPC2,KYNU,PMVK,VCP,GALE,PGD,SLC25A33,SULT1B1,NUDT7,ACOT11,ATP5L,GCK,MVK,ACACB,ATP5K,COA6,ACOT4,CES1D,TRP53,GLYAT,UQCRH,MOCS1,ACNAT1,NDUFB6,ACOT1,MLYCD
1	!	5.32e-11	464	993	62	0.062	0.134	GO:0051186	BP	6	cofactor metabolic process	3	CS,ELOVL1,MVD,HSD11B1,PDK4,VNN3,NAMPT,PXDN,GALK1,ACLY,STAT5B,ACOT12,HMGCR,DHFR,NADK2,PPARA,EHHADH,GSTO1,FASN,TALDO1,MPC2,KYNU,AHCY,GSTM4,PMVK,GCLM,CTH,VCP,GALE,PGD,MTHFR,MTHFD2L,MMAB,AHCYL2,NAT8,IDH2,QPRT,NUDT7,IREB2,GSTA4,NMNAT3,GSTT2,ACOT11,RSAD1,FMO2,FMO1,GGT6,GCK,MVK,ACACB,ACOT4,MAT2A,CES1D,TRP53,GLYAT,MOCS1,ETHE1,MTHFS,ACNAT1,ACOT1,GGH,MLYCD
1	!	3.39e-11	307	993	49	0.049	0.16	GO:0006732	BP	6	coenzyme metabolic process	4	CS,ELOVL1,MVD,HSD11B1,PDK4,VNN3,NAMPT,GALK1,ACLY,ACOT12,HMGCR,DHFR,NADK2,PPARA,EHHADH,GSTO1,FASN,TALDO1,MPC2,KYNU,AHCY,PMVK,VCP,GALE,PGD,MTHFR,MTHFD2L,AHCYL2,IDH2,QPRT,NUDT7,NMNAT3,ACOT11,FMO2,FMO1,GCK,MVK,ACACB,ACOT4,MAT2A,CES1D,TRP53,GLYAT,MOCS1,MTHFS,ACNAT1,ACOT1,GGH,MLYCD
1	!	0.00705	5574	993	315	0.317	0.057	GO:0046483	BP	6	heterocycle metabolic process	3	KAT2B,SP1,IL16,SMO,NACC1,PSMC3,DAXX,HLTF,IKZF4,MCM2,LIPE,CALR,PHB2,AQP1,PRKACA,NR1I3,CS,ELOVL1,MVD,CAV1,CARHSP1,BMP7,DMAP1,RDM1,WNT2,MED15,RPA3,SLC25A13,CLPX,HSD11B1,MAPKAPK2,CMAH,EXOSC10,MAFK,SRSF1,ATP5G3,PELP1,E2F2,ATP6V0A1,PDK4,CRY1,NFYB,TNIP1,BTG2,IGFBP3,SREBF1,NAMPT,NBAS,NCOA1,PSMC5,GALK1,TEN1,NR1D1,ACLY,STAT5B,DCAF4,FOS,TRAF3,SLC17A1,ID4,WRNIP1,NSD1,TERT,XRCC4,ACOT12,HMGCR,DHFR,RNASEH2B,TSC…
1	!	0.00433	5627	993	319	0.321	0.057	GO:0006725	BP	6	cellular aromatic compound metabolic process	3	KAT2B,SP1,DDT,IL16,SMO,NACC1,PSMC3,DAXX,HLTF,IKZF4,MCM2,LIPE,CALR,PHB2,AQP1,PRKACA,NR1I3,CS,ELOVL1,MVD,CAV1,CARHSP1,BMP7,DMAP1,RDM1,WNT2,MED15,RPA3,SLC25A13,CLPX,HSD11B1,MAPKAPK2,CMAH,EXOSC10,MAFK,SRSF1,ATP5G3,PELP1,E2F2,ATP6V0A1,PDK4,CRY1,NFYB,TNIP1,BTG2,IGFBP3,SREBF1,NAMPT,NBAS,NCOA1,PSMC5,GALK1,TEN1,NR1D1,ACLY,STAT5B,DCAF4,FOS,TRAF3,SLC17A1,ID4,WRNIP1,NSD1,TERT,XRCC4,ACOT12,HMGCR,DHFR,RNASEH2B…
1	!	7.99e-06	485	993	53	0.053	0.109	GO:0072521	BP	6	purine-containing compound metabolic process	4	AQP1,CS,ELOVL1,MVD,SLC25A13,CLPX,ATP5G3,ATP6V0A1,PDK4,GALK1,ACLY,SLC17A1,ACOT12,HMGCR,NDUFB9,PPARA,CYC1,EHHADH,FASN,NDUFB8,ATP5C1,MPC2,KYNU,AHCY,PMVK,VCP,GALE,SLC25A33,SULT1B1,MTHFD2L,AHCYL2,NUDT7,ACPP,ACOT11,ATP5L,GCK,MVK,ACACB,ATP5K,COA6,ACOT4,CES1D,TRP53,GLYAT,UQCRH,MOCS1,AOX3,MACROD2,ACNAT1,NDUFB6,ACOT1,MLYCD,G6PC
1	!	0.0348	5447	993	304	0.306	0.056	GO:0006139	BP	6	nucleobase-containing compound metabolic process	4	KAT2B,SP1,IL16,SMO,NACC1,PSMC3,DAXX,HLTF,IKZF4,MCM2,LIPE,CALR,PHB2,AQP1,PRKACA,NR1I3,CS,ELOVL1,MVD,CAV1,CARHSP1,BMP7,DMAP1,RDM1,WNT2,MED15,RPA3,SLC25A13,CLPX,HSD11B1,MAPKAPK2,CMAH,EXOSC10,MAFK,SRSF1,ATP5G3,PELP1,E2F2,ATP6V0A1,PDK4,CRY1,NFYB,TNIP1,BTG2,IGFBP3,SREBF1,NAMPT,NBAS,NCOA1,PSMC5,GALK1,TEN1,NR1D1,ACLY,STAT5B,DCAF4,FOS,TRAF3,ID4,WRNIP1,NSD1,TERT,XRCC4,ACOT12,HMGCR,RNASEH2B,TSC22D1,MBNL2,NA…
1	!	1.45e-08	649	993	71	0.072	0.109	GO:0055086	BP	6	nucleobase-containing small molecule metabolic process	5	AQP1,CS,ELOVL1,MVD,SLC25A13,CLPX,HSD11B1,CMAH,ATP5G3,ATP6V0A1,PDK4,NAMPT,GALK1,ACLY,ACOT12,HMGCR,RNASEH2B,NADK2,NDUFB9,PPARA,CYC1,TYMP,PMM2,EHHADH,FASN,NDUFB8,TALDO1,TK1,ATP5C1,MPC2,KYNU,AHCY,PMVK,VCP,GALE,PGD,SLC25A33,UGDH,SULT1B1,DCK,MTHFD2L,AHCYL2,IDH2,QPRT,CDIPT,NUDT7,NMNAT3,ACPP,ACOT11,GALT,ATP5L,FMO2,FMO1,GCK,MVK,ACACB,DCTPP1,ATP5K,COA6,ACOT4,CES1D,TRP53,GLYAT,UQCRH,MOCS1,AOX3,MACROD2,ACNAT…
1	!	7.01e-07	577	993	62	0.062	0.107	GO:0006753	BP	6	nucleoside phosphate metabolic process	6	AQP1,CS,ELOVL1,MVD,SLC25A13,CLPX,HSD11B1,ATP5G3,ATP6V0A1,PDK4,NAMPT,GALK1,ACLY,ACOT12,HMGCR,RNASEH2B,NADK2,NDUFB9,PPARA,CYC1,EHHADH,FASN,NDUFB8,TALDO1,TK1,ATP5C1,MPC2,KYNU,PMVK,VCP,GALE,PGD,SLC25A33,SULT1B1,DCK,MTHFD2L,IDH2,QPRT,CDIPT,NUDT7,NMNAT3,ACPP,ACOT11,ATP5L,FMO2,FMO1,GCK,MVK,ACACB,DCTPP1,ATP5K,COA6,ACOT4,CES1D,TRP53,GLYAT,UQCRH,MOCS1,ACNAT1,NDUFB6,ACOT1,MLYCD
1	!	1.47e-07	98	993	23	0.023	0.235	GO:0033865	BP	6	nucleoside bisphosphate metabolic process	7	CS,ELOVL1,MVD,PDK4,ACLY,ACOT12,HMGCR,EHHADH,FASN,MPC2,KYNU,PMVK,SULT1B1,NUDT7,ACOT11,MVK,ACACB,ACOT4,CES1D,GLYAT,ACNAT1,ACOT1,MLYCD
1	!	1.47e-07	98	993	23	0.023	0.235	GO:0033875	BP	6	ribonucleoside bisphosphate metabolic process	8	CS,ELOVL1,MVD,PDK4,ACLY,ACOT12,HMGCR,EHHADH,FASN,MPC2,KYNU,PMVK,SULT1B1,NUDT7,ACOT11,MVK,ACACB,ACOT4,CES1D,GLYAT,ACNAT1,ACOT1,MLYCD
1	!	1.47e-07	98	993	23	0.023	0.235	GO:0034032	BP	6	purine nucleoside bisphosphate metabolic process	8	CS,ELOVL1,MVD,PDK4,ACLY,ACOT12,HMGCR,EHHADH,FASN,MPC2,KYNU,PMVK,SULT1B1,NUDT7,ACOT11,MVK,ACACB,ACOT4,CES1D,GLYAT,ACNAT1,ACOT1,MLYCD
1	!	4.58e-07	571	993	62	0.062	0.109	GO:0009117	BP	6	nucleotide metabolic process	7	AQP1,CS,ELOVL1,MVD,SLC25A13,CLPX,HSD11B1,ATP5G3,ATP6V0A1,PDK4,NAMPT,GALK1,ACLY,ACOT12,HMGCR,RNASEH2B,NADK2,NDUFB9,PPARA,CYC1,EHHADH,FASN,NDUFB8,TALDO1,TK1,ATP5C1,MPC2,KYNU,PMVK,VCP,GALE,PGD,SLC25A33,SULT1B1,DCK,MTHFD2L,IDH2,QPRT,CDIPT,NUDT7,NMNAT3,ACPP,ACOT11,ATP5L,FMO2,FMO1,GCK,MVK,ACACB,DCTPP1,ATP5K,COA6,ACOT4,CES1D,TRP53,GLYAT,UQCRH,MOCS1,ACNAT1,NDUFB6,ACOT1,MLYCD
1	!	0.000256	436	993	46	0.046	0.106	GO:0009259	BP	6	ribonucleotide metabolic process	8	AQP1,CS,ELOVL1,MVD,SLC25A13,CLPX,ATP5G3,ATP6V0A1,PDK4,GALK1,ACLY,ACOT12,HMGCR,RNASEH2B,NDUFB9,PPARA,CYC1,EHHADH,FASN,NDUFB8,ATP5C1,MPC2,KYNU,PMVK,VCP,GALE,SLC25A33,SULT1B1,NUDT7,ACOT11,ATP5L,GCK,MVK,ACACB,ATP5K,COA6,ACOT4,CES1D,TRP53,GLYAT,UQCRH,MOCS1,ACNAT1,NDUFB6,ACOT1,MLYCD
1	!	0.000467	445	993	46	0.046	0.103	GO:0006163	BP	6	purine nucleotide metabolic process	8	AQP1,CS,ELOVL1,MVD,SLC25A13,CLPX,ATP5G3,ATP6V0A1,PDK4,GALK1,ACLY,ACOT12,HMGCR,NDUFB9,PPARA,CYC1,EHHADH,FASN,NDUFB8,ATP5C1,MPC2,KYNU,PMVK,VCP,GALE,SLC25A33,SULT1B1,MTHFD2L,NUDT7,ACOT11,ATP5L,GCK,MVK,ACACB,ATP5K,COA6,ACOT4,CES1D,TRP53,GLYAT,UQCRH,MOCS1,ACNAT1,NDUFB6,ACOT1,MLYCD
1	!	0.000277	423	993	45	0.045	0.106	GO:0009150	BP	6	purine ribonucleotide metabolic process	9	AQP1,CS,ELOVL1,MVD,SLC25A13,CLPX,ATP5G3,ATP6V0A1,PDK4,GALK1,ACLY,ACOT12,HMGCR,NDUFB9,PPARA,CYC1,EHHADH,FASN,NDUFB8,ATP5C1,MPC2,KYNU,PMVK,VCP,GALE,SLC25A33,SULT1B1,NUDT7,ACOT11,ATP5L,GCK,MVK,ACACB,ATP5K,COA6,ACOT4,CES1D,TRP53,GLYAT,UQCRH,MOCS1,ACNAT1,NDUFB6,ACOT1,MLYCD
1	!	1.34e-07	81	993	21	0.021	0.259	GO:0006637	BP	6	acyl-CoA metabolic process	10	CS,ELOVL1,MVD,PDK4,ACLY,ACOT12,EHHADH,FASN,MPC2,KYNU,PMVK,NUDT7,ACOT11,MVK,ACACB,ACOT4,CES1D,GLYAT,ACNAT1,ACOT1,MLYCD
1	!	2.09e-06	33	993	13	0.013	0.394	GO:0006084	BP	6	acetyl-CoA metabolic process	11	CS,MVD,PDK4,ACLY,ACOT12,FASN,MPC2,KYNU,PMVK,NUDT7,MVK,ACACB,MLYCD
1	!	1.59e-10	645	993	75	0.076	0.116	GO:0017144	BP	6	drug metabolic process	3	SP1,SRR,CYP17A1,POR,CS,GCAT,CAV1,ST3GAL1,SLC25A13,CLPX,CMAH,ATP5G3,ATP6V0A1,PXDN,GALK1,ACLY,STAT5B,DHFR,NDUFB9,PPARA,CYC1,NR1I2,CBS,ALDH1A7,CPN1,NDUFB8,PAOX,ATP5C1,AGXT,NR4A2,KYNU,GATM,BMP2,AHCY,CTH,VCP,GALE,CYP4B1,SLC25A33,MTHFR,SULT1B1,DCK,MMAB,ASNS,AHCYL2,SLC27A5,IDH2,QPRT,OAT,SLC7A2,CTSH,ACPP,DNM2,ALDH1B1,ATP5L,FMO2,FMO1,GCK,ZC3H12A,ATP5K,COA6,CX3CR1,MAT2A,IDE,PTK2B,TRP53,CYP2D22,GLYAT,UQCRH,…
1	!	5.93e-09	5585	993	349	0.351	0.062	GO:0044249	BP	6	cellular biosynthetic process	3	KAT2B,SP1,SRR,DDT,IL16,SMO,NACC1,PSMC3,DAXX,HLTF,IKZF4,MCM2,LIPE,RPS11,CYP17A1,CALR,PHB2,AQP1,POR,NR1I3,RPS9,ELOVL1,MVD,CAV1,MID1IP1,CARHSP1,RPS18,BMP7,DMAP1,KDSR,WNT2,PLIN5,MED15,RPA3,RPS5,ST3GAL1,SLC25A13,ABCA1,MAPKAPK2,EXOSC10,MAFK,ATP5G3,PELP1,E2F2,ATP6V0A1,PDK4,ARG1,CRY1,AVPR1A,MKNK2,NFYB,TNIP1,BTG2,SREBF1,NAMPT,NCOA1,PSMC5,MIF4GD,GALK1,TEN1,NR1D1,ACLY,STAT5B,FOS,FDFT1,TRAF3,ID4,WRNIP1,NSD1,…
1	!	0.000149	87	993	18	0.018	0.207	GO:0044272	BP	6	sulfur compound biosynthetic process	4	SP1,ELOVL1,PDK4,ACLY,CBS,MPC2,AHCY,GCLM,CTH,MTHFR,MTHFD2L,GGT6,ACACB,MAT2A,GM5096,MPST,MLYCD,BHMT
1	!	0.0139	228	993	27	0.027	0.118	GO:0051188	BP	6	cofactor biosynthetic process	4	ELOVL1,PDK4,NAMPT,GALK1,ACLY,DHFR,NADK2,PPARA,GSTO1,MPC2,KYNU,GCLM,GALE,MMAB,IDH2,QPRT,IREB2,NMNAT3,RSAD1,GGT6,GCK,ACACB,MAT2A,TRP53,MOCS1,MTHFS,MLYCD
1	!	0.0397	175	993	22	0.022	0.126	GO:0009108	BP	6	coenzyme biosynthetic process	5	ELOVL1,PDK4,NAMPT,GALK1,ACLY,DHFR,NADK2,PPARA,GSTO1,MPC2,KYNU,GALE,IDH2,QPRT,NMNAT3,GCK,ACACB,MAT2A,TRP53,MOCS1,MTHFS,MLYCD
1	!	0.00233	4675	993	274	0.276	0.059	GO:0044271	BP	6	cellular nitrogen compound biosynthetic process	4	KAT2B,SP1,IL16,SMO,NACC1,PSMC3,DAXX,HLTF,IKZF4,LIPE,RPS11,CALR,PHB2,AQP1,NR1I3,RPS9,ELOVL1,CAV1,CARHSP1,RPS18,BMP7,DMAP1,WNT2,MED15,RPS5,SLC25A13,EXOSC10,MAFK,ATP5G3,PELP1,E2F2,ATP6V0A1,PDK4,ARG1,CRY1,MKNK2,NFYB,TNIP1,BTG2,SREBF1,NAMPT,NCOA1,PSMC5,MIF4GD,GALK1,TEN1,NR1D1,ACLY,STAT5B,FOS,TRAF3,ID4,WRNIP1,NSD1,TERT,DHFR,TSC22D1,NADK2,PPARA,L3MBTL2,SREBF2,IL1RAP,CYC1,PMM2,NR1I2,EIF4A2,APP,PARP3,FOXP…
1	!	2.28e-05	736	993	69	0.069	0.094	GO:0043604	BP	6	amide biosynthetic process	5	RPS11,CALR,RPS9,ELOVL1,RPS18,RPS5,PDK4,ARG1,MKNK2,BTG2,MIF4GD,ACLY,DHFR,EIF4A2,APP,EIF2AK2,RPS14,RPS24,PAIP1,CPEB1,IGFBP5,FARSB,MPC2,EPRS,GCLM,RPS20,SESN2,RPL22,ASNS,RBM3,AARS,IREB2,EEFSEC,RPS29,CEBPA,EIF1,RPS16,RPL10A,FAU,RPL12,RPL22L1,THBS1,GGT6,MRPS27,MVK,ACACB,ZC3H12A,NGRN,RPL9,RPS8,RPS23,RPS27RT,BCL3,NPM1,PUS7,RPL32,PTK2B,RPS7,RPS12,RPL35,MTHFS,NCK2,RPS28,SARS2,MLYCD,RPL13A,RPL39,RPS27,RPL41
1	!	0.000428	637	993	59	0.059	0.093	GO:0043043	BP	6	peptide biosynthetic process	6	RPS11,CALR,RPS9,RPS18,RPS5,MKNK2,BTG2,MIF4GD,DHFR,EIF4A2,APP,EIF2AK2,RPS14,RPS24,PAIP1,CPEB1,IGFBP5,FARSB,EPRS,GCLM,RPS20,SESN2,RPL22,RBM3,AARS,IREB2,EEFSEC,RPS29,EIF1,RPS16,RPL10A,FAU,RPL12,RPL22L1,THBS1,GGT6,MRPS27,MVK,ZC3H12A,NGRN,RPL9,RPS8,RPS23,RPS27RT,BCL3,NPM1,PUS7,RPL32,PTK2B,RPS7,RPS12,RPL35,NCK2,RPS28,SARS2,RPL13A,RPL39,RPS27,RPL41
1	!	5.27e-18	935	993	112	0.113	0.12	GO:0006082	BP	6	organic acid metabolic process	3	SCPEP1,SRR,LIPE,POR,CS,GCAT,ELOVL1,CAV1,MID1IP1,PLIN5,ST3GAL1,CMAH,PDK4,ARG1,VNN3,AVPR1A,SREBF1,GALK1,NR1D1,ACLY,STAT5B,SLC17A1,ECI2,ACOT12,DHFR,ACOX2,HACL1,PPARA,EHHADH,ACAT2,CYP39A1,PIM1,CBS,STARD4,FADS3,LIPA,GSTO1,FASN,ACADL,FARSB,AGXT,SCLY,SLC45A3,MPC2,EPRS,KYNU,HSD17B12,GATM,SLC27A2,LPIN3,AHCY,GCLM,CTH,GALE,CYP4A31,SESN2,PGD,MTHFR,UGDH,SULT1B1,MTHFD2L,PRKAB1,ASNS,AHCYL2,ABCG2,TNFRSF1A,SLC27A…
1	!	1.38e-16	920	993	108	0.109	0.117	GO:0043436	BP	6	oxoacid metabolic process	4	SCPEP1,SRR,LIPE,POR,CS,GCAT,ELOVL1,CAV1,MID1IP1,PLIN5,ST3GAL1,CMAH,PDK4,ARG1,VNN3,AVPR1A,SREBF1,GALK1,NR1D1,ACLY,STAT5B,ECI2,ACOT12,DHFR,ACOX2,HACL1,PPARA,EHHADH,ACAT2,CYP39A1,PIM1,CBS,STARD4,FADS3,LIPA,GSTO1,FASN,ACADL,FARSB,AGXT,SCLY,SLC45A3,MPC2,EPRS,KYNU,HSD17B12,GATM,SLC27A2,LPIN3,AHCY,GCLM,CTH,GALE,CYP4A31,SESN2,PGD,MTHFR,UGDH,SULT1B1,MTHFD2L,PRKAB1,ASNS,AHCYL2,ABCG2,TNFRSF1A,SLC27A5,IDH2,N…
1	!	1.45e-17	880	993	107	0.108	0.122	GO:0019752	BP	6	carboxylic acid metabolic process	5	SCPEP1,SRR,LIPE,POR,CS,GCAT,ELOVL1,CAV1,MID1IP1,PLIN5,ST3GAL1,CMAH,PDK4,ARG1,VNN3,AVPR1A,SREBF1,GALK1,NR1D1,ACLY,STAT5B,ECI2,ACOT12,DHFR,ACOX2,HACL1,PPARA,EHHADH,ACAT2,CYP39A1,PIM1,CBS,STARD4,FADS3,LIPA,GSTO1,FASN,ACADL,FARSB,AGXT,SCLY,SLC45A3,MPC2,EPRS,KYNU,HSD17B12,GATM,SLC27A2,LPIN3,AHCY,GCLM,CTH,GALE,CYP4A31,SESN2,PGD,MTHFR,UGDH,MTHFD2L,PRKAB1,ASNS,AHCYL2,ABCG2,TNFRSF1A,SLC27A5,IDH2,NOX4,QPRT…
1	!	2e-14	547	993	75	0.076	0.137	GO:0032787	BP	6	monocarboxylic acid metabolic process	6	SCPEP1,SRR,LIPE,POR,ELOVL1,CAV1,MID1IP1,PLIN5,PDK4,VNN3,AVPR1A,SREBF1,GALK1,NR1D1,ACLY,STAT5B,ECI2,ACOT12,ACOX2,HACL1,PPARA,EHHADH,ACAT2,CYP39A1,STARD4,FADS3,LIPA,FASN,ACADL,AGXT,SLC45A3,MPC2,KYNU,HSD17B12,SLC27A2,LPIN3,GALE,CYP4A31,SESN2,PGD,PRKAB1,ASNS,TNFRSF1A,SLC27A5,IDH2,APOA5,ETFA,ACOT11,UGT2A3,DECR2,AKR1D1,ATP8B1,PNPLA3,GCK,ACACB,CYP2C37,FADS6,PRKCE,INSIG1,ACOT4,CYP2C50,CES1D,TRP53,CYP2D22…
1	!	0.000845	210	993	28	0.028	0.133	GO:0016054	BP	6	organic acid catabolic process	4	LIPE,GCAT,PLIN5,ARG1,ECI2,ACOX2,HACL1,EHHADH,ACAT2,CYP39A1,CBS,ACADL,AGXT,SCLY,KYNU,SLC27A2,LPIN3,AHCY,CYP4A31,SESN2,QPRT,ETFA,AKR1D1,ACACB,ACOT4,CES1D,CYP4A32,MLYCD
1	!	0.000845	210	993	28	0.028	0.133	GO:0046395	BP	6	carboxylic acid catabolic process	5	LIPE,GCAT,PLIN5,ARG1,ECI2,ACOX2,HACL1,EHHADH,ACAT2,CYP39A1,CBS,ACADL,AGXT,SCLY,KYNU,SLC27A2,LPIN3,AHCY,CYP4A31,SESN2,QPRT,ETFA,AKR1D1,ACACB,ACOT4,CES1D,CYP4A32,MLYCD
1	!	0.000196	108	993	20	0.02	0.185	GO:0072329	BP	6	monocarboxylic acid catabolic process	6	LIPE,PLIN5,ECI2,ACOX2,HACL1,EHHADH,ACAT2,CYP39A1,ACADL,AGXT,SLC27A2,LPIN3,CYP4A31,SESN2,ETFA,AKR1D1,ACACB,CES1D,CYP4A32,MLYCD
1	!	3.6e-07	342	993	45	0.045	0.132	GO:0016053	BP	6	organic acid biosynthetic process	4	SRR,ELOVL1,MID1IP1,PDK4,AVPR1A,SREBF1,GALK1,NR1D1,ACLY,DHFR,PPARA,CYP39A1,CBS,STARD4,FADS3,GSTO1,FASN,AGXT,SLC45A3,KYNU,HSD17B12,GATM,SLC27A2,AHCY,CTH,GALE,MTHFR,UGDH,MTHFD2L,PRKAB1,ASNS,SLC27A5,OAT,APOA5,DECR2,AKR1D1,GCK,ACACB,FADS6,INSIG1,TRP53,MTHFS,GM5096,MLYCD,BHMT
1	!	2.96e-07	340	993	45	0.045	0.132	GO:0046394	BP	6	carboxylic acid biosynthetic process	5	SRR,ELOVL1,MID1IP1,PDK4,AVPR1A,SREBF1,GALK1,NR1D1,ACLY,DHFR,PPARA,CYP39A1,CBS,STARD4,FADS3,GSTO1,FASN,AGXT,SLC45A3,KYNU,HSD17B12,GATM,SLC27A2,AHCY,CTH,GALE,MTHFR,UGDH,MTHFD2L,PRKAB1,ASNS,SLC27A5,OAT,APOA5,DECR2,AKR1D1,GCK,ACACB,FADS6,INSIG1,TRP53,MTHFS,GM5096,MLYCD,BHMT
1	!	0.000281	236	993	31	0.031	0.131	GO:0072330	BP	6	monocarboxylic acid biosynthetic process	6	SRR,ELOVL1,MID1IP1,PDK4,AVPR1A,SREBF1,GALK1,NR1D1,ACLY,PPARA,CYP39A1,STARD4,FADS3,FASN,AGXT,SLC45A3,HSD17B12,SLC27A2,GALE,PRKAB1,ASNS,SLC27A5,APOA5,DECR2,AKR1D1,GCK,ACACB,FADS6,INSIG1,TRP53,MLYCD
1	!	0.0362	174	993	22	0.022	0.126	GO:0042180	BP	6	cellular ketone metabolic process	3	CYP17A1,CAV1,MID1IP1,KDSR,PLIN5,PDK4,AVPR1A,SREBF1,NR1D1,STAT5B,HMGCR,PPARA,STARD4,SLC45A3,KYNU,BMP2,APOA5,BMP6,ACACB,PRKCE,INSIG1,MLYCD
1	!	0.0447	115	993	17	0.017	0.148	GO:0010565	BP	6	regulation of cellular ketone metabolic process	4	CAV1,MID1IP1,PLIN5,PDK4,AVPR1A,SREBF1,NR1D1,PPARA,STARD4,SLC45A3,BMP2,APOA5,BMP6,ACACB,PRKCE,INSIG1,MLYCD
1	!	2.44e-11	913	993	96	0.097	0.105	GO:0044255	BP	6	cellular lipid metabolic process	3	SCPEP1,LIPE,POR,ELOVL1,MVD,CAV1,MID1IP1,RARRES2,KDSR,PLIN5,PDK4,AVPR1A,SREBF1,ACLY,STAT5B,FDFT1,GPLD1,ECI2,ACOT12,HMGCR,ACOX2,HACL1,PPARA,ST3GAL6,EHHADH,SERINC2,PIGX,SYNJ2,ACAT2,STARD4,IMPA2,FADS3,LIPA,RBP4,FASN,PI4K2A,ABHD6,PDGFA,ACADL,SLC45A3,HSD17B12,CRLS1,SLC27A2,LPIN3,PMVK,CYP4A31,SESN2,FAM126A,PRKAB1,ATG7,TNFRSF1A,SLC27A5,CDIPT,ACER3,ST3GAL4,APOA5,LDLR,ETFA,GDE1,ACOT11,DECR2,PIK3R1,SERPINA1…
1	!	3.93e-11	365	993	54	0.054	0.148	GO:0006631	BP	6	fatty acid metabolic process	4	LIPE,POR,ELOVL1,CAV1,MID1IP1,PLIN5,PDK4,AVPR1A,SREBF1,ACLY,STAT5B,ECI2,ACOT12,ACOX2,HACL1,PPARA,EHHADH,ACAT2,FADS3,LIPA,FASN,ACADL,SLC45A3,HSD17B12,SLC27A2,LPIN3,CYP4A31,SESN2,PRKAB1,TNFRSF1A,SLC27A5,APOA5,ETFA,ACOT11,DECR2,PNPLA3,ACACB,CYP2C37,FADS6,INSIG1,ACOT4,CYP2C50,CES1D,CYP2D22,CYP4A32,CYP4A12A,CYP2C54,CYP2D40,ACNAT1,ACOT1,MLYCD,CYP2C68,ACSF2,CYP2D10
1	!	0.0125	94	993	16	0.016	0.17	GO:0001676	BP	6	long-chain fatty acid metabolic process	5	LIPE,ACADL,SLC27A2,CYP4A31,SLC27A5,PNPLA3,CYP2C37,ACOT4,CYP2C50,CYP2D22,CYP4A32,CYP2C54,CYP2D40,ACOT1,CYP2C68,CYP2D10
1	!	0.00192	92	993	17	0.017	0.185	GO:0009062	BP	6	fatty acid catabolic process	5	LIPE,PLIN5,ECI2,ACOX2,HACL1,EHHADH,ACAT2,ACADL,SLC27A2,LPIN3,CYP4A31,SESN2,ETFA,ACACB,CES1D,CYP4A32,MLYCD
1	!	1.32e-05	267	993	36	0.036	0.135	GO:0044262	BP	6	cellular carbohydrate metabolic process	3	KAT2B,HSD11B1,PDK4,IGFBP3,GALK1,NR1D1,PPARA,SYNJ2,TFF3,PCDH12,IMPA2,IGFBP5,SLC45A3,SORD,ITPKA,RORC,SESN2,PGD,ABCG2,IDH2,LCMT1,TREH,SERPINA12,GCK,ACACB,PRKCE,LEPR,PTK2B,TRP53,MUP11,MLYCD,G6PC,MUP18,MUP16,MUP9,MUP12
1	!	1.86e-05	144	993	25	0.025	0.174	GO:0010675	BP	6	regulation of cellular carbohydrate metabolic process	4	KAT2B,HSD11B1,PDK4,IGFBP3,NR1D1,PPARA,TFF3,IGFBP5,SLC45A3,RORC,SESN2,LCMT1,SERPINA12,GCK,ACACB,PRKCE,LEPR,PTK2B,TRP53,MUP11,MLYCD,MUP18,MUP16,MUP9,MUP12
1	!	1.99e-05	114	993	22	0.022	0.193	GO:0010906	BP	6	regulation of glucose metabolic process	5	KAT2B,PDK4,IGFBP3,NR1D1,PPARA,TFF3,IGFBP5,SLC45A3,RORC,SESN2,LCMT1,SERPINA12,GCK,ACACB,LEPR,TRP53,MUP11,MLYCD,MUP18,MUP16,MUP9,MUP12
1	!	0.000305	165	993	25	0.025	0.152	GO:0006575	BP	6	cellular modified amino acid metabolic process	3	POR,SLC22A5,VNN3,STAT5B,DHFR,SERINC2,GSTO1,GATM,AHCY,GSTM4,GCLM,CTH,MTHFR,SULT1B1,MTHFD2L,AHCYL2,NAT8,GSTA4,GSTT2,GGT6,ETHE1,MTHFS,GM5096,GGH,BHMT
1	!	0.000173	38	993	12	0.012	0.316	GO:0000096	BP	6	sulfur amino acid metabolic process	1	CBS,AGXT,AHCY,GCLM,CTH,MTHFR,MTHFD2L,AHCYL2,NOX4,GM5096,MPST,BHMT
1	!	0.00273	14	993	7	0.007	0.5	GO:0006534	BP	6	cysteine metabolic process	2	CBS,AGXT,AHCY,GCLM,CTH,AHCYL2,MPST
1	!	0.0485	20	993	7	0.007	0.35	GO:0006555	BP	6	methionine metabolic process	2	AHCY,CTH,MTHFR,MTHFD2L,AHCYL2,GM5096,BHMT
1	!	0.0055	5662	993	320	0.322	0.057	GO:0048518	BP	6	positive regulation of biological process	1	KAT2B,LGALS9,PCNT,SP1,DDT,IL16,SMO,NACC1,PSMC3,ANGPTL4,DAXX,HLTF,IKZF4,CYP17A1,CALR,MMD,PHB2,AQP1,PRKACA,POR,NR1I3,RPS9,MVD,PPP2R1A,CAV1,MID1IP1,CLSTN3,GPRC5B,BMP7,RARRES2,DMAP1,WNT2,PLIN5,FUZ,ATRAID,ABCA1,CLPX,LONRF3,MAPKAPK2,BIK,DHX58,SGK2,SRSF1,SLC22A5,PELP1,E2F2,RSPO3,SGK1,ARG1,AVPR1A,NFYB,TNIP1,BTG2,IGFBP3,SREBF1,NAMPT,NBAS,RNF144A,NCOA1,PSMC5,PECAM1,NR1D1,STAT5B,FOS,TRAF3,GPLD1,ID4,NSD1,TER…
1	!	6.22e-05	3286	993	212	0.213	0.065	GO:0009893	BP	6	positive regulation of metabolic process	2	KAT2B,LGALS9,SP1,DDT,SMO,PSMC3,ANGPTL4,DAXX,HLTF,IKZF4,CYP17A1,CALR,MMD,PHB2,POR,NR1I3,RPS9,CAV1,MID1IP1,GPRC5B,BMP7,RARRES2,WNT2,PLIN5,FUZ,CLPX,LONRF3,MAPKAPK2,SRSF1,PELP1,E2F2,AVPR1A,NFYB,TNIP1,BTG2,IGFBP3,SREBF1,NAMPT,NBAS,RNF144A,NCOA1,PSMC5,PECAM1,NR1D1,STAT5B,FOS,GPLD1,ID4,NSD1,TERT,HMGCR,DHFR,PLAU,TSC22D1,BNIP3L,PPARA,L3MBTL2,TAB1,MYH9,SREBF2,NR1I2,APP,PARP3,EIF2AK2,NELFE,STARD4,LTB,RELA,T…
1	!	0.0311	1861	993	123	0.124	0.066	GO:0009891	BP	6	positive regulation of biosynthetic process	3	KAT2B,SP1,SMO,PSMC3,DAXX,HLTF,IKZF4,CYP17A1,POR,NR1I3,RPS9,MID1IP1,BMP7,WNT2,PLIN5,MAPKAPK2,PELP1,E2F2,AVPR1A,NFYB,TNIP1,SREBF1,NAMPT,NCOA1,PSMC5,NR1D1,STAT5B,FOS,ID4,NSD1,TERT,TSC22D1,PPARA,SREBF2,NR1I2,APP,NELFE,STARD4,LTB,RELA,ABHD6,PAIP1,PAOX,SIRT3,RPTOR,CPEB1,JADE1,SLC40A1,XRCC5,SLC45A3,DCAF6,ATF3,FAM129B,NR4A2,MED19,SP3,TRIM44,BMP2,ZC3H8,LPIN3,ZBTB7B,RORC,VCP,SESN2,CLOCK,TFEC,RASL11A,CNBP,E…
1	!	0.00526	3075	993	191	0.192	0.062	GO:0010604	BP	6	positive regulation of macromolecule metabolic process	3	KAT2B,LGALS9,SP1,DDT,SMO,PSMC3,DAXX,HLTF,IKZF4,CALR,MMD,PHB2,NR1I3,RPS9,CAV1,GPRC5B,BMP7,RARRES2,WNT2,FUZ,CLPX,LONRF3,MAPKAPK2,SRSF1,PELP1,E2F2,NFYB,TNIP1,BTG2,IGFBP3,SREBF1,NAMPT,NBAS,RNF144A,NCOA1,PSMC5,PECAM1,NR1D1,STAT5B,FOS,GPLD1,ID4,NSD1,TERT,HMGCR,TSC22D1,PPARA,L3MBTL2,TAB1,MYH9,SREBF2,NR1I2,APP,PARP3,EIF2AK2,NELFE,LTB,RELA,NAB2,PAIP1,SIRT3,RPTOR,CPEB1,JADE1,PARD3,PDGFA,SLC40A1,RHBDD1,XRCC…
1	!	0.00061	148	993	23	0.023	0.155	GO:0062013	BP	6	positive regulation of small molecule metabolic process	3	KAT2B,POR,MID1IP1,PLIN5,AVPR1A,SREBF1,NR1D1,PPARA,STARD4,SLC45A3,VCP,APOA5,FGF1,BMP6,GCK,PRKCE,FDPS,MUP11,MLYCD,MUP18,MUP16,MUP9,MUP12
1	!	5.01e-06	156	993	27	0.027	0.173	GO:0045834	BP	6	positive regulation of lipid metabolic process	3	ANGPTL4,CYP17A1,POR,MID1IP1,PLIN5,AVPR1A,SREBF1,NR1D1,PPARA,STARD4,ABHD6,SLC45A3,APOA5,LDLR,FGF1,BMP6,ADORA1,PRKCE,FGFR3,PTK2B,FDPS,MUP11,MLYCD,MUP18,MUP16,MUP9,MUP12
1	!	0.0306	33	993	9	0.009	0.273	GO:0045940	BP	6	positive regulation of steroid metabolic process	4	CYP17A1,POR,SREBF1,NR1D1,STARD4,APOA5,FGF1,BMP6,FDPS
1	!	0.0271	5102	993	288	0.29	0.056	GO:0048522	BP	6	positive regulation of cellular process	1	KAT2B,LGALS9,SP1,DDT,SMO,NACC1,PSMC3,DAXX,HLTF,IKZF4,CYP17A1,CALR,MMD,PHB2,AQP1,PRKACA,POR,NR1I3,RPS9,MVD,PPP2R1A,CAV1,MID1IP1,CLSTN3,GPRC5B,BMP7,RARRES2,WNT2,PLIN5,FUZ,ATRAID,CLPX,LONRF3,MAPKAPK2,BIK,DHX58,SRSF1,PELP1,E2F2,RSPO3,SGK1,ARG1,AVPR1A,NFYB,TNIP1,BTG2,IGFBP3,SREBF1,NAMPT,RNF144A,NCOA1,PSMC5,PECAM1,NR1D1,STAT5B,FOS,GPLD1,ID4,NSD1,TERT,HMGCR,ACOX2,PLAU,RNASEH2B,TSC22D1,BNIP3L,PPARA,L3MBT…
1	!	0.0373	1610	993	109	0.11	0.068	GO:0010647	BP	6	positive regulation of cell communication	1	LGALS9,DDT,SMO,CALR,PHB2,POR,PPP2R1A,CAV1,CLSTN3,GPRC5B,BMP7,WNT2,BIK,DHX58,RSPO3,IGFBP3,PECAM1,TERT,HMGCR,TAB1,APP,EIF2AK2,NELFE,RELA,RBP4,TRIM8,GSTO1,PTPRJ,BAIAP2,SIRT3,RPTOR,PDGFA,IGFBP5,MPC2,ATF3,TRIM44,BMP2,ZBP1,PDGFC,ZBTB7B,NTRK1,CTH,VCP,EXOC4,ZC3HAV1,ATG7,LTBR,TNFRSF1A,NOX4,KCTD13,STX4A,FAM53B,FGFR1,SMARCA4,CTSH,RYK,ACPP,PPP1R9A,ROR1,PRR5,GADD45A,TBC1D24,FGF1,APOPT1,TGM2,LEFTY1,BMP6,MMD2,C…
1	!	0.0216	18	993	7	0.007	0.389	GO:0000097	BP	6	sulfur amino acid biosynthetic process	1	CBS,AHCY,CTH,MTHFR,MTHFD2L,GM5096,BHMT
1	!	0.0256	25	993	8	0.008	0.32	GO:0009404	BP	6	toxin metabolic process	1	SP1,CBS,GSTO1,CTH,FMO2,FMO1,ETHE1,MPST
1	!	0.003	6	993	5	0.005	0.833	GO:0070813	BP	6	hydrogen sulfide metabolic process	2	SP1,CBS,CTH,ETHE1,MPST
1	!	0.00223	4814	993	281	0.283	0.058	GO:0044267	BP	6	cellular protein metabolic process	1	SCPEP1,KAT2B,LGALS9,STK38L,DDT,PSMC3,DAXX,HLTF,FKBP11,RPS11,CALR,MMD,PHB2,AQP1,PRKACA,POR,RPS9,PPP2R1A,CAV1,RPS18,GPRC5B,BMP7,RARRES2,DMAP1,FUZ,RPS5,ATRAID,ST3GAL1,DNAJB9,ABCA1,CLPX,LONRF3,MAPKAPK2,TTLL12,SGK2,PDK4,UBXN6,SGK1,CRY1,MKNK2,CABIN1,TNIP1,BTG2,IGFBP3,SREBF1,RNF144A,NCOA1,PSMC5,PECAM1,MIF4GD,NR1D1,GPLD1,NSD1,TERT,HMGCR,DHFR,BNIP3L,DCAF11,L3MBTL2,TAB1,MYH9,PMM2,ST3GAL6,EHHADH,HRG,EIF4A2,…
1	!	0.000446	3062	993	196	0.197	0.064	GO:0031325	BP	6	positive regulation of cellular metabolic process	1	KAT2B,LGALS9,SP1,DDT,SMO,PSMC3,DAXX,HLTF,IKZF4,CYP17A1,MMD,PHB2,POR,NR1I3,RPS9,CAV1,MID1IP1,GPRC5B,BMP7,RARRES2,WNT2,PLIN5,FUZ,CLPX,LONRF3,MAPKAPK2,SRSF1,PELP1,E2F2,AVPR1A,NFYB,TNIP1,BTG2,IGFBP3,SREBF1,NAMPT,RNF144A,NCOA1,PSMC5,PECAM1,NR1D1,STAT5B,FOS,GPLD1,ID4,NSD1,TERT,HMGCR,PLAU,TSC22D1,BNIP3L,PPARA,L3MBTL2,TAB1,MYH9,SREBF2,NR1I2,APP,PARP3,EIF2AK2,NELFE,STARD4,LTB,RELA,TRIM8,NAB2,PAIP1,PAOX,SI…
1	!	0.0281	1820	993	121	0.122	0.066	GO:0031328	BP	6	positive regulation of cellular biosynthetic process	2	KAT2B,SP1,SMO,PSMC3,DAXX,HLTF,IKZF4,CYP17A1,POR,NR1I3,RPS9,MID1IP1,BMP7,WNT2,PLIN5,MAPKAPK2,PELP1,E2F2,AVPR1A,NFYB,TNIP1,SREBF1,NAMPT,NCOA1,PSMC5,NR1D1,STAT5B,FOS,ID4,NSD1,TERT,TSC22D1,PPARA,SREBF2,NR1I2,APP,NELFE,STARD4,LTB,RELA,PAIP1,PAOX,SIRT3,RPTOR,CPEB1,JADE1,SLC40A1,XRCC5,SLC45A3,DCAF6,ATF3,FAM129B,NR4A2,MED19,SP3,TRIM44,BMP2,ZC3H8,LPIN3,ZBTB7B,RORC,VCP,SESN2,CLOCK,TFEC,RASL11A,CNBP,ETV6,TN…
1	!	0.016	1835	993	123	0.124	0.067	GO:0010628	BP	6	positive regulation of gene expression	1	KAT2B,LGALS9,SP1,SMO,PSMC3,HLTF,IKZF4,CALR,NR1I3,RPS9,CAV1,BMP7,WNT2,FUZ,MAPKAPK2,SRSF1,PELP1,E2F2,NFYB,TNIP1,SREBF1,NAMPT,NBAS,NCOA1,PSMC5,NR1D1,STAT5B,FOS,ID4,NSD1,TERT,TSC22D1,PPARA,MYH9,SREBF2,NR1I2,APP,NELFE,RELA,PAIP1,SIRT3,RPTOR,CPEB1,SLC40A1,RHBDD1,DCAF6,ATF3,FAM129B,NR4A2,MED19,SP3,TRIM44,BMP2,ZC3H8,LPIN3,ZFP64,ADAR,ZBTB7B,LMNA,RORC,SESN2,CLOCK,PRKAB1,TFEC,RASL11A,NAT8,CNBP,ETV6,TNFRSF1A…
1	!	0.0115	4	993	4	0.004	1	GO:0070814	BP	6	hydrogen sulfide biosynthetic process	1	SP1,CBS,CTH,MPST
1	!	0.0162	2703	993	169	0.17	0.063	GO:0051246	BP	6	regulation of protein metabolic process	1	KAT2B,LGALS9,DDT,PSMC3,DAXX,CALR,MMD,PHB2,AQP1,PRKACA,POR,RPS9,PPP2R1A,CAV1,GPRC5B,BMP7,RARRES2,FUZ,ATRAID,CLPX,LONRF3,MAPKAPK2,CRY1,MKNK2,CABIN1,TNIP1,BTG2,IGFBP3,SREBF1,RNF144A,PSMC5,PECAM1,MIF4GD,STAT5B,TRAF3,GPLD1,NSD1,TERT,HMGCR,DHFR,L3MBTL2,TAB1,MYH9,HRG,APP,RCAN1,CBS,EIF2AK2,NELFE,LTB,RPS14,RELA,PTPRJ,NAB2,PAIP1,SIRT3,RPTOR,CPEB1,PARD3,PDGFA,MAP4K4,RHBDD1,IGFBP5,XRCC5,CD55,APCS,EPRS,ATF3,N…
1	!	1.02e-05	161	993	27	0.027	0.168	GO:0046890	BP	6	regulation of lipid biosynthetic process	1	CYP17A1,POR,MID1IP1,PLIN5,PDK4,AVPR1A,SREBF1,NR1D1,STARD4,ABHD6,PDGFA,SLC45A3,BMP2,ATG7,APOA5,LDLR,FGF1,BMP6,SERPINA12,INSIG1,DHCR7,FDPS,MUP11,MUP18,MUP16,MUP9,MUP12
1	!	0.00711	80	993	15	0.015	0.188	GO:0046889	BP	6	positive regulation of lipid biosynthetic process	2	CYP17A1,POR,MID1IP1,PLIN5,AVPR1A,SREBF1,NR1D1,STARD4,ABHD6,SLC45A3,APOA5,LDLR,FGF1,BMP6,FDPS
1	!	0.0256	25	993	8	0.008	0.32	GO:0010893	BP	6	positive regulation of steroid biosynthetic process	3	CYP17A1,POR,SREBF1,NR1D1,STARD4,FGF1,BMP6,FDPS
1	!	0.0109	2532	993	161	0.162	0.064	GO:0032268	BP	6	regulation of cellular protein metabolic process	1	KAT2B,LGALS9,DDT,PSMC3,DAXX,CALR,MMD,PHB2,AQP1,PRKACA,POR,RPS9,PPP2R1A,CAV1,GPRC5B,BMP7,RARRES2,FUZ,ATRAID,CLPX,LONRF3,CRY1,MKNK2,CABIN1,TNIP1,BTG2,IGFBP3,SREBF1,RNF144A,PSMC5,PECAM1,MIF4GD,GPLD1,NSD1,TERT,HMGCR,DHFR,L3MBTL2,TAB1,MYH9,HRG,APP,RCAN1,CBS,EIF2AK2,NELFE,RPS14,RELA,PTPRJ,NAB2,PAIP1,SIRT3,RPTOR,CPEB1,PARD3,PDGFA,MAP4K4,RHBDD1,IGFBP5,XRCC5,CD55,EPRS,ATF3,NEK6,PSMD14,NMI,TRIM44,BMP2,ADAR…
1	!	0.000844	619	993	57	0.057	0.092	GO:0006412	BP	6	translation	1	RPS11,CALR,RPS9,RPS18,RPS5,MKNK2,BTG2,MIF4GD,DHFR,EIF4A2,APP,EIF2AK2,RPS14,RPS24,PAIP1,CPEB1,IGFBP5,FARSB,EPRS,RPS20,SESN2,RPL22,RBM3,AARS,IREB2,EEFSEC,RPS29,EIF1,RPS16,RPL10A,FAU,RPL12,RPL22L1,THBS1,MRPS27,MVK,ZC3H12A,NGRN,RPL9,RPS8,RPS23,RPS27RT,BCL3,NPM1,PUS7,RPL32,PTK2B,RPS7,RPS12,RPL35,NCK2,RPS28,SARS2,RPL13A,RPL39,RPS27,RPL41
1	!	0.0181	86	993	15	0.015	0.174	GO:0002181	BP	6	cytoplasmic translation	2	CPEB1,RPS20,RPL22,AARS,RPS29,RPL10A,RPL22L1,RPL9,RPS23,RPL32,RPS7,RPS28,RPL13A,RPL39,RPL41
1	!	0.00909	53	993	12	0.012	0.226	GO:0006111	BP	6	regulation of gluconeogenesis	1	KAT2B,NR1D1,PPARA,SESN2,SERPINA12,GCK,LEPR,MUP11,MUP18,MUP16,MUP9,MUP12
1	!	0.0126	23	993	8	0.008	0.348	GO:0045721	BP	6	negative regulation of gluconeogenesis	2	SERPINA12,GCK,LEPR,MUP11,MUP18,MUP16,MUP9,MUP12
1	!	0.00177	123	993	20	0.02	0.163	GO:0055088	BP	24	lipid homeostasis	1	ANGPTL4,CAV1,ABCA1,NR1D1,SREBF2,GPIHBP1,ABCA2,SESN2,ATG7,APOA5,LDLR,CEBPA,MYLIP,ASGR2,GCK,ADORA1,ABCB4,PCSK9,INSIG1,G6PC
1	!	0.00937	1669	993	115	0.116	0.069	GO:0065003	BP	21	protein-containing complex assembly	1	SRR,NACC1,PSMC3,ANGPTL4,DAXX,IKZF4,MCM2,CALR,LETM1,FBLIM1,PPP2R1A,CAV1,MID1IP1,MLKL,ABCA1,BIK,SRSF1,ATP6V0A1,SGK1,ARG1,MICU1,CABIN1,HSPA4,PSMC5,PECAM1,HMGCR,HACL1,CHRNA2,C9,NDUFB9,CLDN1,HRG,APP,EIF2AK2,RPS14,CUTC,NDUFB8,BAIAP2,TK1,ACADL,FARSB,AHCTF1,APCS,TOR1B,TOR1A,ADAR,PDGFC,CTH,VCP,SLC25A33,PRKAB1,TMCC1,TNFRSF1A,PSMC4,QPRT,KCTD13,LCMT1,PARVA,STX4A,DNHD1,ANKS4B,OAT,VBP1,BIRC3,APOA5,SMARCA4,ACPP…
1	!	0.00377	306	993	34	0.034	0.111	GO:0048511	BP	9	rhythmic process	1	KAT2B,SP1,CRY1,SREBF1,NAMPT,NCOA1,NR1D1,STAT5B,ID4,PPARA,AHCY,SCHIP1,NTRK1,RORC,CLOCK,ALB,BHLHE41,ETS1,CIART,ARNTL2,ADORA1,MAT2A,ARNTL,NTRK2,NFIL3,LEPR,TRP53,DBP,JUND,MUP11,MUP18,MUP16,MUP9,MUP12
1	!	0.000845	210	993	28	0.028	0.133	GO:0007623	BP	9	circadian rhythm	2	CRY1,SREBF1,NAMPT,NR1D1,ID4,PPARA,AHCY,NTRK1,RORC,CLOCK,ALB,BHLHE41,CIART,ARNTL2,ADORA1,MAT2A,ARNTL,NTRK2,NFIL3,LEPR,TRP53,DBP,JUND,MUP11,MUP18,MUP16,MUP9,MUP12
1	!	8.16e-21	11903	993	691	0.696	0.058	GO:0043226	CC	13	organelle	1	NARF,HDDC2,KAT2B,VPREB3,SNAPIN,S100A6,LGALS9,PCNT,SP1,KPNB1,CYP51,ERGIC1,STK38L,GRAMD3,IL16,SMO,NACC1,PSMC3,DAXX,HLTF,IKZF4,MCM2,LIPE,RABAC1,RPS11,SLC25A1,CYP17A1,CALR,MMD,PHB2,AQP1,MYO9B,NDRG1,SPC25,LETM1,PRKACA,POR,TOMM40L,NR1I3,CS,TBCB,FBLIM1,RPS9,GCAT,ELOVL1,MVD,SLC5A6,PPP2R1A,FANCE,CAV1,MID1IP1,CLSTN3,CARHSP1,RPS18,GPRC5B,BMP7,DMAP1,OIT3,KDSR,SLC3A2,IFI35,RDM1,PLIN5,FUZ,MED15,RPA3,RPS5,TANGO…
1	!	2.36e-17	10644	993	624	0.628	0.059	GO:0043227	CC	13	membrane-bounded organelle	2	NARF,HDDC2,KAT2B,VPREB3,SNAPIN,S100A6,LGALS9,SP1,KPNB1,CYP51,ERGIC1,IL16,SMO,NACC1,PSMC3,DAXX,HLTF,IKZF4,MCM2,LIPE,RABAC1,SLC25A1,CYP17A1,CALR,MMD,PHB2,AQP1,NDRG1,SPC25,LETM1,PRKACA,POR,TOMM40L,NR1I3,CS,FBLIM1,RPS9,GCAT,ELOVL1,MVD,SLC5A6,FANCE,CAV1,MID1IP1,CLSTN3,RPS18,GPRC5B,BMP7,DMAP1,OIT3,KDSR,SLC3A2,IFI35,RDM1,PLIN5,MED15,RPA3,TANGO2,ATRAID,ST3GAL1,DNAJB9,CLIC3,SLC25A13,ABCA1,CLPX,STEAP2,HSD1…
1	!	0.0477	4140	993	239	0.241	0.058	GO:0031974	CC	13	membrane-enclosed lumen	1	NARF,KAT2B,SP1,KPNB1,ERGIC1,IL16,NACC1,PSMC3,DAXX,HLTF,IKZF4,MCM2,CALR,PHB2,PRKACA,NR1I3,CS,FBLIM1,RPS9,GCAT,MVD,FANCE,GPRC5B,DMAP1,RDM1,MED15,RPA3,DNAJB9,CLIC3,CLPX,MAPKAPK2,NUP50,EXOSC10,SGK2,MAFK,SRSF1,PELP1,ATP6V0A1,PDK4,SGK1,CRY1,MICU1,MKNK2,CABIN1,NFYB,TNIP1,IGFBP3,SREBF1,NAMPT,NCOA1,PSMC5,MIF4GD,TEN1,NR1D1,ACLY,STAT5B,FOS,WRNIP1,ECI2,TERT,XRCC4,RNASEH2B,BNIP3L,MBNL2,DCAF11,PPARA,RANGAP1,TA…
1	!	2.32e-11	17095	993	866	0.872	0.051	GO:0005623	CC	13	cell	1	NARF,SCPEP1,HDDC2,TOM1L2,KAT2B,VPREB3,SNAPIN,S100A6,LGALS9,PCNT,SP1,SRR,KPNB1,CYP51,ERGIC1,STK38L,DDT,GRAMD3,IL16,SMO,CAPNS1,NACC1,ESAM,PSMC3,DAXX,HLTF,IKZF4,NUDT14,MCM2,LIPE,FKBP11,RABAC1,RPS11,INMT,SLC25A1,CYP17A1,CALR,MMD,PHB2,AQP1,MYO9B,NDRG1,SPC25,LETM1,PRKACA,POR,TOMM40L,NR1I3,CS,TBCB,FBLIM1,RPS9,SUSD2,GCAT,ELOVL1,MVD,SLC5A6,PPP2R1A,FANCE,CAV1,MID1IP1,CLSTN3,CARHSP1,RPS18,GPRC5B,DMAP1,OIT3,…
1	!	3.39e-11	17056	993	864	0.87	0.051	GO:0044464	CC	13	cell part	2	NARF,SCPEP1,HDDC2,TOM1L2,KAT2B,VPREB3,SNAPIN,S100A6,LGALS9,PCNT,SP1,SRR,KPNB1,CYP51,ERGIC1,STK38L,DDT,GRAMD3,IL16,SMO,CAPNS1,NACC1,ESAM,PSMC3,DAXX,HLTF,IKZF4,NUDT14,MCM2,LIPE,FKBP11,RABAC1,RPS11,INMT,SLC25A1,CYP17A1,CALR,MMD,PHB2,AQP1,MYO9B,NDRG1,SPC25,LETM1,PRKACA,POR,TOMM40L,NR1I3,CS,TBCB,FBLIM1,RPS9,SUSD2,GCAT,ELOVL1,MVD,SLC5A6,PPP2R1A,FANCE,CAV1,MID1IP1,CLSTN3,CARHSP1,RPS18,GPRC5B,DMAP1,OIT3,…
1	!	2.47e-06	1116	993	96	0.097	0.086	GO:0031975	CC	13	envelope	3	S100A6,KPNB1,SLC25A1,CALR,PHB2,AQP1,LETM1,TOMM40L,GCAT,OIT3,ATRAID,SLC25A13,CLPX,HSD11B1,NUP50,BIK,ATP5G3,SLC25A22,PDK4,RTN4IP1,ARG1,MICU1,SLC25A29,2010107E04RIK,SLC25A48,BNIP3L,NDUFB9,RANGAP1,CYC1,APP,SYNJ2,SLC25A45,GSTO1,NDUFB8,SIRT3,ATP5C1,ACADL,MFF,AHCTF1,MPC2,TOR1B,TOR1A,GATM,SORD,CRLS1,LMNA,ABCB8,SLC25A33,MTHFD2L,IDH2,SLC25A15,CYB5B,REXO2,SH3BGRL2,PARP16,SLC25A20,DNM2,DDX19B,COX18,SIGMAR1,P…
1	!	4.7e-30	13871	993	798	0.804	0.058	GO:0005622	CC	13	intracellular	3	NARF,SCPEP1,HDDC2,TOM1L2,KAT2B,VPREB3,SNAPIN,S100A6,LGALS9,PCNT,SP1,SRR,KPNB1,CYP51,ERGIC1,STK38L,DDT,GRAMD3,IL16,SMO,CAPNS1,NACC1,PSMC3,DAXX,HLTF,IKZF4,NUDT14,MCM2,LIPE,FKBP11,RABAC1,RPS11,INMT,SLC25A1,CYP17A1,CALR,MMD,PHB2,AQP1,MYO9B,NDRG1,SPC25,LETM1,PRKACA,POR,TOMM40L,NR1I3,CS,TBCB,FBLIM1,RPS9,GCAT,ELOVL1,MVD,PPP2R1A,FANCE,CAV1,MID1IP1,CLSTN3,CARHSP1,RPS18,GPRC5B,DMAP1,OIT3,KDSR,SLC3A2,IFI35,…
1	!	3.99e-34	13275	993	785	0.791	0.059	GO:0044424	CC	13	intracellular part	4	NARF,SCPEP1,HDDC2,KAT2B,VPREB3,SNAPIN,S100A6,LGALS9,PCNT,SP1,SRR,KPNB1,CYP51,ERGIC1,STK38L,DDT,GRAMD3,IL16,SMO,CAPNS1,NACC1,PSMC3,DAXX,HLTF,IKZF4,NUDT14,MCM2,LIPE,FKBP11,RABAC1,RPS11,INMT,SLC25A1,CYP17A1,CALR,MMD,PHB2,AQP1,MYO9B,NDRG1,SPC25,LETM1,PRKACA,POR,TOMM40L,NR1I3,CS,TBCB,FBLIM1,RPS9,GCAT,ELOVL1,MVD,PPP2R1A,FANCE,CAV1,MID1IP1,CLSTN3,CARHSP1,RPS18,GPRC5B,DMAP1,OIT3,KDSR,SLC3A2,IFI35,RDM1,WN…
1	!	6.77e-41	10422	993	684	0.689	0.066	GO:0005737	CC	13	cytoplasm	5	SCPEP1,HDDC2,KAT2B,VPREB3,SNAPIN,S100A6,LGALS9,PCNT,SP1,SRR,KPNB1,CYP51,ERGIC1,STK38L,DDT,GRAMD3,IL16,SMO,CAPNS1,NACC1,PSMC3,HLTF,NUDT14,MCM2,LIPE,FKBP11,RABAC1,RPS11,INMT,SLC25A1,CYP17A1,CALR,MMD,PHB2,AQP1,MYO9B,NDRG1,SPC25,LETM1,PRKACA,POR,TOMM40L,NR1I3,CS,TBCB,FBLIM1,RPS9,GCAT,ELOVL1,MVD,PPP2R1A,CAV1,MID1IP1,CLSTN3,CARHSP1,RPS18,GPRC5B,DMAP1,KDSR,SLC3A2,RDM1,WNT2,PLIN5,FUZ,MED15,MLKL,RPS5,TANG…
1	!	1e-32	8155	993	559	0.563	0.069	GO:0044444	CC	13	cytoplasmic part	6	SCPEP1,HDDC2,KAT2B,VPREB3,SNAPIN,S100A6,LGALS9,PCNT,KPNB1,CYP51,ERGIC1,STK38L,GRAMD3,IL16,SMO,CAPNS1,PSMC3,LIPE,RABAC1,RPS11,INMT,SLC25A1,CYP17A1,CALR,MMD,PHB2,AQP1,MYO9B,NDRG1,SPC25,LETM1,PRKACA,POR,TOMM40L,NR1I3,CS,TBCB,FBLIM1,RPS9,GCAT,ELOVL1,MVD,PPP2R1A,CAV1,MID1IP1,CLSTN3,CARHSP1,RPS18,GPRC5B,DMAP1,KDSR,SLC3A2,RDM1,PLIN5,RPS5,TANGO2,ATRAID,ST3GAL1,DNAJB9,SLC25A13,ABCA1,CLPX,STEAP2,GATSL2,HSD…
1	!	8.9e-18	3440	993	269	0.271	0.078	GO:0005829	CC	13	cytosol	7	SCPEP1,KAT2B,SNAPIN,S100A6,LGALS9,PCNT,KPNB1,STK38L,IL16,CAPNS1,PSMC3,LIPE,RPS11,INMT,CALR,MYO9B,NDRG1,SPC25,PRKACA,NR1I3,TBCB,RPS9,MVD,PPP2R1A,CAV1,MID1IP1,CARHSP1,RPS18,GPRC5B,DMAP1,SLC3A2,RDM1,PLIN5,RPS5,CLPX,STEAP2,GATSL2,CYTH1,EXOSC10,VPS53,ATP6V0A1,UBXN6,SGK1,CRY1,CABIN1,HSPA4,TNIP1,NAMPT,NCOA1,PSMC5,MIF4GD,ACLY,STAT5B,FOS,TERT,XRCC4,ACOT12,DHFR,ACOX2,BNIP3L,C9,RANGAP1,TAB1,MYH9,PLEC,CEP97,…
1	!	1.5e-05	256	993	35	0.035	0.137	GO:0044445	CC	13	cytosolic part	8	SNAPIN,PSMC3,RPS11,RPS9,RPS18,RPS5,PSMC5,RPS14,PI4K2A,HPS1,RPS24,PSMD14,RPS20,CASP9,RPL22,PSMC4,RPS29,RPS16,RPL10A,FAU,RPL12,RPL22L1,RPL9,RPS8,RPS23,RPS27RT,IDE,RPL32,RPS7,RPL35,RPS28,RPL13A,RPL39,RPS27,RPL41
1	!	3.12e-21	11660	993	682	0.687	0.058	GO:0043229	CC	13	intracellular organelle	5	NARF,HDDC2,KAT2B,VPREB3,SNAPIN,S100A6,LGALS9,PCNT,SP1,KPNB1,CYP51,ERGIC1,STK38L,GRAMD3,IL16,SMO,NACC1,PSMC3,DAXX,HLTF,IKZF4,MCM2,LIPE,RABAC1,RPS11,SLC25A1,CYP17A1,CALR,MMD,PHB2,AQP1,MYO9B,NDRG1,SPC25,LETM1,PRKACA,POR,TOMM40L,NR1I3,CS,TBCB,FBLIM1,RPS9,GCAT,ELOVL1,MVD,PPP2R1A,FANCE,CAV1,MID1IP1,CLSTN3,CARHSP1,RPS18,GPRC5B,DMAP1,OIT3,KDSR,SLC3A2,IFI35,RDM1,PLIN5,FUZ,MED15,RPA3,RPS5,TANGO2,ATRAID,ST3…
1	!	4.15e-18	9957	993	596	0.6	0.06	GO:0043231	CC	13	intracellular membrane-bounded organelle	6	NARF,HDDC2,KAT2B,VPREB3,SNAPIN,S100A6,LGALS9,SP1,KPNB1,CYP51,ERGIC1,IL16,SMO,NACC1,PSMC3,DAXX,HLTF,IKZF4,MCM2,LIPE,RABAC1,SLC25A1,CYP17A1,CALR,MMD,PHB2,AQP1,NDRG1,SPC25,LETM1,PRKACA,POR,TOMM40L,NR1I3,CS,FBLIM1,RPS9,GCAT,ELOVL1,MVD,FANCE,CAV1,MID1IP1,CLSTN3,RPS18,GPRC5B,DMAP1,OIT3,KDSR,SLC3A2,IFI35,RDM1,PLIN5,MED15,RPA3,TANGO2,ATRAID,ST3GAL1,DNAJB9,CLIC3,SLC25A13,ABCA1,CLPX,STEAP2,HSD11B1,MAPKAPK2…
1	!	8.46e-05	144	993	24	0.024	0.167	GO:0042579	CC	13	microbody	7	MVD,CAV1,ECI2,HMGCR,ACOX2,HACL1,EHHADH,PAOX,MFF,AGXT,PEX16,SLC27A2,PMVK,IDH2,NUDT7,DECR2,MVK,LACC1,8430408G22RIK,ACOT4,IDE,FDPS,ACNAT1,MLYCD
1	!	8.46e-05	144	993	24	0.024	0.167	GO:0005777	CC	13	peroxisome	8	MVD,CAV1,ECI2,HMGCR,ACOX2,HACL1,EHHADH,PAOX,MFF,AGXT,PEX16,SLC27A2,PMVK,IDH2,NUDT7,DECR2,MVK,LACC1,8430408G22RIK,ACOT4,IDE,FDPS,ACNAT1,MLYCD
1	!	6.18e-09	1754	993	143	0.144	0.082	GO:0005739	CC	13	mitochondrion	7	HDDC2,LIPE,SLC25A1,CYP17A1,PHB2,LETM1,PRKACA,POR,TOMM40L,CS,GCAT,CAV1,PLIN5,SLC25A13,CLPX,BIK,ATP5G3,SLC25A22,PDK4,RTN4IP1,SGK1,ARG1,CRY1,MICU1,1810043G02RIK,ACLY,SLC25A29,2010107E04RIK,ECI2,SLC25A48,TERT,DHFR,BNIP3L,NADK2,NDUFB9,SREBF2,CYC1,EHHADH,SYNJ2,ACAT2,RPS14,SLC25A45,CAPN1,FASN,PI4K2A,NDUFB8,ABHD6,SIRT3,ATP5C1,ACADL,RHBDD1,MFF,AGXT,MPC2,KYNU,DYNC1I2,GATM,SORD,CRLS1,SLC27A2,SESN2,CASP9,ABC…
1	!	0.00735	416	993	41	0.041	0.099	GO:0045177	CC	13	apical part of cell	3	SRR,AQP1,CAV1,SLC3A2,HSD11B1,SLC22A5,SLC17A1,OCLN,CLDN1,PLEC,GPIHBP1,APP,SLC10A2,SLC23A1,ACY3,CD55,ABCB11,LRP2,ATP6V0D2,MPDZ,CYP4A31,ABCB1B,ABCG2,NOX4,AQP8,STX4A,LDLR,ACPP,ANK2,GNAT1,REEP6,CLIC4,IGFBP2,MREG,ATP8B1,SLC7A5,ABCB1A,ABCB4,CYP4A32,FAT1,HSPA1A
1	!	0.000524	3746	993	231	0.233	0.062	GO:0012505	CC	13	endomembrane system	3	VPREB3,SNAPIN,S100A6,KPNB1,CYP51,ERGIC1,SMO,RABAC1,CYP17A1,CALR,MMD,AQP1,NDRG1,PRKACA,POR,ELOVL1,CAV1,CLSTN3,OIT3,KDSR,TANGO2,ATRAID,ST3GAL1,DNAJB9,ABCA1,STEAP2,HSD11B1,NUP50,CMAH,BIK,VPS53,ATP6V0A1,UBXN6,CYB561,SGK1,SLC36A1,IGFBP3,SREBF1,NBAS,ARSG,RNF144A,PXDN,FOS,FDFT1,TRAF3,SSR1,GKAP1,HMGCR,AP3M1,BNIP3L,SQLE,RANGAP1,SREBF2,ARSA,ST3GAL6,APP,PIGX,CYP39A1,TFF3,FADS3,GSTO1,FASN,PI4K2A,CPN1,NDUFB8,…
1	!	1.36e-06	1599	993	126	0.127	0.079	GO:0005783	CC	13	endoplasmic reticulum	4	VPREB3,KPNB1,CYP51,ERGIC1,CYP17A1,CALR,POR,ELOVL1,CAV1,CLSTN3,KDSR,DNAJB9,HSD11B1,CMAH,SGK1,SLC36A1,SREBF1,NBAS,ARSG,PXDN,FOS,FDFT1,SSR1,HMGCR,BNIP3L,SQLE,SREBF2,ARSA,APP,PIGX,CYP39A1,FADS3,NDUFB8,BAIAP2,RHBDD1,HSD17B7,TOR1B,TOR1A,LRP2,HSD17B12,PEX16,SLC27A2,CYP2U1,VCP,GPX7,CYP4B1,TMEM50A,EXTL1,CLOCK,FAM69A,ALB,AHCYL2,NAT8,CNBP,TMCC1,CIDEC,SLC27A5,NOX4,CDIPT,ACER3,ANKS4B,PDILT,NSDHL,RNF128,ATP11A…
1	!	3.6e-11	8171	993	485	0.488	0.059	GO:0044422	CC	13	organelle part	1	NARF,KAT2B,SNAPIN,S100A6,PCNT,SP1,KPNB1,CYP51,ERGIC1,GRAMD3,IL16,SMO,NACC1,PSMC3,DAXX,HLTF,IKZF4,MCM2,RPS11,SLC25A1,CALR,MMD,PHB2,AQP1,MYO9B,NDRG1,SPC25,LETM1,PRKACA,POR,TOMM40L,NR1I3,CS,TBCB,FBLIM1,RPS9,GCAT,ELOVL1,MVD,SLC5A6,PPP2R1A,FANCE,CAV1,MID1IP1,CLSTN3,RPS18,GPRC5B,DMAP1,OIT3,KDSR,RDM1,MED15,RPA3,RPS5,ATRAID,ST3GAL1,DNAJB9,CLIC3,SLC25A13,CLPX,STEAP2,HSD11B1,MAPKAPK2,NUP50,BIK,EXOSC10,VPS5…
1	!	0.0477	4140	993	239	0.241	0.058	GO:0043233	CC	13	organelle lumen	2	NARF,KAT2B,SP1,KPNB1,ERGIC1,IL16,NACC1,PSMC3,DAXX,HLTF,IKZF4,MCM2,CALR,PHB2,PRKACA,NR1I3,CS,FBLIM1,RPS9,GCAT,MVD,FANCE,GPRC5B,DMAP1,RDM1,MED15,RPA3,DNAJB9,CLIC3,CLPX,MAPKAPK2,NUP50,EXOSC10,SGK2,MAFK,SRSF1,PELP1,ATP6V0A1,PDK4,SGK1,CRY1,MICU1,MKNK2,CABIN1,NFYB,TNIP1,IGFBP3,SREBF1,NAMPT,NCOA1,PSMC5,MIF4GD,TEN1,NR1D1,ACLY,STAT5B,FOS,WRNIP1,ECI2,TERT,XRCC4,RNASEH2B,BNIP3L,MBNL2,DCAF11,PPARA,RANGAP1,TA…
1	!	0.0438	4135	993	239	0.241	0.058	GO:0070013	CC	13	intracellular organelle lumen	3	NARF,KAT2B,SP1,KPNB1,ERGIC1,IL16,NACC1,PSMC3,DAXX,HLTF,IKZF4,MCM2,CALR,PHB2,PRKACA,NR1I3,CS,FBLIM1,RPS9,GCAT,MVD,FANCE,GPRC5B,DMAP1,RDM1,MED15,RPA3,DNAJB9,CLIC3,CLPX,MAPKAPK2,NUP50,EXOSC10,SGK2,MAFK,SRSF1,PELP1,ATP6V0A1,PDK4,SGK1,CRY1,MICU1,MKNK2,CABIN1,NFYB,TNIP1,IGFBP3,SREBF1,NAMPT,NCOA1,PSMC5,MIF4GD,TEN1,NR1D1,ACLY,STAT5B,FOS,WRNIP1,ECI2,TERT,XRCC4,RNASEH2B,BNIP3L,MBNL2,DCAF11,PPARA,RANGAP1,TA…
1	!	5.85e-11	7938	993	473	0.476	0.06	GO:0044446	CC	13	intracellular organelle part	2	NARF,KAT2B,SNAPIN,S100A6,PCNT,SP1,KPNB1,CYP51,ERGIC1,GRAMD3,IL16,SMO,NACC1,PSMC3,DAXX,HLTF,IKZF4,MCM2,RPS11,SLC25A1,CALR,MMD,PHB2,AQP1,MYO9B,NDRG1,SPC25,LETM1,PRKACA,POR,TOMM40L,NR1I3,CS,TBCB,FBLIM1,RPS9,GCAT,ELOVL1,MVD,PPP2R1A,FANCE,CAV1,MID1IP1,CLSTN3,RPS18,GPRC5B,DMAP1,OIT3,KDSR,RDM1,MED15,RPA3,RPS5,ATRAID,ST3GAL1,DNAJB9,CLIC3,SLC25A13,CLPX,STEAP2,HSD11B1,MAPKAPK2,NUP50,BIK,EXOSC10,VPS53,SGK2,…
1	!	0.00239	1427	993	104	0.105	0.073	GO:0031984	CC	13	organelle subcompartment	3	SNAPIN,KPNB1,CYP51,ERGIC1,CALR,POR,ELOVL1,CAV1,CLSTN3,KDSR,ST3GAL1,STEAP2,HSD11B1,VPS53,SGK1,SREBF1,FDFT1,SSR1,HMGCR,SQLE,SREBF2,ST3GAL6,PIGX,CYP39A1,FADS3,PI4K2A,RHBDD1,COPA,TOR1A,ABCB11,HSD17B12,PEX16,SLC27A2,ATP9A,CYP2U1,VCP,ST3GAL3,CYP4B1,EXTL1,ABCB1B,FAM69A,CUX1,NAT8,TMCC1,TNFRSF1A,SLC27A5,NOX4,RAB30,CDIPT,ACER3,STX4A,ANKS4B,NSDHL,MSMO1,SC5D,ST3GAL4,BACE1,PARP16,ACPP,LSS,DNM2,FNDC3A,TMEM5,RP…
1	!	0.000745	1001	993	81	0.082	0.081	GO:0044432	CC	13	endoplasmic reticulum part	3	KPNB1,CYP51,ERGIC1,CALR,POR,ELOVL1,CAV1,CLSTN3,KDSR,DNAJB9,HSD11B1,SGK1,SREBF1,NBAS,FDFT1,SSR1,HMGCR,SQLE,SREBF2,PIGX,CYP39A1,FADS3,RHBDD1,TOR1B,TOR1A,HSD17B12,PEX16,SLC27A2,CYP2U1,VCP,CYP4B1,EXTL1,FAM69A,NAT8,TMCC1,SLC27A5,NOX4,CDIPT,ACER3,ANKS4B,NSDHL,MSMO1,SC5D,PARP16,COLGALT2,LSS,RPS29,REEP6,TMTC2,SIGMAR1,PNPLA7,TAP1,TAPBPL,FMO2,FMO1,ASGR2,PIK3R1,CYP2C37,ZC3H12A,SLC35G1,PCSK9,INSIG1,IRGM1,AGM…
1	!	0.0106	884	993	70	0.07	0.079	GO:0098827	CC	13	endoplasmic reticulum subcompartment	4	KPNB1,CYP51,ERGIC1,CALR,POR,ELOVL1,CAV1,CLSTN3,KDSR,HSD11B1,SGK1,SREBF1,FDFT1,SSR1,HMGCR,SQLE,SREBF2,PIGX,CYP39A1,FADS3,RHBDD1,TOR1A,HSD17B12,PEX16,SLC27A2,CYP2U1,VCP,CYP4B1,EXTL1,FAM69A,NAT8,TMCC1,SLC27A5,NOX4,CDIPT,ACER3,ANKS4B,NSDHL,MSMO1,SC5D,PARP16,LSS,RPS29,REEP6,TMTC2,SIGMAR1,PNPLA7,TAP1,TAPBPL,FMO2,FMO1,CYP2C37,ZC3H12A,SLC35G1,INSIG1,IRGM1,AGMO,TOR1AIP2,CYP2C50,CYP3A11,RETSAT,DHCR7,CYP4A1…
1	!	1.4e-05	913	993	81	0.082	0.089	GO:0044429	CC	13	mitochondrial part	3	SLC25A1,PHB2,LETM1,TOMM40L,CS,GCAT,SLC25A13,CLPX,BIK,ATP5G3,SLC25A22,PDK4,RTN4IP1,ARG1,MICU1,SLC25A29,2010107E04RIK,SLC25A48,TERT,BNIP3L,NDUFB9,CYC1,SYNJ2,SLC25A45,NDUFB8,SIRT3,ATP5C1,ACADL,MFF,AGXT,MPC2,GATM,SORD,CRLS1,ABCB8,SLC25A33,MTHFD2L,IDH2,OAT,SLC25A15,CYB5B,REXO2,ETFA,SLC25A20,DNM2,COX18,ALDH1B1,PNPLA7,TXNIP,UQCRFS1,ATP5L,TIMM8B,NDUFB10,MRPS27,ABCA8A,CHCHD7,IKBKE,SHC1,NGRN,TIMM8A1,SLC25A…
1	!	2.36e-06	1115	993	96	0.097	0.086	GO:0031967	CC	13	organelle envelope	3	S100A6,KPNB1,SLC25A1,CALR,PHB2,AQP1,LETM1,TOMM40L,GCAT,OIT3,ATRAID,SLC25A13,CLPX,HSD11B1,NUP50,BIK,ATP5G3,SLC25A22,PDK4,RTN4IP1,ARG1,MICU1,SLC25A29,2010107E04RIK,SLC25A48,BNIP3L,NDUFB9,RANGAP1,CYC1,APP,SYNJ2,SLC25A45,GSTO1,NDUFB8,SIRT3,ATP5C1,ACADL,MFF,AHCTF1,MPC2,TOR1B,TOR1A,GATM,SORD,CRLS1,LMNA,ABCB8,SLC25A33,MTHFD2L,IDH2,SLC25A15,CYB5B,REXO2,SH3BGRL2,PARP16,SLC25A20,DNM2,DDX19B,COX18,SIGMAR1,P…
1	!	4.55e-06	678	993	67	0.067	0.099	GO:0005740	CC	13	mitochondrial envelope	4	SLC25A1,PHB2,LETM1,TOMM40L,GCAT,SLC25A13,CLPX,BIK,ATP5G3,SLC25A22,PDK4,RTN4IP1,ARG1,MICU1,SLC25A29,2010107E04RIK,SLC25A48,BNIP3L,NDUFB9,CYC1,SYNJ2,SLC25A45,NDUFB8,SIRT3,ATP5C1,ACADL,MFF,MPC2,GATM,SORD,CRLS1,ABCB8,SLC25A33,MTHFD2L,IDH2,SLC25A15,CYB5B,REXO2,SLC25A20,DNM2,COX18,PNPLA7,TXNIP,UQCRFS1,ATP5L,TIMM8B,NDUFB10,ABCA8A,CHCHD7,IKBKE,NGRN,TIMM8A1,SLC25A47,2410015M20RIK,SLC25A44,ATP5K,COA6,CFL1,…
1	!	1.05e-07	2364	993	174	0.175	0.074	GO:0031090	CC	13	organelle membrane	2	SNAPIN,KPNB1,CYP51,ERGIC1,SMO,SLC25A1,MMD,PHB2,AQP1,NDRG1,LETM1,TOMM40L,GCAT,SLC5A6,CAV1,CLSTN3,ATRAID,ST3GAL1,SLC25A13,CLPX,STEAP2,HSD11B1,NUP50,BIK,VPS53,ATP5G3,SLC25A22,ATP6V0A1,PDK4,UBXN6,CYB561,RTN4IP1,ARG1,MICU1,SLC36A1,SREBF1,RNF144A,SLC25A29,2010107E04RIK,SLC25A48,HMGCR,AP3M1,BNIP3L,SQLE,NDUFB9,RANGAP1,SREBF2,CYC1,ST3GAL6,SYNJ2,CYP39A1,SLC25A45,GSTO1,PI4K2A,NDUFB8,SIRT3,ATP5C1,ACADL,MFF,T…
1	!	0.00031	482	993	49	0.049	0.102	GO:0019866	CC	13	organelle inner membrane	3	SLC25A1,PHB2,LETM1,GCAT,SLC25A13,CLPX,ATP5G3,SLC25A22,PDK4,MICU1,SLC25A29,2010107E04RIK,SLC25A48,NDUFB9,CYC1,SLC25A45,NDUFB8,SIRT3,ATP5C1,MPC2,GATM,CRLS1,ABCB8,SLC25A33,MTHFD2L,IDH2,SLC25A15,CYB5B,SLC25A20,COX18,SIGMAR1,UQCRFS1,ATP5L,TIMM8B,NDUFB10,ABCA8A,DPY19L3,TIMM8A1,SLC25A47,2410015M20RIK,SLC25A44,ATP5K,IMMP2L,UQCRH,IFI27,NDUFB6,USMG5,MPST,COX7A1
1	!	8.4e-06	629	993	63	0.063	0.1	GO:0031966	CC	13	mitochondrial membrane	3	SLC25A1,PHB2,LETM1,TOMM40L,GCAT,SLC25A13,CLPX,BIK,ATP5G3,SLC25A22,PDK4,RTN4IP1,ARG1,MICU1,SLC25A29,2010107E04RIK,SLC25A48,BNIP3L,NDUFB9,CYC1,SYNJ2,SLC25A45,NDUFB8,SIRT3,ATP5C1,ACADL,MFF,MPC2,GATM,SORD,CRLS1,ABCB8,SLC25A33,MTHFD2L,IDH2,SLC25A15,CYB5B,SLC25A20,DNM2,COX18,PNPLA7,UQCRFS1,ATP5L,TIMM8B,NDUFB10,ABCA8A,IKBKE,NGRN,TIMM8A1,SLC25A47,2410015M20RIK,SLC25A44,ATP5K,CFL1,IMMP2L,UQCRH,MT-ND6,NDUF…
1	!	0.000128	426	993	46	0.046	0.108	GO:0005743	CC	13	mitochondrial inner membrane	4	SLC25A1,PHB2,LETM1,GCAT,SLC25A13,CLPX,ATP5G3,SLC25A22,PDK4,MICU1,SLC25A29,2010107E04RIK,SLC25A48,NDUFB9,CYC1,SLC25A45,NDUFB8,SIRT3,ATP5C1,MPC2,GATM,CRLS1,ABCB8,SLC25A33,MTHFD2L,IDH2,SLC25A15,CYB5B,SLC25A20,COX18,UQCRFS1,ATP5L,TIMM8B,NDUFB10,ABCA8A,TIMM8A1,SLC25A47,2410015M20RIK,SLC25A44,ATP5K,IMMP2L,UQCRH,NDUFB6,USMG5,MPST,COX7A1
1	!	0.0103	900	993	71	0.072	0.079	GO:0042175	CC	13	nuclear outer membrane-endoplasmic reticulum membrane network	1	CYP51,ERGIC1,CALR,POR,ELOVL1,CAV1,CLSTN3,KDSR,HSD11B1,SGK1,SREBF1,FDFT1,SSR1,HMGCR,SQLE,SREBF2,PIGX,CYP39A1,FADS3,RHBDD1,TOR1A,HSD17B12,PEX16,SLC27A2,CYP2U1,VCP,CYP4B1,EXTL1,FAM69A,NAT8,TMCC1,SLC27A5,NOX4,CDIPT,ACER3,ANKS4B,NSDHL,MSMO1,SC5D,PARP16,LSS,RPS29,REEP6,TMTC2,SIGMAR1,PNPLA7,TAP1,TAPBPL,FMO2,FMO1,PIK3R1,CYP2C37,ZC3H12A,SLC35G1,INSIG1,IRGM1,AGMO,TOR1AIP2,CYP2C50,CYP3A11,RETSAT,DHCR7,CYP4A…
1	!	0.0295	336	993	34	0.034	0.101	GO:0016324	CC	13	apical plasma membrane	1	AQP1,CAV1,SLC3A2,SLC22A5,SLC17A1,OCLN,CLDN1,PLEC,GPIHBP1,SLC10A2,SLC23A1,ACY3,CD55,ABCB11,LRP2,ATP6V0D2,MPDZ,CYP4A31,ABCB1B,ABCG2,NOX4,AQP8,STX4A,ANK2,GNAT1,IGFBP2,MREG,ATP8B1,SLC7A5,ABCB1A,ABCB4,CYP4A32,FAT1,HSPA1A
1	!	0.0019	257	993	31	0.031	0.121	GO:0005840	CC	13	ribosome	1	RPS11,RPS9,RPS18,RPS5,RPS14,RPS24,RPS20,RPL22,PRMT3,RBM3,RPS29,RPS16,RPL10A,FAU,RPL12,RPL22L1,MRPS27,RPL9,RPS8,RPS23,RPS27RT,NPM1,RPL32,RPS7,RPS12,RPL35,RPS28,RPL13A,RPL39,RPS27,RPL41
1	!	0.000176	207	993	29	0.029	0.14	GO:0044391	CC	13	ribosomal subunit	2	RPS11,RPS9,RPS18,RPS5,RPS14,RPS24,RPS20,RPL22,RBM3,RPS29,RPS16,RPL10A,FAU,RPL12,RPL22L1,MRPS27,RPL9,RPS8,RPS23,RPS27RT,NPM1,RPL32,RPS7,RPL35,RPS28,RPL13A,RPL39,RPS27,RPL41
1	!	1.94e-05	77	993	18	0.018	0.234	GO:0015935	CC	13	small ribosomal subunit	3	RPS11,RPS9,RPS18,RPS5,RPS14,RPS24,RPS20,RPS29,RPS16,FAU,MRPS27,RPS8,RPS23,RPS27RT,NPM1,RPS7,RPS28,RPS27
1	!	1.83e-07	126	993	26	0.026	0.206	GO:0022626	CC	13	cytosolic ribosome	2	RPS11,RPS9,RPS18,RPS5,RPS14,RPS24,RPS20,RPL22,RPS29,RPS16,RPL10A,FAU,RPL12,RPL22L1,RPL9,RPS8,RPS23,RPS27RT,RPL32,RPS7,RPL35,RPS28,RPL13A,RPL39,RPS27,RPL41
1	!	1.41e-07	45	993	16	0.016	0.356	GO:0022627	CC	13	cytosolic small ribosomal subunit	3	RPS11,RPS9,RPS18,RPS5,RPS14,RPS24,RPS20,RPS29,RPS16,FAU,RPS8,RPS23,RPS27RT,RPS7,RPS28,RPS27
1	!	0.0154	877	993	69	0.069	0.079	GO:0005789	CC	13	endoplasmic reticulum membrane	1	CYP51,ERGIC1,CALR,POR,ELOVL1,CAV1,CLSTN3,KDSR,HSD11B1,SGK1,SREBF1,FDFT1,SSR1,HMGCR,SQLE,SREBF2,PIGX,CYP39A1,FADS3,RHBDD1,TOR1A,HSD17B12,PEX16,SLC27A2,CYP2U1,VCP,CYP4B1,EXTL1,FAM69A,NAT8,TMCC1,SLC27A5,NOX4,CDIPT,ACER3,ANKS4B,NSDHL,MSMO1,SC5D,PARP16,LSS,RPS29,REEP6,TMTC2,SIGMAR1,PNPLA7,TAP1,TAPBPL,FMO2,FMO1,CYP2C37,ZC3H12A,SLC35G1,INSIG1,IRGM1,AGMO,TOR1AIP2,CYP2C50,CYP3A11,RETSAT,DHCR7,CYP4A12A,RDH…
1	!	0.0278	1400	993	98	0.099	0.07	GO:0046983	MF	10	protein dimerization activity	1	S100A6,SP1,SRR,DAXX,IKZF4,MVD,PPP2R1A,CAV1,BIK,E2F2,MICU1,NFYB,SREBF1,NAMPT,NCOA1,PECAM1,STAT5B,FOS,ID4,TERT,HMGCR,ACOX2,BNIP3L,NADK2,PPARA,MYH9,SREBF2,TYMP,FOXP4,CBS,SPATA24,IMPA2,RELA,RBP4,TRIM8,FASN,HPS1,PDGFA,MFF,AGXT,SCLY,EPRS,ATF3,NR4A2,KYNU,BMP2,SCHIP1,GSTM4,S100A11,PDGFC,ZBTB7B,NTRK1,GCLM,MYCL,GALE,CLOCK,DCK,RILPL1,TFEC,ASNS,ABCG2,TMCC1,BHLHE41,ATG7,QPRT,LHPP,FGFR1,ACPP,PPP1R9A,CEBPA,GADD…
1	!	4.05e-05	1814	993	133	0.134	0.073	GO:0042802	MF	12	identical protein binding	1	S100A6,SP1,SRR,GRAMD3,PSMC3,ANGPTL4,IKZF4,NUDT14,RABAC1,AQP1,MVD,CAV1,MID1IP1,PLIN5,MLKL,SLC25A13,GATSL2,CEP57L1,MICU1,TNIP1,NAMPT,PECAM1,WRNIP1,GKAP1,TERT,XRCC4,HMGCR,ACOX2,HACL1,BNIP3L,NADK2,MTSS1,MYH9,CLDN1,TYMP,APP,RCAN1,FOXP4,CBS,EIF2AK2,SPATA24,IMPA2,ACY3,RELA,TRIM8,FASN,PTPRJ,BAIAP2,NAB2,TK1,PARD3,PDGFA,SLC40A1,MFF,AGXT,SCLY,APCS,EPRS,ATF3,KYNU,NMI,SORD,BMP2,ZBP1,AHCY,SCHIP1,GSTM4,S100A11,…
1	!	1.61e-05	1174	993	97	0.098	0.083	GO:0005215	MF	4	transporter activity	1	S100A6,KPNB1,SLC25A1,AQP1,LETM1,ATP4A,TOMM40L,SLC5A6,SLC3A2,SLC41A1,CLIC3,SLC25A13,ABCA1,STEAP2,ATP5G3,SLC22A5,SLC25A22,ATP6V0A1,SLC16A7,SLC1A4,SLC36A1,SLC25A29,SLC17A1,SLC25A48,CHRNA2,GPIHBP1,SLC10A2,SERINC2,SLC23A1,STARD4,SLC25A45,RBP4,ATP5C1,SLC40A1,SLC45A3,MPC2,ABCA2,ABCB11,SLC27A2,SLC20A1,ATP9A,TMEM144,ASIC5,ATP6V0D2,ABCB1B,ABCB8,SLC25A33,SLC35F6,ABCG2,SLC13A4,SLCO1A4,SLC27A5,AQP8,ATP11A,RAS…
1	!	0.00133	1032	993	82	0.083	0.079	GO:0022857	MF	4	transmembrane transporter activity	2	S100A6,SLC25A1,AQP1,LETM1,ATP4A,TOMM40L,SLC5A6,SLC3A2,SLC41A1,CLIC3,SLC25A13,ABCA1,ATP5G3,SLC22A5,SLC25A22,ATP6V0A1,SLC16A7,SLC1A4,SLC36A1,SLC25A29,SLC17A1,SLC25A48,CHRNA2,GPIHBP1,SLC10A2,SERINC2,SLC23A1,SLC25A45,RBP4,ATP5C1,SLC40A1,SLC45A3,MPC2,ABCA2,ABCB11,SLC27A2,SLC20A1,TMEM144,ASIC5,ATP6V0D2,ABCB1B,ABCB8,SLC25A33,SLC35F6,ABCG2,SLCO1A4,SLC27A5,AQP8,RASA3,SLC25A15,SLC7A2,SLCO2A1,SLC25A20,CALHM…
1	!	0.00329	360	993	38	0.038	0.106	GO:0022804	MF	4	active transmembrane transporter activity	3	LETM1,ATP4A,SLC5A6,SLC41A1,ABCA1,ATP5G3,SLC22A5,SLC25A22,ATP6V0A1,SLC16A7,SLC1A4,SLC36A1,SLC17A1,SLC10A2,SLC23A1,ATP5C1,SLC45A3,ABCA2,ABCB11,SLC20A1,ATP6V0D2,ABCB1B,ABCB8,ABCG2,SLCO1A4,SLCO2A1,SLC25A20,SLC17A2,TAP1,ATP5L,SLC7A5,ABCB1A,ABCA8A,ABCB4,SLC15A5,SLC22A26,GM6614,SLC6A16
1	!	0.00176	134	993	21	0.021	0.157	GO:0005342	MF	4	organic acid transmembrane transporter activity	3	SLC25A1,SLC3A2,SLC25A13,SLC25A22,SLC16A7,SLC1A4,SLC36A1,SLC25A29,SLC10A2,SERINC2,SLC23A1,MPC2,ABCB11,SLC27A2,SLCO1A4,SLC27A5,SLC25A15,SLC7A2,SLCO2A1,SLC38A7,SLC7A5
1	!	0.0115	83	993	15	0.015	0.181	GO:0015238	MF	4	drug transmembrane transporter activity	3	SLC25A1,AQP1,SLC25A13,SLC22A5,SLC25A22,SLC1A4,SLC36A1,SLC25A29,ABCB11,ABCB1B,ABCG2,SLC25A15,SLC7A2,SLC38A7,ABCB1A
1	!	0.00694	207	993	26	0.026	0.126	GO:0008514	MF	4	organic anion transmembrane transporter activity	1	SLC25A1,SLC3A2,SLC25A13,SLC22A5,SLC25A22,SLC16A7,SLC1A4,SLC36A1,SLC25A29,SLC10A2,SERINC2,SLC23A1,MPC2,ABCB11,SLC27A2,SLCO1A4,SLC27A5,SLC25A15,SLC7A2,SLCO2A1,SLC22A15,SLC38A7,ATP8B1,SLC7A5,SLC22A26,GM6614
1	!	0.00155	133	993	21	0.021	0.158	GO:0046943	MF	4	carboxylic acid transmembrane transporter activity	2	SLC25A1,SLC3A2,SLC25A13,SLC25A22,SLC16A7,SLC1A4,SLC36A1,SLC25A29,SLC10A2,SERINC2,SLC23A1,MPC2,ABCB11,SLC27A2,SLCO1A4,SLC27A5,SLC25A15,SLC7A2,SLCO2A1,SLC38A7,SLC7A5
1	!	5.64e-05	1039	993	87	0.088	0.084	GO:0046914	MF	17	transition metal ion binding	1	S100A6,CYP51,HLTF,IKZF4,CYP17A1,CALR,PRKACA,NR1I3,DHX58,RTN4IP1,ARG1,NR1D1,TRAF3,NSD1,PPARA,L3MBTL2,NR1I2,HRG,APP,CYP39A1,PIM1,QPCT,TRIM8,CUTC,CPN1,SIRT3,TK1,EPRS,PTER,NR4A2,TRIM44,SORD,CAR1,CAR3,AHCY,CYP2U1,RORC,CYP4A31,CYP4B1,ALB,CNBP,CYP2B10,ZFAND6,CDIPT,CAR5B,MSMO1,NUDT7,SC5D,RECQL4,RPS29,GALT,POLR2L,CAR14,POLR3K,AGBL3,DDX58,TRIM7,CAR8,CYP2C37,S100A13,LACC1,FBXO40,TIMM8A1,AGMO,PRKCA,COA6,TCHH…
1	!	0.000133	181	993	27	0.027	0.149	GO:0003735	MF	11	structural constituent of ribosome	1	RPS11,RPS9,RPS18,RPS5,RPS14,RPS24,RPS20,RPL22,RPS29,RPS16,RPL10A,FAU,RPL12,RPL22L1,RPL9,RPS8,RPS23,RPS27RT,RPL32,RPS7,RPS12,RPL35,RPS28,RPL13A,RPL39,RPS27,RPL41
1	!	0.0421	637	993	53	0.053	0.083	GO:0008134	MF	25	transcription factor binding	1	KAT2B,SP1,PSMC3,DAXX,IKZF4,CALR,DMAP1,MAFK,PELP1,E2F2,CRY1,NFYB,NCOA1,PSMC5,NR1D1,STAT5B,FOS,ID4,NSD1,TERT,PPARA,PIM1,RELA,BAIAP2,NAB2,RPTOR,NEK6,NR4A2,LRP2,MED19,RORC,CLOCK,ACTB,BHLHE41,ATG7,PSMC4,BBS2,WWP2,SMARCA4,TRIB1,CEBPA,CITED2,PIK3R1,JUNB,BCL3,ARNTL,NPM1,TRP53,IFI27,HES6,JUND,HSPA1A,NUP62
1	!	0.00392	13657	993	687	0.692	0.05	GO:0005488	MF	3	binding	1	NARF,TOM1L2,KAT2B,SNAPIN,S100A6,LGALS9,PCNT,SP1,SRR,KPNB1,CYP51,STK38L,DDT,GRAMD3,IL16,SMO,CAPNS1,NACC1,PSMC3,ANGPTL4,DAXX,HLTF,IKZF4,NUDT14,MCM2,LIPE,FKBP11,RABAC1,RPS11,CYP17A1,CALR,PHB2,AQP1,MYO9B,NDRG1,LETM1,PRKACA,POR,ATP4A,TOMM40L,NR1I3,PRG4,TBCB,FBLIM1,RPS9,SUSD2,GCAT,MVD,PPP2R1A,CAV1,MID1IP1,CLSTN3,CARHSP1,RPS18,GPRC5B,BMP7,RARRES2,DMAP1,OIT3,SLC3A2,RDM1,WNT2,PLIN5,RPA3,MLKL,RPS5,DNAJB9,S…
1	!	5.99e-09	2584	993	191	0.192	0.074	GO:0036094	MF	3	small molecule binding	2	SRR,STK38L,PSMC3,HLTF,MCM2,MYO9B,PRKACA,POR,ATP4A,GCAT,MVD,MLKL,ABCA1,CLPX,HSD11B1,MAPKAPK2,TTLL12,EXOSC10,DHX58,SGK2,SLC22A5,PDK4,SGK1,CRY1,MKNK2,HSPA4,PSMC5,GALK1,ACLY,WRNIP1,ECI2,ACOT12,HMGCR,DHFR,ACOX2,HACL1,NADK2,SQLE,MYH9,EIF4A2,PIM1,CBS,EIF2AK2,STARD4,RBP4,FASN,PI4K2A,AATK,SIRT3,TALDO1,TK1,ARL10,ACADL,MAP4K4,XRCC5,TUBA4A,FARSB,AGXT,SCLY,EPRS,MRC1,NEK6,PKN3,TOR1B,TOR1A,KYNU,ABCA2,ABCB11,UBE…
1	!	2.24e-09	570	993	67	0.067	0.118	GO:0048037	MF	3	cofactor binding	2	SRR,CYP51,CYP17A1,POR,GCAT,HSD11B1,CMAH,SGK1,PXDN,NR1D1,ACLY,ECI2,HMGCR,DHFR,ACOX2,HACL1,SQLE,CYC1,HRG,CYP39A1,CBS,FASN,SIRT3,ACADL,AGXT,KYNU,SORD,AHCY,GSTM4,CYP2U1,CTH,CYP4A31,CYP4B1,PGD,MTHFR,UGDH,ALB,MMAB,ASNS,CYP2B10,IDH2,OAT,DUS2,CYB5B,IREB2,ETFA,GSTA4,UQCRFS1,RSAD1,FMO2,FMO1,PNPLA3,ACACB,CYP2C37,CYP2C50,CYP3A11,DHCR7,CYP2D22,CYP4A32,MOCS1,AOX3,CYP4A12A,CYP2C54,CYP2D40,CYP2C68,CYP4A12B,CYP2D…
1	!	0.00499	296	993	33	0.033	0.111	GO:0050662	MF	3	coenzyme binding	3	SRR,POR,GCAT,HSD11B1,ECI2,HMGCR,DHFR,ACOX2,HACL1,SQLE,CBS,FASN,SIRT3,ACADL,AGXT,KYNU,SORD,AHCY,CTH,PGD,MTHFR,UGDH,ALB,IDH2,OAT,DUS2,ETFA,FMO2,FMO1,PNPLA3,ACACB,DHCR7,AOX3
1	!	0.00397	5828	993	329	0.331	0.056	GO:0097159	MF	3	organic cyclic compound binding	2	KAT2B,SP1,SRR,CYP51,STK38L,PSMC3,HLTF,IKZF4,MCM2,LIPE,FKBP11,RPS11,CYP17A1,CALR,MYO9B,PRKACA,POR,ATP4A,NR1I3,RPS9,GCAT,MVD,CARHSP1,RPS18,SLC3A2,RDM1,RPA3,MLKL,RPS5,ABCA1,CLPX,HSD11B1,MAPKAPK2,TTLL12,EXOSC10,DHX58,SGK2,MAFK,SRSF1,SLC22A5,E2F2,PDK4,SGK1,CRY1,MKNK2,NFYB,HSPA4,SREBF1,NCOA1,PXDN,PSMC5,MIF4GD,GALK1,TEN1,NR1D1,ACLY,STAT5B,DCAF4,FOS,WRNIP1,ECI2,NSD1,TERT,XRCC4,ACOT12,HMGCR,DHFR,ACOX2,HAC…
1	!	0.0017	5737	993	327	0.329	0.057	GO:1901363	MF	3	heterocyclic compound binding	2	KAT2B,SP1,SRR,CYP51,STK38L,PSMC3,HLTF,IKZF4,MCM2,LIPE,FKBP11,RPS11,CYP17A1,CALR,MYO9B,PRKACA,POR,ATP4A,NR1I3,RPS9,GCAT,MVD,CARHSP1,RPS18,SLC3A2,RDM1,RPA3,MLKL,RPS5,ABCA1,CLPX,HSD11B1,MAPKAPK2,TTLL12,EXOSC10,DHX58,SGK2,MAFK,SRSF1,SLC22A5,E2F2,PDK4,SGK1,CRY1,MKNK2,NFYB,HSPA4,SREBF1,NCOA1,PXDN,PSMC5,MIF4GD,GALK1,TEN1,NR1D1,ACLY,STAT5B,DCAF4,FOS,WRNIP1,ECI2,NSD1,TERT,XRCC4,ACOT12,HMGCR,DHFR,ACOX2,HAC…
1	!	1.53e-05	2194	993	156	0.157	0.071	GO:1901265	MF	3	nucleoside phosphate binding	3	SRR,STK38L,PSMC3,HLTF,MCM2,MYO9B,PRKACA,POR,ATP4A,MVD,MLKL,ABCA1,CLPX,HSD11B1,MAPKAPK2,TTLL12,EXOSC10,DHX58,SGK2,SLC22A5,PDK4,SGK1,CRY1,MKNK2,HSPA4,PSMC5,GALK1,ACLY,WRNIP1,ECI2,ACOT12,HMGCR,DHFR,ACOX2,NADK2,SQLE,MYH9,EIF4A2,PIM1,EIF2AK2,FASN,PI4K2A,AATK,SIRT3,TK1,ARL10,ACADL,MAP4K4,XRCC5,TUBA4A,FARSB,EPRS,NEK6,PKN3,TOR1B,TOR1A,ABCA2,ABCB11,UBE2L6,SORD,ITPKA,SLC27A2,ATP9A,AHCY,PMVK,NTRK1,EPHA7,VCP…
1	!	1.53e-05	2194	993	156	0.157	0.071	GO:0000166	MF	3	nucleotide binding	4	SRR,STK38L,PSMC3,HLTF,MCM2,MYO9B,PRKACA,POR,ATP4A,MVD,MLKL,ABCA1,CLPX,HSD11B1,MAPKAPK2,TTLL12,EXOSC10,DHX58,SGK2,SLC22A5,PDK4,SGK1,CRY1,MKNK2,HSPA4,PSMC5,GALK1,ACLY,WRNIP1,ECI2,ACOT12,HMGCR,DHFR,ACOX2,NADK2,SQLE,MYH9,EIF4A2,PIM1,EIF2AK2,FASN,PI4K2A,AATK,SIRT3,TK1,ARL10,ACADL,MAP4K4,XRCC5,TUBA4A,FARSB,EPRS,NEK6,PKN3,TOR1B,TOR1A,ABCA2,ABCB11,UBE2L6,SORD,ITPKA,SLC27A2,ATP9A,AHCY,PMVK,NTRK1,EPHA7,VCP…
1	!	0.00156	1951	993	134	0.135	0.069	GO:0017076	MF	3	purine nucleotide binding	5	SRR,STK38L,PSMC3,HLTF,MCM2,MYO9B,PRKACA,ATP4A,MVD,MLKL,ABCA1,CLPX,MAPKAPK2,TTLL12,DHX58,SGK2,SLC22A5,PDK4,SGK1,MKNK2,HSPA4,PSMC5,GALK1,ACLY,WRNIP1,ECI2,ACOT12,NADK2,MYH9,EIF4A2,PIM1,EIF2AK2,PI4K2A,AATK,TK1,ARL10,ACADL,MAP4K4,XRCC5,TUBA4A,FARSB,EPRS,NEK6,PKN3,TOR1B,TOR1A,ABCA2,ABCB11,UBE2L6,ITPKA,SLC27A2,ATP9A,AHCY,PMVK,NTRK1,EPHA7,VCP,PDE4B,PSMC2,ABCB1B,ABCB8,DCK,MMAB,ACTB,RASL11A,ASNS,ABCG2,SLC2…
1	!	0.000407	1584	993	116	0.117	0.073	GO:0030554	MF	3	adenyl nucleotide binding	6	SRR,STK38L,PSMC3,HLTF,MCM2,MYO9B,PRKACA,ATP4A,MVD,MLKL,ABCA1,CLPX,MAPKAPK2,TTLL12,DHX58,SGK2,SLC22A5,PDK4,SGK1,MKNK2,HSPA4,PSMC5,GALK1,ACLY,WRNIP1,ECI2,ACOT12,NADK2,MYH9,EIF4A2,PIM1,EIF2AK2,PI4K2A,AATK,TK1,ACADL,MAP4K4,XRCC5,FARSB,EPRS,NEK6,PKN3,TOR1B,TOR1A,ABCA2,ABCB11,UBE2L6,ITPKA,SLC27A2,ATP9A,AHCY,PMVK,NTRK1,EPHA7,VCP,PDE4B,PSMC2,ABCB1B,ABCB8,DCK,MMAB,ACTB,ASNS,ABCG2,SLC27A5,PSMC4,MYH14,DNHD1…
1	!	0.00279	185	993	25	0.025	0.135	GO:0046906	MF	3	tetrapyrrole binding	3	CYP51,CYP17A1,PXDN,NR1D1,CYC1,HRG,CYP39A1,CBS,CYP2U1,CYP4A31,CYP4B1,MMAB,CYP2B10,CYB5B,CYP2C37,CYP2C50,CYP3A11,CYP2D22,CYP4A32,CYP4A12A,CYP2C54,CYP2D40,CYP2C68,CYP4A12B,CYP2D10
1	!	0.00388	176	993	24	0.024	0.136	GO:0020037	MF	3	heme binding	4	CYP51,CYP17A1,PXDN,NR1D1,CYC1,HRG,CYP39A1,CBS,CYP2U1,CYP4A31,CYP4B1,CYP2B10,CYB5B,CYP2C37,CYP2C50,CYP3A11,CYP2D22,CYP4A32,CYP4A12A,CYP2C54,CYP2D40,CYP2C68,CYP4A12B,CYP2D10
1	!	3.34e-05	1773	993	131	0.132	0.074	GO:0008144	MF	3	drug binding	2	SRR,STK38L,SMO,PSMC3,HLTF,MCM2,FKBP11,MYO9B,PRKACA,ATP4A,GCAT,MVD,MLKL,ABCA1,CLPX,MAPKAPK2,TTLL12,DHX58,SGK2,SLC22A5,PDK4,SGK1,MKNK2,HSPA4,NAMPT,PSMC5,GALK1,ACLY,WRNIP1,ACOT12,DHFR,CHRNA2,NADK2,PPARA,MYH9,NR1I2,EIF4A2,PIM1,CBS,EIF2AK2,FASN,PI4K2A,AATK,TK1,MAP4K4,XRCC5,FARSB,AGXT,SCLY,EPRS,NEK6,PKN3,TOR1B,TOR1A,KYNU,ABCA2,ABCB11,LRP2,UBE2L6,ITPKA,SLC27A2,ATP9A,PMVK,NTRK1,CTH,EPHA7,VCP,CYP4B1,PSMC2…
1	!	0.000962	6034	993	343	0.345	0.057	GO:0043167	MF	3	ion binding	2	S100A6,SP1,SRR,CYP51,STK38L,CAPNS1,PSMC3,HLTF,IKZF4,NUDT14,MCM2,CYP17A1,CALR,MYO9B,LETM1,PRKACA,POR,ATP4A,NR1I3,FBLIM1,GCAT,MVD,CLSTN3,BMP7,OIT3,MLKL,SLC25A13,ABCA1,CLPX,STEAP2,LONRF3,MAPKAPK2,CMAH,TTLL12,DHX58,SGK2,SLC22A5,PDK4,CYB561,RTN4IP1,RSPO3,SGK1,ARG1,MICU1,MKNK2,HSPA4,ARSG,RNF144A,PXDN,PSMC5,GALK1,NR1D1,ACLY,TRAF3,WRNIP1,ECI2,NSD1,TERT,ACOT12,HMGCR,DHFR,ACOX2,HACL1,CHRNA2,MBNL2,NADK2,SQL…
1	!	0.00012	2782	993	184	0.185	0.066	GO:0043168	MF	3	anion binding	3	SRR,STK38L,PSMC3,HLTF,MCM2,MYO9B,PRKACA,POR,ATP4A,GCAT,MVD,BMP7,MLKL,ABCA1,CLPX,MAPKAPK2,TTLL12,DHX58,SGK2,SLC22A5,PDK4,RSPO3,SGK1,MKNK2,HSPA4,PSMC5,GALK1,ACLY,WRNIP1,ECI2,ACOT12,HMGCR,DHFR,ACOX2,HACL1,NADK2,SQLE,MYH9,HRG,EIF4A2,APP,PIM1,CBS,EIF2AK2,RELA,FASN,PI4K2A,AATK,SIRT3,TK1,PARD3,ARL10,ACADL,MAP4K4,XRCC5,TUBA4A,FARSB,AGXT,SCLY,EPRS,NEK6,PKN3,TOR1B,TOR1A,KYNU,ABCA2,ABCB11,UBE2L6,HSD17B12,IT…
1	!	0.0019	1867	993	129	0.13	0.069	GO:0035639	MF	3	purine ribonucleoside triphosphate binding	4	SRR,STK38L,PSMC3,HLTF,MCM2,MYO9B,PRKACA,ATP4A,MVD,MLKL,ABCA1,CLPX,MAPKAPK2,TTLL12,DHX58,SGK2,SLC22A5,PDK4,SGK1,MKNK2,HSPA4,PSMC5,GALK1,ACLY,WRNIP1,ACOT12,NADK2,MYH9,EIF4A2,PIM1,EIF2AK2,PI4K2A,AATK,TK1,ARL10,MAP4K4,XRCC5,TUBA4A,FARSB,EPRS,NEK6,PKN3,TOR1B,TOR1A,ABCA2,ABCB11,UBE2L6,ITPKA,SLC27A2,ATP9A,PMVK,NTRK1,EPHA7,VCP,PSMC2,ABCB1B,ABCB8,DCK,MMAB,ACTB,RASL11A,ASNS,ABCG2,SLC27A5,PSMC4,RAB30,MYH14,…
1	!	0.000357	2228	993	152	0.153	0.068	GO:0097367	MF	3	carbohydrate derivative binding	2	LGALS9,SRR,STK38L,PSMC3,HLTF,MCM2,MYO9B,PRKACA,POR,ATP4A,MVD,BMP7,MLKL,ABCA1,CLPX,MAPKAPK2,TTLL12,DHX58,SGK2,SLC22A5,PDK4,RSPO3,SGK1,MKNK2,HSPA4,PSMC5,GALK1,ACLY,WRNIP1,ECI2,ACOT12,NADK2,MYH9,HRG,EIF4A2,APP,PIM1,EIF2AK2,PI4K2A,AATK,TK1,ARL10,ACADL,MAP4K4,XRCC5,TUBA4A,FARSB,EPRS,NEK6,PKN3,TOR1B,TOR1A,ABCA2,ABCB11,UBE2L6,HSD17B12,ITPKA,SLC27A2,ATP9A,PMVK,NTRK1,EPHA7,VCP,PDE4B,PSMC2,RPL22,ABCB1B,ABC…
1	!	0.00179	1956	993	134	0.135	0.069	GO:0032553	MF	3	ribonucleotide binding	3	SRR,STK38L,PSMC3,HLTF,MCM2,MYO9B,PRKACA,POR,ATP4A,MVD,MLKL,ABCA1,CLPX,MAPKAPK2,TTLL12,DHX58,SGK2,SLC22A5,PDK4,SGK1,MKNK2,HSPA4,PSMC5,GALK1,ACLY,WRNIP1,ECI2,ACOT12,NADK2,MYH9,EIF4A2,PIM1,EIF2AK2,PI4K2A,AATK,TK1,ARL10,ACADL,MAP4K4,XRCC5,TUBA4A,FARSB,EPRS,NEK6,PKN3,TOR1B,TOR1A,ABCA2,ABCB11,UBE2L6,ITPKA,SLC27A2,ATP9A,PMVK,NTRK1,EPHA7,VCP,PDE4B,PSMC2,ABCB1B,ABCB8,DCK,MMAB,ACTB,RASL11A,ASNS,ABCG2,SLC27…
1	!	0.00191	1940	993	133	0.134	0.069	GO:0032555	MF	3	purine ribonucleotide binding	4	SRR,STK38L,PSMC3,HLTF,MCM2,MYO9B,PRKACA,ATP4A,MVD,MLKL,ABCA1,CLPX,MAPKAPK2,TTLL12,DHX58,SGK2,SLC22A5,PDK4,SGK1,MKNK2,HSPA4,PSMC5,GALK1,ACLY,WRNIP1,ECI2,ACOT12,NADK2,MYH9,EIF4A2,PIM1,EIF2AK2,PI4K2A,AATK,TK1,ARL10,ACADL,MAP4K4,XRCC5,TUBA4A,FARSB,EPRS,NEK6,PKN3,TOR1B,TOR1A,ABCA2,ABCB11,UBE2L6,ITPKA,SLC27A2,ATP9A,PMVK,NTRK1,EPHA7,VCP,PDE4B,PSMC2,ABCB1B,ABCB8,DCK,MMAB,ACTB,RASL11A,ASNS,ABCG2,SLC27A5,P…
1	!	0.000522	1574	993	115	0.116	0.073	GO:0032559	MF	3	adenyl ribonucleotide binding	5	SRR,STK38L,PSMC3,HLTF,MCM2,MYO9B,PRKACA,ATP4A,MVD,MLKL,ABCA1,CLPX,MAPKAPK2,TTLL12,DHX58,SGK2,SLC22A5,PDK4,SGK1,MKNK2,HSPA4,PSMC5,GALK1,ACLY,WRNIP1,ECI2,ACOT12,NADK2,MYH9,EIF4A2,PIM1,EIF2AK2,PI4K2A,AATK,TK1,ACADL,MAP4K4,XRCC5,FARSB,EPRS,NEK6,PKN3,TOR1B,TOR1A,ABCA2,ABCB11,UBE2L6,ITPKA,SLC27A2,ATP9A,PMVK,NTRK1,EPHA7,VCP,PDE4B,PSMC2,ABCB1B,ABCB8,DCK,MMAB,ACTB,ASNS,ABCG2,SLC27A5,PSMC4,MYH14,DNHD1,ATP1…
1	!	0.000665	1511	993	111	0.112	0.073	GO:0005524	MF	3	ATP binding	6	SRR,STK38L,PSMC3,HLTF,MCM2,MYO9B,PRKACA,ATP4A,MVD,MLKL,ABCA1,CLPX,MAPKAPK2,TTLL12,DHX58,SGK2,SLC22A5,PDK4,SGK1,MKNK2,HSPA4,PSMC5,GALK1,ACLY,WRNIP1,ACOT12,NADK2,MYH9,EIF4A2,PIM1,EIF2AK2,PI4K2A,AATK,TK1,MAP4K4,XRCC5,FARSB,EPRS,NEK6,PKN3,TOR1B,TOR1A,ABCA2,ABCB11,UBE2L6,ITPKA,SLC27A2,ATP9A,PMVK,NTRK1,EPHA7,VCP,PSMC2,ABCB1B,ABCB8,DCK,MMAB,ACTB,ASNS,ABCG2,SLC27A5,PSMC4,MYH14,DNHD1,ATP11A,FGFR1,JAK3,AAR…
1	!	7.9e-22	5935	993	416	0.419	0.07	GO:0003824	MF	14	catalytic activity	1	NARF,SCPEP1,KAT2B,SRR,CYP51,STK38L,DDT,CAPNS1,PSMC3,HLTF,NUDT14,MCM2,LIPE,FKBP11,INMT,CYP17A1,MMD,MYO9B,PRKACA,POR,ATP4A,CS,GCAT,ELOVL1,MVD,PPP2R1A,KDSR,SLC3A2,GFOD2,ST3GAL1,ABCA1,CLPX,STEAP2,HSD11B1,LONRF3,MAPKAPK2,CMAH,EXOSC10,DHX58,SGK2,ATP5G3,ATP6V0A1,PDK4,CYB561,RTN4IP1,SGK1,ARG1,VNN3,MKNK2,NAMPT,ARSG,RNF144A,NCOA1,PXDN,PSMC5,GALK1,DHRS13,ACLY,DHRS7,FDFT1,TRAF3,GPLD1,WRNIP1,ECI2,NSD1,TERT,AC…
1	!	0.0106	2398	993	154	0.155	0.064	GO:0016740	MF	14	transferase activity	2	KAT2B,STK38L,HLTF,INMT,MMD,PRKACA,CS,GCAT,ELOVL1,ST3GAL1,LONRF3,MAPKAPK2,SGK2,PDK4,SGK1,MKNK2,NAMPT,RNF144A,NCOA1,GALK1,ACLY,FDFT1,TRAF3,NSD1,TERT,PLAU,NADK2,TYMP,ST3GAL6,PARP3,ACAT2,PIM1,EIF2AK2,QPCT,DNTT,TRIM8,GSTO1,FASN,PI4K2A,AATK,TALDO1,TK1,MAP4K4,AGXT,NEK6,PKN3,UBE2L6,GATM,ITPKA,UBOX5,CRLS1,GSTM4,PMVK,NTRK1,CTH,TSTD3,EPHA7,NANS,ST3GAL3,EXTL1,CLOCK,SULT1B1,SULT1D1,DCK,PRKAB1,MMAB,ZC3HAV1,NAT…
1	!	1.04e-09	810	993	85	0.086	0.105	GO:0016491	MF	14	oxidoreductase activity	2	NARF,CYP51,CYP17A1,POR,KDSR,GFOD2,STEAP2,HSD11B1,CMAH,CYB561,RTN4IP1,PXDN,DHRS13,DHRS7,HMGCR,DHFR,ACOX2,SQLE,CYC1,EHHADH,CYP39A1,CBS,FADS3,ALDH1A7,GSTO1,FASN,NDUFB8,PAOX,ACADL,HSD17B7,HSD17B12,SORD,BMP2,CYP2U1,GPX7,CYP4A31,CYP4B1,SESN2,PGD,MTHFR,UGDH,HSD17B11,MTHFD2L,CYP2B10,IDH2,NOX4,PDILT,NSDHL,MSMO1,HSD17B2,DUS2,SC5D,ETFA,SRXN1,GSTT2,DIO1,ALDH1B1,DECR2,UQCRFS1,AKR1D1,RSAD1,FMO2,FMO1,CYP2C37,FA…
1	!	0.000166	149	993	24	0.024	0.161	GO:0004497	MF	14	monooxygenase activity	3	CYP51,CYP17A1,CMAH,SQLE,CYP39A1,CYP2U1,CYP4A31,CYP4B1,CYP2B10,MSMO1,FMO2,FMO1,CYP2C37,AGMO,CYP2C50,CYP3A11,CYP2D22,CYP4A32,CYP4A12A,CYP2C54,CYP2D40,CYP2C68,CYP4A12B,CYP2D10
1	!	0.00175	205	993	27	0.027	0.132	GO:0016705	MF	14	oxidoreductase activity, acting on paired donors, with incorporation or reduction of molecular oxygen	3	CYP51,CYP17A1,POR,CMAH,SQLE,CYP39A1,CYP2U1,CYP4A31,CYP4B1,CYP2B10,PDILT,MSMO1,SC5D,FMO2,FMO1,CYP2C37,AGMO,CYP2C50,CYP3A11,CYP2D22,CYP4A32,CYP4A12A,CYP2C54,CYP2D40,CYP2C68,CYP4A12B,CYP2D10
1	!	0.0146	2545	993	161	0.162	0.063	GO:0016787	MF	14	hydrolase activity	2	SCPEP1,CAPNS1,PSMC3,HLTF,NUDT14,MCM2,LIPE,MYO9B,POR,ATP4A,PPP2R1A,ABCA1,CLPX,EXOSC10,DHX58,ATP5G3,ATP6V0A1,ARG1,VNN3,ARSG,PSMC5,GPLD1,WRNIP1,ACOT12,PLAU,RNASEH2B,TAB1,MYH9,ARSA,EIF4A2,SYNJ2,IMPA2,LIPA,ACY3,CAPN1,FASN,CPN1,ABHD6,PTPRJ,SIRT3,ATP5C1,ADAM23,RHBDD1,XRCC5,TUBA4A,DESI2,PTER,TOR1B,TOR1A,KYNU,PSMD14,ABCA2,DYNC1I2,ABCB11,LPIN3,GINS1,ZBP1,ATP9A,CAR1,CAR3,AHCY,ADAR,ATP6V0D2,VCP,USP24,PDE4B,C…
1	!	0.00475	864	993	70	0.07	0.081	GO:0016817	MF	14	hydrolase activity, acting on acid anhydrides	3	PSMC3,HLTF,NUDT14,MCM2,MYO9B,ATP4A,ABCA1,CLPX,DHX58,ATP5G3,ATP6V0A1,PSMC5,WRNIP1,MYH9,EIF4A2,ATP5C1,XRCC5,TUBA4A,TOR1B,TOR1A,ABCA2,DYNC1I2,ABCB11,GINS1,ATP9A,ATP6V0D2,VCP,PSMC2,ABCB1B,ABCB8,RASL11A,GNGT1,ABCG2,PSMC4,RAB30,MYH14,DNHD1,LHPP,ATP11A,NUDT7,SMARCA4,GNG11,EEFSEC,DNM2,DDX19B,RECQL4,INO80,GNAT1,TUBB4B,TAP1,ATP11B,ATP5L,ATP8B1,RHOU,DDX58,ABCB1A,DDX24,ABCA8A,DCTPP1,ABCB4,TUBA1C,IRGM1,ARL4A,…
1	!	0.00475	864	993	70	0.07	0.081	GO:0016818	MF	14	hydrolase activity, acting on acid anhydrides, in phosphorus-containing anhydrides	4	PSMC3,HLTF,NUDT14,MCM2,MYO9B,ATP4A,ABCA1,CLPX,DHX58,ATP5G3,ATP6V0A1,PSMC5,WRNIP1,MYH9,EIF4A2,ATP5C1,XRCC5,TUBA4A,TOR1B,TOR1A,ABCA2,DYNC1I2,ABCB11,GINS1,ATP9A,ATP6V0D2,VCP,PSMC2,ABCB1B,ABCB8,RASL11A,GNGT1,ABCG2,PSMC4,RAB30,MYH14,DNHD1,LHPP,ATP11A,NUDT7,SMARCA4,GNG11,EEFSEC,DNM2,DDX19B,RECQL4,INO80,GNAT1,TUBB4B,TAP1,ATP11B,ATP5L,ATP8B1,RHOU,DDX58,ABCB1A,DDX24,ABCA8A,DCTPP1,ABCB4,TUBA1C,IRGM1,ARL4A,…
1	!	0.00823	861	993	69	0.069	0.08	GO:0016462	MF	14	pyrophosphatase activity	5	PSMC3,HLTF,NUDT14,MCM2,MYO9B,ATP4A,ABCA1,CLPX,DHX58,ATP5G3,ATP6V0A1,PSMC5,WRNIP1,MYH9,EIF4A2,ATP5C1,XRCC5,TUBA4A,TOR1B,TOR1A,ABCA2,DYNC1I2,ABCB11,GINS1,ATP9A,ATP6V0D2,VCP,PSMC2,ABCB1B,ABCB8,RASL11A,GNGT1,ABCG2,PSMC4,RAB30,MYH14,DNHD1,LHPP,ATP11A,SMARCA4,GNG11,EEFSEC,DNM2,DDX19B,RECQL4,INO80,GNAT1,TUBB4B,TAP1,ATP11B,ATP5L,ATP8B1,RHOU,DDX58,ABCB1A,DDX24,ABCA8A,DCTPP1,ABCB4,TUBA1C,IRGM1,ARL4A,ATP5K,…
1	!	0.0104	817	993	66	0.066	0.081	GO:0017111	MF	14	nucleoside-triphosphatase activity	6	PSMC3,HLTF,MCM2,MYO9B,ATP4A,ABCA1,CLPX,DHX58,ATP5G3,ATP6V0A1,PSMC5,WRNIP1,MYH9,EIF4A2,ATP5C1,XRCC5,TUBA4A,TOR1B,TOR1A,ABCA2,DYNC1I2,ABCB11,GINS1,ATP9A,ATP6V0D2,VCP,PSMC2,ABCB1B,ABCB8,RASL11A,GNGT1,ABCG2,PSMC4,RAB30,MYH14,DNHD1,ATP11A,SMARCA4,GNG11,EEFSEC,DNM2,DDX19B,RECQL4,INO80,GNAT1,TUBB4B,TAP1,ATP11B,ATP5L,ATP8B1,RHOU,DDX58,ABCB1A,DDX24,ABCA8A,ABCB4,TUBA1C,IRGM1,ARL4A,ATP5K,IDE,GNAI1,ATP8B4,RA…
1	!	3.5e-05	422	993	47	0.047	0.111	GO:0016887	MF	14	ATPase activity	7	PSMC3,HLTF,MYO9B,ATP4A,ABCA1,CLPX,ATP5G3,ATP6V0A1,PSMC5,WRNIP1,MYH9,EIF4A2,ATP5C1,XRCC5,TOR1B,TOR1A,ABCA2,DYNC1I2,ABCB11,ATP9A,ATP6V0D2,VCP,PSMC2,ABCB1B,ABCB8,ABCG2,PSMC4,MYH14,DNHD1,ATP11A,SMARCA4,DDX19B,RECQL4,INO80,TAP1,ATP11B,ATP5L,ATP8B1,ABCB1A,DDX24,ABCA8A,ABCB4,ATP5K,IDE,ATP8B4,RNF213,HSPA1A
1	!	0.00114	345	993	38	0.038	0.11	GO:0042623	MF	14	ATPase activity, coupled	8	PSMC3,ATP4A,ABCA1,CLPX,ATP5G3,ATP6V0A1,PSMC5,MYH9,EIF4A2,ATP5C1,XRCC5,ABCA2,DYNC1I2,ABCB11,ATP9A,ATP6V0D2,PSMC2,ABCB1B,ABCB8,ABCG2,PSMC4,MYH14,DNHD1,ATP11A,SMARCA4,DDX19B,RECQL4,INO80,TAP1,ATP11B,ATP5L,ATP8B1,ABCB1A,DDX24,ABCA8A,ABCB4,ATP8B4,HSPA1A
1	!	0.00155	133	993	21	0.021	0.158	GO:0043492	MF	14	ATPase activity, coupled to movement of substances	9	ATP4A,ABCA1,ATP5G3,ATP6V0A1,ATP5C1,ABCA2,ABCB11,ATP9A,ATP6V0D2,ABCB1B,ABCB8,ABCG2,ATP11A,TAP1,ATP11B,ATP5L,ATP8B1,ABCB1A,ABCA8A,ABCB4,ATP8B4
1	!	0.00856	22	993	8	0.008	0.364	GO:0004012	MF	14	phospholipid-translocating ATPase activity	10	ABCA1,ATP9A,ATP11A,ATP11B,ATP8B1,ABCB1A,ABCB4,ATP8B4

## Sheet: Edited
Gene_Term	p-value	T	Q	Q&T	Enrichment Scores (%)	Gene_Category	Gene_Identity
hydrogen sulfide biosynthetic process	0.0115	4	993	4	100	BP	SP1,CBS,CTH,MPST
sulfur amino acid biosynthetic process	0.0216	18	993	7	38.9	BP	CBS,AHCY,CTH,MTHFR,MTHFD2L,GM5096,BHMT
hydrogen sulfide metabolic process	0.003	6	993	5	83.3	BP	SP1,CBS,CTH,ETHE1,MPST
cysteine metabolic process	0.00273	14	993	7	50	BP	CBS,AGXT,AHCY,GCLM,CTH,AHCYL2,MPST
phospholipid translocation	0.0256	25	993	8	32	BP	ABCA1,ATP9A,ATP11A,ATP11B,ATP8B1,ABCB1A,ABCB4,ATP8B4
cytosolic small ribosomal subunit	1.41e-07	45	993	16	35.6	CC	RPS11,RPS9,RPS18,RPS5,RPS14,RPS24,RPS20,RPS29,RPS16,FAU,RPS8,RPS23,RPS27RT,RPS7,RPS28,RPS27
methionine metabolic process	0.0485	20	993	7	35	BP	AHCY,CTH,MTHFR,MTHFD2L,AHCYL2,GM5096,BHMT
negative regulation of gluconeogenesis	0.0126	23	993	8	34.8	BP	SERPINA12,GCK,LEPR,MUP11,MUP18,MUP16,MUP9,MUP12
positive regulation of steroid biosynthetic process	0.0256	25	993	8	32	BP	CYP17A1,POR,SREBF1,NR1D1,STARD4,FGF1,BMP6,FDPS
serine family amino acid metabolic process	0.00222	39	993	11	28.2	BP	SRR,GCAT,CBS,AGXT,SCLY,AHCY,GCLM,CTH,AHCYL2,GLYAT,MPST
small ribosomal subunit	1.94e-05	77	993	18	23.4	CC	RPS11,RPS9,RPS18,RPS5,RPS14,RPS24,RPS20,RPS29,RPS16,FAU,MRPS27,RPS8,RPS23,RPS27RT,NPM1,RPS7,RPS28,RPS27
cytosolic ribosome	1.83e-07	126	993	26	20.6	CC	RPS11,RPS9,RPS18,RPS5,RPS14,RPS24,RPS20,RPL22,RPS29,RPS16,RPL10A,FAU,RPL12,RPL22L1,RPL9,RPS8,RPS23,RPS27RT,RPL32,RPS7,RPL35,RPS28,RPL13A,RPL39,RPS27,RPL41
positive regulation of lipid biosynthetic process	0.00711	80	993	15	18.8	BP	CYP17A1,POR,MID1IP1,PLIN5,AVPR1A,SREBF1,NR1D1,STARD4,ABHD6,SLC45A3,APOA5,LDLR,FGF1,BMP6,FDPS
response to sterol	0.0356	26	993	8	30.8	BP	SMO,ABCA1,GPLD1,ABCA2,PMVK,RORC,INSIG1,HMGCS1
drug transmembrane transporter activity	0.0115	83	993	15	18.1	MF	SLC25A1,AQP1,SLC25A13,SLC22A5,SLC25A22,SLC1A4,SLC36A1,SLC25A29,ABCB11,ABCB1B,ABCG2,SLC25A15,SLC7A2,SLC38A7,ABCB1A
response to peptide	0.000197	475	993	49	10.3	BP	KAT2B,SP1,POR,CAV1,BMP7,RARRES2,PDK4,SGK1,ARG1,CRY1,AVPR1A,BTG2,SREBF1,STAT5B,GPLD1,PPARA,RANGAP1,CYC1,APP,RELA,RBP4,BAIAP2,CPEB1,IGFBP5,EPRS,NR4A2,GATM,ZBTB7B,SESN2,SLC25A33,ABCG2,BTG1,PIK3R1,SERPINA12,GCK,SHC1,PCSK9,GJB2,CFL1,TRP53,CXCL12,SORT1,JUND,MUP11,GGH,MUP18,MUP16,MUP9,MUP12
cytoplasmic translation	0.0181	86	993	15	17.4	BP	CPEB1,RPS20,RPL22,AARS,RPS29,RPL10A,RPL22L1,RPL9,RPS23,RPL32,RPS7,RPS28,RPL13A,RPL39,RPL41
response to monosaccharide	0.0208	233	993	27	11.6	BP	PRKACA,SREBF1,NR1D1,GPLD1,HMGCR,MAP4K4,MPC2,GCLM,SESN2,ATG7,NOX4,STX4A,SMARCA4,TXNIP,THBS1,GCK,PRKCE,LEPR,PTK2B,ACVR2B,LGALS1,RAP1A,MUP11,MUP18,MUP16,MUP9,MUP12
response to hexose	0.0108	225	993	27	12	BP	PRKACA,SREBF1,NR1D1,GPLD1,HMGCR,MAP4K4,MPC2,GCLM,SESN2,ATG7,NOX4,STX4A,SMARCA4,TXNIP,THBS1,GCK,PRKCE,LEPR,PTK2B,ACVR2B,LGALS1,RAP1A,MUP11,MUP18,MUP16,MUP9,MUP12
response to glucose	0.00765	221	993	27	12.2	BP	PRKACA,SREBF1,NR1D1,GPLD1,HMGCR,MAP4K4,MPC2,GCLM,SESN2,ATG7,NOX4,STX4A,SMARCA4,TXNIP,THBS1,GCK,PRKCE,LEPR,PTK2B,ACVR2B,LGALS1,RAP1A,MUP11,MUP18,MUP16,MUP9,MUP12
toxin metabolic process	0.0256	25	993	8	32	BP	SP1,CBS,GSTO1,CTH,FMO2,FMO1,ETHE1,MPST
positive regulation of lipid metabolic process	5.01e-06	156	993	27	17.3	BP	ANGPTL4,CYP17A1,POR,MID1IP1,PLIN5,AVPR1A,SREBF1,NR1D1,PPARA,STARD4,ABHD6,SLC45A3,APOA5,LDLR,FGF1,BMP6,ADORA1,PRKCE,FGFR3,PTK2B,FDPS,MUP11,MLYCD,MUP18,MUP16,MUP9,MUP12
sulfur amino acid metabolic process	0.000173	38	993	12	31.6	BP	CBS,AGXT,AHCY,GCLM,CTH,MTHFR,MTHFD2L,AHCYL2,NOX4,GM5096,MPST,BHMT
sulfur compound metabolic process	7.17e-12	274	993	47	17.2	BP	SP1,CS,ELOVL1,MVD,PDK4,ARSG,ACLY,STAT5B,ACOT12,EHHADH,CBS,GSTO1,FASN,AGXT,MPC2,KYNU,AHCY,GSTM4,PMVK,GCLM,CTH,MTHFR,SULT1B1,SULT1D1,MTHFD2L,AHCYL2,NAT8,NOX4,NUDT7,GSTA4,ACPP,GSTT2,ACOT11,GGT6,MVK,ACACB,ACOT4,MAT2A,CES1D,GLYAT,ETHE1,GM5096,ACNAT1,MPST,ACOT1,MLYCD,BHMT
monooxygenase activity	0.000166	149	993	24	16.1	MF	CYP51,CYP17A1,CMAH,SQLE,CYP39A1,CYP2U1,CYP4A31,CYP4B1,CYP2B10,MSMO1,FMO2,FMO1,CYP2C37,AGMO,CYP2C50,CYP3A11,CYP2D22,CYP4A32,CYP4A12A,CYP2C54,CYP2D40,CYP2C68,CYP4A12B,CYP2D10
regulation of lipid localization	0.00385	152	993	22	14.5	BP	PLIN5,ABCA1,CRY1,IGFBP3,PPARA,SREBF2,ACAT2,ABCA2,APOA5,BMP6,THBS1,ACACB,IKBKE,ABCB4,ZC3H12A,PCSK9,PLA2R1,MUP11,MUP18,MUP16,MUP9,MUP12
lipid storage	0.0036	76	993	15	19.7	BP	CAV1,PLIN5,CRY1,STAT5B,PPARA,SREBF2,STARD4,ACACB,IKBKE,ZC3H12A,MUP11,MUP18,MUP16,MUP9,MUP12
regulation of lipid storage	0.0383	51	993	11	21.6	BP	PLIN5,PPARA,SREBF2,ACACB,IKBKE,ZC3H12A,MUP11,MUP18,MUP16,MUP9,MUP12
cellular hormone metabolic process	0.0483	93	993	15	16.1	BP	SCPEP1,CYP17A1,STAT5B,RBP4,HSD17B7,HSD17B12,BMP2,SCHIP1,HSD17B11,HSD17B2,AKR1D1,BMP6,RETSAT,CYP2D22,RDH11
carboxylic acid transmembrane transporter activity	0.00155	133	993	21	15.8	MF	SLC25A1,SLC3A2,SLC25A13,SLC25A22,SLC16A7,SLC1A4,SLC36A1,SLC25A29,SLC10A2,SERINC2,SLC23A1,MPC2,ABCB11,SLC27A2,SLCO1A4,SLC27A5,SLC25A15,SLC7A2,SLCO2A1,SLC38A7,SLC7A5
nitrogen compound transport	0.000125	1992	993	141	7.1	BP	TOM1L2,VPREB3,SNAPIN,LGALS9,PCNT,KPNB1,SMO,CALR,PHB2,AQP1,PRKACA,TOMM40L,SLC5A6,DMAP1,SLC3A2,FUZ,SLC25A13,ABCA1,NUP50,VPS53,SRSF1,SLC22A5,SLC25A22,ARG1,AVPR1A,SLC1A4,SLC36A1,HSPA4,SREBF1,NR1D1,SLC25A29,SLC17A1,SSR1,HMGCR,AP3M1,BNIP3L,RANGAP1,MYH9,IL1RAP,GPIHBP1,PMM2,KRT18,SERINC2,RBP4,SIRT3,CPEB1,PARD3,MAP4K4,RHBDD1,MFF,AHCTF1,COPA,MPC2,TOR1A,LRP2,PEX16,ADAR,ZBTB7B,LMNA,RORC,UBAP1,VCP,SLC25A33,CL…
amide transport	0.0253	1687	993	114	6.8	BP	TOM1L2,VPREB3,SNAPIN,LGALS9,PCNT,KPNB1,SMO,CALR,PHB2,AQP1,PRKACA,TOMM40L,SLC5A6,DMAP1,FUZ,ABCA1,NUP50,VPS53,HSPA4,SREBF1,NR1D1,SSR1,HMGCR,AP3M1,BNIP3L,RANGAP1,MYH9,IL1RAP,GPIHBP1,PMM2,KRT18,RBP4,SIRT3,PARD3,MAP4K4,RHBDD1,MFF,AHCTF1,COPA,MPC2,TOR1A,LRP2,PEX16,ADAR,ZBTB7B,LMNA,RORC,UBAP1,VCP,CLOCK,RILPL1,EXOC4,ATG7,TNFRSF1A,IDH2,ZFAND6,STX4A,BBS2,WWP2,CMTM6,GORASP1,ANK2,DNM2,VPS18,RAMP1,FRAS1,DENND…
organic substance transport	1.61e-10	2381	993	185	7.8	BP	TOM1L2,VPREB3,SNAPIN,LGALS9,PCNT,KPNB1,SMO,SLC25A1,CALR,PHB2,AQP1,PRKACA,TOMM40L,SLC5A6,CAV1,RARRES2,DMAP1,SLC3A2,FUZ,SLC25A13,ABCA1,NUP50,VPS53,SRSF1,SLC22A5,SLC25A22,ARG1,CRY1,SLC16A7,AVPR1A,SLC1A4,SLC36A1,HSPA4,IGFBP3,SREBF1,NR1D1,SLC25A29,SLC17A1,SSR1,TERT,HMGCR,AP3M1,BNIP3L,PPARA,RANGAP1,MYH9,SREBF2,IL1RAP,GPIHBP1,PMM2,KRT18,SLC10A2,SERINC2,ACAT2,SLC23A1,STARD4,RBP4,SIRT3,CPEB1,PARD3,MAP4K4,…
organic acid transport	0.00176	296	993	34	11.5	BP	SLC25A1,SLC5A6,SLC3A2,SLC25A13,SLC25A22,ARG1,SLC16A7,AVPR1A,SLC1A4,SLC36A1,SLC25A29,SLC10A2,SERINC2,SLC23A1,RBP4,AGXT,MPC2,EPRS,ABCB11,LRP2,SLC27A2,SLCO1A4,SLC27A5,AQP8,SLC25A15,SLC7A2,SLCO2A1,SLC38A7,SLC7A5,THBS1,ADORA1,ABCB4,PLA2R1,NTRK2
lipid transport	0.00886	332	993	35	10.5	BP	CAV1,ABCA1,CRY1,IGFBP3,PPARA,SREBF2,GPIHBP1,SLC10A2,ACAT2,STARD4,RBP4,EPRS,ABCA2,ABCB11,SLC27A2,ATP9A,SLCO1A4,SLC27A5,AQP8,ATP11A,APOA5,LDLR,SLCO2A1,SIGMAR1,ATP11B,BMP6,ATP8B1,THBS1,ABCB1A,ABCA8A,ABCB4,PCSK9,PLA2R1,APOL9A,ATP8B4
lipid translocation	0.0356	26	993	8	30.8	BP	ABCA1,ATP9A,ATP11A,ATP11B,ATP8B1,ABCB1A,ABCB4,ATP8B4
ion transport	0.0189	1567	993	108	6.9	BP	S100A6,IL16,SLC25A1,AQP1,LETM1,ATP4A,TOMM40L,SLC5A6,CAV1,SLC3A2,SLC41A1,CLIC3,SLC25A13,ABCA1,STEAP2,ATP5G3,SLC22A5,SLC25A22,ATP6V0A1,SGK1,ARG1,SLC16A7,MICU1,AVPR1A,SLC1A4,SLC36A1,SLC25A29,SLC17A1,CHRNA2,CYC1,SLC10A2,SERINC2,SLC23A1,RBP4,GSTO1,ATP5C1,SLC40A1,AGXT,MPC2,EPRS,TOR1A,ABCB11,LRP2,SLC27A2,SLC20A1,ATP9A,ASIC5,ATP6V0D2,PDE4B,ABCG2,SLC13A4,SLCO1A4,SLC27A5,AQP8,ATP11A,RASA3,SLC25A15,FGFR1,SL…
anion transport	8.69e-05	564	993	56	9.9	BP	SLC25A1,SLC5A6,SLC3A2,CLIC3,SLC25A13,ABCA1,SLC22A5,SLC25A22,ARG1,SLC16A7,AVPR1A,SLC1A4,SLC36A1,SLC25A29,SLC17A1,SLC10A2,SERINC2,SLC23A1,RBP4,AGXT,MPC2,EPRS,ABCB11,LRP2,SLC27A2,SLC20A1,ATP9A,ABCG2,SLC13A4,SLCO1A4,SLC27A5,AQP8,ATP11A,SLC25A15,FGFR1,SLC7A2,APOA5,LDLR,SLCO2A1,SLC22A15,TTYH2,SLC38A7,CLIC4,ATP11B,ATP8B1,SLC7A5,THBS1,ABCB1A,ADORA1,ABCB4,SLC22A26,PLA2R1,NTRK2,ATP8B4,G6PC,GM6614
organic anion transport	2.56e-06	429	993	50	11.7	BP	SLC25A1,SLC5A6,SLC3A2,SLC25A13,ABCA1,SLC22A5,SLC25A22,ARG1,SLC16A7,AVPR1A,SLC1A4,SLC36A1,SLC25A29,SLC17A1,SLC10A2,SERINC2,SLC23A1,RBP4,AGXT,MPC2,EPRS,ABCB11,LRP2,SLC27A2,ATP9A,ABCG2,SLCO1A4,SLC27A5,AQP8,ATP11A,SLC25A15,SLC7A2,APOA5,LDLR,SLCO2A1,SLC22A15,SLC38A7,ATP11B,ATP8B1,SLC7A5,THBS1,ABCB1A,ADORA1,ABCB4,SLC22A26,PLA2R1,NTRK2,ATP8B4,G6PC,GM6614
carboxylic acid transport	0.0015	294	993	34	11.6	BP	SLC25A1,SLC5A6,SLC3A2,SLC25A13,SLC25A22,ARG1,SLC16A7,AVPR1A,SLC1A4,SLC36A1,SLC25A29,SLC10A2,SERINC2,SLC23A1,RBP4,AGXT,MPC2,EPRS,ABCB11,LRP2,SLC27A2,SLCO1A4,SLC27A5,AQP8,SLC25A15,SLC7A2,SLCO2A1,SLC38A7,SLC7A5,THBS1,ADORA1,ABCB4,PLA2R1,NTRK2
mitochondrial transport	0.000868	198	993	27	13.6	BP	SLC25A1,LETM1,TOMM40L,SLC25A13,SLC25A22,MICU1,HSPA4,SREBF1,SLC25A29,SLC25A48,BNIP3L,CYC1,SLC25A45,MFF,MPC2,SLC25A33,SLC35F6,SLC25A15,SLC25A20,TIMM8A1,SLC25A47,SLC25A44,IMMP2L,TRP53,BNIP3,TOMM5,TMEM102
transmembrane transport	0.00148	1465	993	107	7.3	BP	S100A6,SLC25A1,AQP1,LETM1,ATP4A,TOMM40L,SLC5A6,CAV1,RARRES2,SLC3A2,SLC41A1,CLIC3,SLC25A13,ABCA1,STEAP2,ATP5G3,SLC22A5,SLC25A22,ATP6V0A1,SLC16A7,MICU1,SLC1A4,SLC36A1,SLC25A29,SLC17A1,SLC25A48,TERT,CHRNA2,CYC1,GPIHBP1,SLC10A2,SLC23A1,SLC25A45,RBP4,GSTO1,ATP5C1,SLC40A1,SLC45A3,MPC2,ABCA2,ABCB11,LRP2,SLC43A3,PEX16,SLC20A1,TMEM144,ASIC5,ATP6V0D2,PDE4B,SESN2,ABCB1B,ABCB8,SLC25A33,SLC35F6,ACTB,ABCG2,SLC…
organic acid transmembrane transport	0.000959	108	993	19	17.6	BP	SLC25A1,SLC5A6,SLC3A2,SLC25A13,SLC25A22,SLC16A7,SLC1A4,SLC36A1,SLC25A29,SLC23A1,RBP4,MPC2,LRP2,SLC27A5,SLC25A15,SLC7A2,SLC38A7,SLC7A5,THBS1
carboxylic acid transmembrane transport	0.000959	108	993	19	17.6	BP	SLC25A1,SLC5A6,SLC3A2,SLC25A13,SLC25A22,SLC16A7,SLC1A4,SLC36A1,SLC25A29,SLC23A1,RBP4,MPC2,LRP2,SLC27A5,SLC25A15,SLC7A2,SLC38A7,SLC7A5,THBS1
drug transport	0.0308	198	993	24	12.1	BP	SLC25A1,AQP1,SLC5A6,SLC25A13,SLC22A5,SLC25A22,ARG1,SLC36A1,SLC25A29,CLDN1,NR1I2,RBP4,TOR1A,ABCB11,LRP2,ABCB1B,ABCG2,SLC25A15,SLC7A2,SLC38A7,CAR14,ATP8B1,ABCB1A,CXCL12
drug transmembrane transport	0.0036	76	993	15	19.7	BP	SLC25A1,AQP1,SLC25A13,SLC25A22,SLC25A29,RBP4,ABCB11,LRP2,ABCB1B,ABCG2,SLC25A15,SLC7A2,SLC38A7,ATP8B1,ABCB1A
regulation of gluconeogenesis	0.00909	53	993	12	22.6	BP	KAT2B,NR1D1,PPARA,SESN2,SERPINA12,GCK,LEPR,MUP11,MUP18,MUP16,MUP9,MUP12
organic acid transmembrane transporter activity	0.00176	134	993	21	15.7	MF	SLC25A1,SLC3A2,SLC25A13,SLC25A22,SLC16A7,SLC1A4,SLC36A1,SLC25A29,SLC10A2,SERINC2,SLC23A1,MPC2,ABCB11,SLC27A2,SLCO1A4,SLC27A5,SLC25A15,SLC7A2,SLCO2A1,SLC38A7,SLC7A5
positive regulation of small molecule metabolic process	0.00061	148	993	23	15.5	BP	KAT2B,POR,MID1IP1,PLIN5,AVPR1A,SREBF1,NR1D1,PPARA,STARD4,SLC45A3,VCP,APOA5,FGF1,BMP6,GCK,PRKCE,FDPS,MUP11,MLYCD,MUP18,MUP16,MUP9,MUP12
cellular modified amino acid metabolic process	0.000305	165	993	25	15.2	BP	POR,SLC22A5,VNN3,STAT5B,DHFR,SERINC2,GSTO1,GATM,AHCY,GSTM4,GCLM,CTH,MTHFR,SULT1B1,MTHFD2L,AHCYL2,NAT8,GSTA4,GSTT2,GGT6,ETHE1,MTHFS,GM5096,GGH,BHMT
organic hydroxy compound metabolic process	2.47e-13	438	993	64	14.6	BP	CYP51,DDT,LIPE,POR,MVD,ABCA1,SREBF1,GALK1,NR1D1,FDFT1,HMGCR,DHFR,SQLE,SREBF2,APP,SYNJ2,CYP39A1,STARD4,IMPA2,ALDH1A7,LIPA,RBP4,HSD17B7,NR4A2,SORD,ITPKA,BMP2,SLC27A2,PMVK,CYP4A31,SULT1B1,SULT1D1,SLC27A5,ACER3,NSDHL,FGFR1,MSMO1,SC5D,APOA5,LDLR,LSS,GDE1,CEBPA,ALDH1B1,FGF1,AKR1D1,BMP6,ATP8B1,SERPINA12,MVK,ADRBK2,PCSK9,INSIG1,RETSAT,CES1D,LEPR,DHCR7,PTK2B,TRP53,FDPS,CYP2D22,CYP4A32,RDH11,HMGCS1
response to insulin	0.00444	254	993	30	11.8	BP	KAT2B,SP1,RARRES2,PDK4,SGK1,CRY1,SREBF1,GPLD1,PPARA,RELA,RBP4,BAIAP2,CPEB1,EPRS,ZBTB7B,SESN2,SLC25A33,ABCG2,PIK3R1,SERPINA12,GCK,SHC1,PCSK9,SORT1,MUP11,GGH,MUP18,MUP16,MUP9,MUP12
regulation of lipid biosynthetic process	1.02e-05	161	993	27	16.8	BP	CYP17A1,POR,MID1IP1,PLIN5,PDK4,AVPR1A,SREBF1,NR1D1,STARD4,ABHD6,PDGFA,SLC45A3,BMP2,ATG7,APOA5,LDLR,FGF1,BMP6,SERPINA12,INSIG1,DHCR7,FDPS,MUP11,MUP18,MUP16,MUP9,MUP12
hepaticobiliary system development	0.00179	157	993	23	14.6	BP	SP1,SRSF1,ARG1,STAT5B,PLAU,CLDN1,RELA,RPS24,SP3,ASNS,ATG7,SMARCA4,CEBPA,RPS16,PTPN3,CITED2,PCSK9,NPM1,RPL32,DBP,RAP1A,MPST,HMGCS1
ribosomal subunit	0.000176	207	993	29	14	CC	RPS11,RPS9,RPS18,RPS5,RPS14,RPS24,RPS20,RPL22,RBM3,RPS29,RPS16,RPL10A,FAU,RPL12,RPL22L1,MRPS27,RPL9,RPS8,RPS23,RPS27RT,NPM1,RPL32,RPS7,RPL35,RPS28,RPL13A,RPL39,RPS27,RPL41
small molecule biosynthetic process	2.01e-16	638	993	86	13.5	BP	KAT2B,SRR,CYP51,POR,ELOVL1,MVD,MID1IP1,PDK4,CRY1,AVPR1A,SREBF1,GALK1,NR1D1,ACLY,FDFT1,HMGCR,DHFR,PPARA,CYP39A1,CBS,STARD4,IMPA2,FADS3,RBP4,GSTO1,FASN,AGXT,SLC45A3,ATF3,HSD17B7,KYNU,HSD17B12,GATM,SORD,ITPKA,BMP2,SLC27A2,AHCY,PMVK,CTH,VCP,GALE,SESN2,PGD,MTHFR,UGDH,MTHFD2L,PRKAB1,MMAB,ASNS,SLC27A5,ACER3,OAT,NSDHL,NUDT7,SC5D,APOA5,LSS,FGF1,DECR2,AKR1D1,BMP6,SERPINA12,GCK,MVK,ACACB,DCTPP1,FADS6,INSIG1…
cellular carbohydrate metabolic process	1.32e-05	267	993	36	13.5	BP	KAT2B,HSD11B1,PDK4,IGFBP3,GALK1,NR1D1,PPARA,SYNJ2,TFF3,PCDH12,IMPA2,IGFBP5,SLC45A3,SORD,ITPKA,RORC,SESN2,PGD,ABCG2,IDH2,LCMT1,TREH,SERPINA12,GCK,ACACB,PRKCE,LEPR,PTK2B,TRP53,MUP11,MLYCD,G6PC,MUP18,MUP16,MUP9,MUP12
tetrapyrrole binding	0.00279	185	993	25	13.5	MF	CYP51,CYP17A1,PXDN,NR1D1,CYC1,HRG,CYP39A1,CBS,CYP2U1,CYP4A31,CYP4B1,MMAB,CYP2B10,CYB5B,CYP2C37,CYP2C50,CYP3A11,CYP2D22,CYP4A32,CYP4A12A,CYP2C54,CYP2D40,CYP2C68,CYP4A12B,CYP2D10
cofactor metabolic process	5.32e-11	464	993	62	13.4	BP	CS,ELOVL1,MVD,HSD11B1,PDK4,VNN3,NAMPT,PXDN,GALK1,ACLY,STAT5B,ACOT12,HMGCR,DHFR,NADK2,PPARA,EHHADH,GSTO1,FASN,TALDO1,MPC2,KYNU,AHCY,GSTM4,PMVK,GCLM,CTH,VCP,GALE,PGD,MTHFR,MTHFD2L,MMAB,AHCYL2,NAT8,IDH2,QPRT,NUDT7,IREB2,GSTA4,NMNAT3,GSTT2,ACOT11,RSAD1,FMO2,FMO1,GGT6,GCK,MVK,ACACB,ACOT4,MAT2A,CES1D,TRP53,GLYAT,MOCS1,ETHE1,MTHFS,ACNAT1,ACOT1,GGH,MLYCD
circadian rhythm	0.000845	210	993	28	13.3	BP	CRY1,SREBF1,NAMPT,NR1D1,ID4,PPARA,AHCY,NTRK1,RORC,CLOCK,ALB,BHLHE41,CIART,ARNTL2,ADORA1,MAT2A,ARNTL,NTRK2,NFIL3,LEPR,TRP53,DBP,JUND,MUP11,MUP18,MUP16,MUP9,MUP12
cellular response to peptide	0.0285	321	993	33	10.3	BP	KAT2B,SP1,POR,CAV1,RARRES2,PDK4,SGK1,ARG1,SREBF1,STAT5B,GPLD1,RANGAP1,APP,RELA,BAIAP2,CPEB1,EPRS,NR4A2,ZBTB7B,SLC25A33,PIK3R1,SERPINA12,GCK,SHC1,PCSK9,GJB2,CFL1,TRP53,MUP11,MUP18,MUP16,MUP9,MUP12
cellular response to peptide hormone stimulus	0.0101	278	993	31	11.2	BP	KAT2B,SP1,POR,CAV1,RARRES2,PDK4,SGK1,ARG1,SREBF1,STAT5B,GPLD1,RANGAP1,RELA,BAIAP2,CPEB1,EPRS,NR4A2,ZBTB7B,SLC25A33,PIK3R1,SERPINA12,GCK,SHC1,PCSK9,GJB2,CFL1,MUP11,MUP18,MUP16,MUP9,MUP12
lipid homeostasis	0.00177	123	993	20	16.3	BP	ANGPTL4,CAV1,ABCA1,NR1D1,SREBF2,GPIHBP1,ABCA2,SESN2,ATG7,APOA5,LDLR,CEBPA,MYLIP,ASGR2,GCK,ADORA1,ABCB4,PCSK9,INSIG1,G6PC
oxidoreductase activity, acting on paired donors, with incorporation or reduction of molecular oxygen	0.00175	205	993	27	13.2	MF	CYP51,CYP17A1,POR,CMAH,SQLE,CYP39A1,CYP2U1,CYP4A31,CYP4B1,CYP2B10,PDILT,MSMO1,SC5D,FMO2,FMO1,CYP2C37,AGMO,CYP2C50,CYP3A11,CYP2D22,CYP4A32,CYP4A12A,CYP2C54,CYP2D40,CYP2C68,CYP4A12B,CYP2D10
alpha-amino acid metabolic process	0.0283	197	993	24	12.2	BP	SRR,GCAT,ARG1,STAT5B,CBS,AGXT,SCLY,KYNU,GATM,AHCY,GCLM,CTH,MTHFR,MTHFD2L,ASNS,AHCYL2,NOX4,OAT,NMNAT3,CYP2D22,GLYAT,GM5096,MPST,BHMT
carbohydrate homeostasis	0.00912	263	993	30	11.4	BP	PRKACA,GPRC5B,PDK4,CRY1,NR1D1,HMGCR,RBP4,MAP4K4,IGFBP5,MPC2,GCLM,SESN2,ATG7,NOX4,STX4A,SMARCA4,CEBPA,PIK3R1,GCK,PRKCE,LEPR,LGALS1,RAP1A,MUP11,G6PC,MUP18,MUP16,MUP9,FCOR,MUP12
cellular response to extracellular stimulus	0.0293	251	993	28	11.2	BP	ANGPTL4,PDK4,AVPR1A,SREBF1,NCOA1,FOS,SREBF2,PIM1,EIF2AK2,BAIAP2,RPTOR,ATF3,NR4A2,SESN2,ALB,ASNS,ATG7,MAP1LC3B,KANK2,IREB2,BMP6,GCK,DCTPP1,ZC3H12A,PCSK9,TRP53,FCOR,MUP12
regulation of small molecule metabolic process	1.77e-06	321	993	42	13.1	BP	KAT2B,POR,CAV1,MID1IP1,PLIN5,HSD11B1,PDK4,AVPR1A,IGFBP3,SREBF1,NR1D1,PPARA,TFF3,STARD4,IGFBP5,SLC45A3,BMP2,RORC,VCP,SESN2,SLC25A33,LCMT1,APOA5,LDLR,FGF1,BMP6,SERPINA12,GCK,ACACB,PRKCE,INSIG1,LEPR,DHCR7,PTK2B,TRP53,FDPS,MUP11,MLYCD,MUP18,MUP16,MUP9,MUP12
cellular glucose homeostasis	0.0206	168	993	22	13.1	BP	PRKACA,NR1D1,HMGCR,MAP4K4,MPC2,GCLM,ATG7,NOX4,STX4A,SMARCA4,PIK3R1,GCK,PRKCE,LEPR,LGALS1,RAP1A,MUP11,MUP18,MUP16,MUP9,FCOR,MUP12
rhythmic process	0.00377	306	993	34	11.1	BP	KAT2B,SP1,CRY1,SREBF1,NAMPT,NCOA1,NR1D1,STAT5B,ID4,PPARA,AHCY,SCHIP1,NTRK1,RORC,CLOCK,ALB,BHLHE41,ETS1,CIART,ARNTL2,ADORA1,MAT2A,ARNTL,NTRK2,NFIL3,LEPR,TRP53,DBP,JUND,MUP11,MUP18,MUP16,MUP9,MUP12
response to molecule of bacterial origin	0.0456	343	993	34	9.9	BP	LGALS9,SRR,ABCA1,MAPKAPK2,ARG1,TNIP1,NR1D1,STAT5B,FOS,CLDN1,EIF2AK2,RELA,CPEB1,MRC1,PDE4B,CASP9,ABCG2,LTBR,TNFRSF1A,NFKBIB,TRIB1,SERPINE1,BMP6,FMO1,ZC3H12A,PRKCE,GJB2,PRKCA,CX3CR1,CEBPE,JUNB,CNR2,JUND,RPL13A
mitochondrion organization	0.0164	460	993	43	9.3	BP	PHB2,LETM1,TOMM40L,BIK,SLC22A5,HSPA4,SREBF1,TERT,BNIP3L,NDUFB9,TYMP,SYNJ2,ATG2A,NDUFB8,MFF,LMNA,GCLM,SESN2,SLC25A33,SLC35F6,ATG7,MYH14,MAP1LC3B,DNM2,CEBPA,COX18,INF2,APOPT1,NDUFB10,TIMM8A1,2410015M20RIK,OPA3,IMMP2L,TRP53,NDUFB6,MUP11,BNIP3,MUP18,MUP16,MUP9,TOMM5,TMEM102,MUP12
translation	0.000844	619	993	57	9.2	BP	RPS11,CALR,RPS9,RPS18,RPS5,MKNK2,BTG2,MIF4GD,DHFR,EIF4A2,APP,EIF2AK2,RPS14,RPS24,PAIP1,CPEB1,IGFBP5,FARSB,EPRS,RPS20,SESN2,RPL22,RBM3,AARS,IREB2,EEFSEC,RPS29,EIF1,RPS16,RPL10A,FAU,RPL12,RPL22L1,THBS1,MRPS27,MVK,ZC3H12A,NGRN,RPL9,RPS8,RPS23,RPS27RT,BCL3,NPM1,PUS7,RPL32,PTK2B,RPS7,RPS12,RPL35,NCK2,RPS28,SARS2,RPL13A,RPL39,RPS27,RPL41
regulation of defense response	0.047	543	993	47	8.7	BP	LGALS9,DDT,CAV1,GPRC5B,MAPKAPK2,DHX58,ARG1,TNIP1,NR1D1,STAT5B,TRAF3,PPARA,APP,RELA,XRCC5,CD55,NMI,TRIM44,ZBP1,ADAR,CLOCK,ZC3HAV1,CLEC2D,TNFRSF1A,SLC7A2,CDH5,ETS1,LDLR,TAP1,SERPINE1,TGM2,METRNL,DDX58,MVK,ADORA1,ZC3H12A,CTLA2A,PRKCE,IRGM1,HEXIM1,VAMP8,CX3CR1,RAET1E,S100A8,TRIM12C,CALCRL,CNR2
cellular ketone metabolic process	0.0362	174	993	22	12.6	BP	CYP17A1,CAV1,MID1IP1,KDSR,PLIN5,PDK4,AVPR1A,SREBF1,NR1D1,STAT5B,HMGCR,PPARA,STARD4,SLC45A3,KYNU,BMP2,APOA5,BMP6,ACACB,PRKCE,INSIG1,MLYCD
small molecule catabolic process	4.49e-05	305	993	38	12.5	BP	LIPE,GCAT,PLIN5,ARG1,GALK1,ECI2,ACOX2,HACL1,EHHADH,SYNJ2,ACAT2,CYP39A1,CBS,IMPA2,ALDH1A7,ACADL,AGXT,SCLY,KYNU,SORD,SLC27A2,LPIN3,AHCY,GALE,CYP4A31,SESN2,SULT1B1,QPRT,ETFA,ALDH1B1,GALT,AKR1D1,ACACB,ACOT4,CES1D,TRP53,CYP4A32,MLYCD
response to acid chemical	1.58e-05	345	993	42	12.2	BP	PHB2,AQP1,ABCA1,PDK4,LRP11,ARG1,AVPR1A,SREBF1,NCOA1,DHFR,CLDN1,CBS,RELA,RBP4,BAIAP2,RPTOR,CPEB1,XRCC5,CRLS1,PDGFC,NTRK1,GCLM,SESN2,MTHFR,ASNS,ABCG2,ATG7,HSD17B2,LDLR,CTSH,LEFTY1,BMP6,IGFBP2,ABCB4,ZC3H12A,PRKCE,GJB2,KRT8,NTRK2,CFL1,PTK2B,TRP53
organic acid metabolic process	5.27e-18	935	993	112	12	BP	SCPEP1,SRR,LIPE,POR,CS,GCAT,ELOVL1,CAV1,MID1IP1,PLIN5,ST3GAL1,CMAH,PDK4,ARG1,VNN3,AVPR1A,SREBF1,GALK1,NR1D1,ACLY,STAT5B,SLC17A1,ECI2,ACOT12,DHFR,ACOX2,HACL1,PPARA,EHHADH,ACAT2,CYP39A1,PIM1,CBS,STARD4,FADS3,LIPA,GSTO1,FASN,ACADL,FARSB,AGXT,SCLY,SLC45A3,MPC2,EPRS,KYNU,HSD17B12,GATM,SLC27A2,LPIN3,AHCY,GCLM,CTH,GALE,CYP4A31,SESN2,PGD,MTHFR,UGDH,SULT1B1,MTHFD2L,PRKAB1,ASNS,AHCYL2,ABCG2,TNFRSF1A,SLC27A…
response to endogenous stimulus	7.92e-08	1530	993	126	8.2	BP	KAT2B,SP1,DAXX,CALR,PHB2,AQP1,PRKACA,POR,NR1I3,CAV1,BMP7,RARRES2,WNT2,FUZ,ABCA1,STEAP2,PDK4,SGK1,ARG1,CRY1,AVPR1A,BTG2,SREBF1,NCOA1,NR1D1,STAT5B,FOS,GPLD1,PPARA,RANGAP1,TAB1,SREBF2,CLDN1,CYC1,NR1I2,APP,RELA,RBP4,CPN1,BAIAP2,RPTOR,CPEB1,IGFBP5,AGXT,EPRS,NR4A2,ABCA2,LRP2,GATM,SORD,CRLS1,BMP2,PDGFC,ZBTB7B,NTRK1,GCLM,RORC,PDE4B,SESN2,CASP9,SLC25A33,CLOCK,ACTB,ASNS,ABCG2,ATG7,NOX4,AQP8,FGFR1,BBS2,CDH5…
cellular response to chemical stimulus	8.31e-12	2759	993	211	7.6	BP	KAT2B,SP1,DDT,IL16,SMO,DAXX,MCM2,CALR,PHB2,AQP1,NDRG1,PRKACA,POR,NR1I3,CAV1,BMP7,RARRES2,WNT2,FUZ,SLC41A1,DNAJB9,ABCA1,MAPKAPK2,PELP1,PDK4,SGK1,ARG1,CRY1,AVPR1A,MKNK2,NFYB,TNIP1,SREBF1,NCOA1,PXDN,NR1D1,STAT5B,FOS,TRAF3,GPLD1,AAED1,TERT,XRCC4,OCLN,HMGCR,DHFR,BNIP3L,PPARA,RANGAP1,TAB1,CLDN1,IL1RAP,ST3GAL6,NR1I2,HRG,EIF4A2,APP,KRT18,PIM1,CBS,EIF2AK2,RELA,GSTO1,FASN,BAIAP2,RPTOR,CPEB1,ADAM23,SLC40A1,…
small molecule metabolic process	1.87e-35	1750	993	206	11.8	BP	SCPEP1,KAT2B,SRR,CYP51,LIPE,CYP17A1,AQP1,POR,CS,GCAT,ELOVL1,MVD,CAV1,MID1IP1,KDSR,PLIN5,ST3GAL1,SLC25A13,ABCA1,CLPX,HSD11B1,CMAH,ATP5G3,ATP6V0A1,PDK4,ARG1,VNN3,CRY1,AVPR1A,IGFBP3,SREBF1,NAMPT,GALK1,NR1D1,ACLY,STAT5B,FDFT1,SLC17A1,ECI2,ACOT12,HMGCR,DHFR,ACOX2,HACL1,RNASEH2B,NADK2,SQLE,NDUFB9,PPARA,SREBF2,CYC1,TYMP,PMM2,EHHADH,APP,SYNJ2,ACAT2,CYP39A1,PIM1,TFF3,CBS,STARD4,IMPA2,FADS3,ALDH1A7,LIPA,RB…
cofactor binding	2.24e-09	570	993	67	11.8	MF	SRR,CYP51,CYP17A1,POR,GCAT,HSD11B1,CMAH,SGK1,PXDN,NR1D1,ACLY,ECI2,HMGCR,DHFR,ACOX2,HACL1,SQLE,CYC1,HRG,CYP39A1,CBS,FASN,SIRT3,ACADL,AGXT,KYNU,SORD,AHCY,GSTM4,CYP2U1,CTH,CYP4A31,CYP4B1,PGD,MTHFR,UGDH,ALB,MMAB,ASNS,CYP2B10,IDH2,OAT,DUS2,CYB5B,IREB2,ETFA,GSTA4,UQCRFS1,RSAD1,FMO2,FMO1,PNPLA3,ACACB,CYP2C37,CYP2C50,CYP3A11,DHCR7,CYP2D22,CYP4A32,MOCS1,AOX3,CYP4A12A,CYP2C54,CYP2D40,CYP2C68,CYP4A12B,CYP2D…
response to abiotic stimulus	0.0248	1113	993	82	7.4	BP	ANGPTL4,DAXX,PHB2,AQP1,NDRG1,PRKACA,CAV1,LRP11,SGK1,CRY1,AVPR1A,BTG2,FOS,GPLD1,TERT,XRCC4,HMGCR,PLAU,BNIP3L,PPARA,CLDN1,ARSA,APP,CBS,RELA,RBP4,CPEB1,RHBDD1,XRCC5,NR4A2,LRP2,SORD,BMP2,LMNA,NTRK1,CASP9,MTHFR,CLOCK,TFEC,ACTB,GNGT1,ASNS,ATG7,LTBR,TNFRSF1A,NOX4,RBM3,RASA3,ETS1,IREB2,DNM2,INO80,GNAT1,ACOT11,REEP6,GADD45A,FGF1,TXNIP,BMP6,METRNL,IGFBP2,CITED2,THBS1,FMO1,ABCB1A,PIK3R1,ADORA1,PRKCE,KRT8,JU…
lipid localization	1.08e-05	380	993	45	11.8	BP	CAV1,PLIN5,ABCA1,CRY1,IGFBP3,STAT5B,PPARA,SREBF2,GPIHBP1,SLC10A2,ACAT2,STARD4,RBP4,EPRS,ABCA2,ABCB11,SLC27A2,ATP9A,SLCO1A4,SLC27A5,AQP8,ATP11A,APOA5,LDLR,SLCO2A1,SIGMAR1,ATP11B,BMP6,ATP8B1,THBS1,ABCB1A,ABCA8A,ACACB,IKBKE,ABCB4,ZC3H12A,PCSK9,PLA2R1,APOL9A,ATP8B4,MUP11,MUP18,MUP16,MUP9,MUP12
drug metabolic process	1.59e-10	645	993	75	11.6	BP	SP1,SRR,CYP17A1,POR,CS,GCAT,CAV1,ST3GAL1,SLC25A13,CLPX,CMAH,ATP5G3,ATP6V0A1,PXDN,GALK1,ACLY,STAT5B,DHFR,NDUFB9,PPARA,CYC1,NR1I2,CBS,ALDH1A7,CPN1,NDUFB8,PAOX,ATP5C1,AGXT,NR4A2,KYNU,GATM,BMP2,AHCY,CTH,VCP,GALE,CYP4B1,SLC25A33,MTHFR,SULT1B1,DCK,MMAB,ASNS,AHCYL2,SLC27A5,IDH2,QPRT,OAT,SLC7A2,CTSH,ACPP,DNM2,ALDH1B1,ATP5L,FMO2,FMO1,GCK,ZC3H12A,ATP5K,COA6,CX3CR1,MAT2A,IDE,PTK2B,TRP53,CYP2D22,GLYAT,UQCRH,…
liver development	0.00127	154	993	23	14.9	BP	SP1,SRSF1,ARG1,STAT5B,PLAU,CLDN1,RELA,RPS24,SP3,ASNS,ATG7,SMARCA4,CEBPA,RPS16,PTPN3,CITED2,PCSK9,NPM1,RPL32,DBP,RAP1A,MPST,HMGCS1
response to external stimulus	1.64e-05	2341	993	164	7	BP	LGALS9,SRR,DDT,IL16,SMO,ANGPTL4,CALR,AQP1,POR,CAV1,GPRC5B,BMP7,RARRES2,ABCA1,MAPKAPK2,DHX58,PDK4,LRP11,ARG1,CRY1,AVPR1A,TNIP1,BTG2,SREBF1,NCOA1,NR1D1,STAT5B,FOS,TRAF3,HMGCR,PLAU,BNIP3L,PPARA,SREBF2,CLDN1,PLEC,TYMP,ARSA,HRG,APP,PIM1,CBS,EIF2AK2,RELA,RBP4,DNTT,PTPRJ,BAIAP2,RPTOR,CPEB1,PDGFA,CD55,NFASC,ATF3,MRC1,NR4A2,KYNU,TRIM44,GATM,SORD,ZBP1,CAR3,AHCY,ADAR,EFNA3,SEMA4A,NTRK1,GCLM,EPHA7,PDE4B,SESN…
regulation of cell proliferation	0.00498	1665	993	116	7	BP	KAT2B,LGALS9,SP1,SMO,NACC1,CALR,PHB2,AQP1,NDRG1,PRKACA,POR,RPS9,MVD,CAV1,BMP7,WNT2,FUZ,RPA3,ATRAID,SGK2,ARG1,AVPR1A,BTG2,IGFBP3,NAMPT,TMIGD1,NR1D1,STAT5B,GPLD1,ID4,TERT,HMGCR,PLAU,RNASEH2B,TSC22D1,HRG,APP,PIM1,EIF2AK2,OVOL1,RELA,RBP4,PTPRJ,RPTOR,CPEB1,PDGFA,IGFBP5,XRCC5,ATF3,FAM129B,LRP2,BMP2,S100A11,PDGFC,ZBTB7B,LMNA,NTRK1,CTH,CDKN2C,SLC25A33,SLC35F6,CNBP,LTBR,TNFRSF1A,IDH2,NOX4,ACER3,STX4A,FGFR…
regulation of biological quality	2.06e-08	3444	993	236	6.9	BP	SCPEP1,KAT2B,SNAPIN,LGALS9,SP1,SMO,ANGPTL4,CYP17A1,CALR,PHB2,AQP1,LETM1,PRKACA,POR,FBLIM1,RPS9,GCAT,CAV1,CLSTN3,CARHSP1,GPRC5B,OIT3,PLIN5,RPS5,SLC41A1,ABCA1,STEAP2,HSD11B1,MAPKAPK2,EXOSC10,SLC22A5,ATP6V0A1,PDK4,SGK1,CRY1,MICU1,AVPR1A,1810043G02RIK,IGFBP3,SREBF1,NCOA1,PECAM1,TEN1,TMIGD1,NR1D1,STAT5B,TERT,HMGCR,PLAU,CHRNA2,BNIP3L,PPARA,RANGAP1,MYH9,SREBF2,CLDN1,IL1RAP,GPIHBP1,HRG,APP,PARP3,CBS,STAR…
glucose homeostasis	0.00844	262	993	30	11.5	BP	PRKACA,GPRC5B,PDK4,CRY1,NR1D1,HMGCR,RBP4,MAP4K4,IGFBP5,MPC2,GCLM,SESN2,ATG7,NOX4,STX4A,SMARCA4,CEBPA,PIK3R1,GCK,PRKCE,LEPR,LGALS1,RAP1A,MUP11,G6PC,MUP18,MUP16,MUP9,FCOR,MUP12
protein-containing complex assembly	0.00937	1669	993	115	6.9	BP	SRR,NACC1,PSMC3,ANGPTL4,DAXX,IKZF4,MCM2,CALR,LETM1,FBLIM1,PPP2R1A,CAV1,MID1IP1,MLKL,ABCA1,BIK,SRSF1,ATP6V0A1,SGK1,ARG1,MICU1,CABIN1,HSPA4,PSMC5,PECAM1,HMGCR,HACL1,CHRNA2,C9,NDUFB9,CLDN1,HRG,APP,EIF2AK2,RPS14,CUTC,NDUFB8,BAIAP2,TK1,ACADL,FARSB,AHCTF1,APCS,TOR1B,TOR1A,ADAR,PDGFC,CTH,VCP,SLC25A33,PRKAB1,TMCC1,TNFRSF1A,PSMC4,QPRT,KCTD13,LCMT1,PARVA,STX4A,DNHD1,ANKS4B,OAT,VBP1,BIRC3,APOA5,SMARCA4,ACPP…
lipid metabolic process	3.47e-20	1216	993	137	11.3	BP	SCPEP1,CYP51,ANGPTL4,LIPE,CYP17A1,POR,ELOVL1,MVD,CAV1,MID1IP1,RARRES2,KDSR,PLIN5,ABCA1,HSD11B1,PDK4,AVPR1A,SREBF1,NR1D1,ACLY,STAT5B,FDFT1,GPLD1,ECI2,ACOT12,HMGCR,ACOX2,HACL1,SQLE,PPARA,SREBF2,ST3GAL6,EHHADH,APP,SERINC2,PIGX,SYNJ2,ACAT2,CYP39A1,STARD4,IMPA2,FADS3,LIPA,RBP4,FASN,PI4K2A,ABHD6,PDGFA,ACADL,SLC45A3,HSD17B7,HSD17B12,CRLS1,BMP2,SLC27A2,LPIN3,SCHIP1,PMVK,RORC,CYP4A31,SESN2,FAM126A,SULT1B1…
response to peptide hormone	3.17e-05	407	993	46	11.3	BP	KAT2B,SP1,POR,CAV1,BMP7,RARRES2,PDK4,SGK1,ARG1,CRY1,BTG2,SREBF1,STAT5B,GPLD1,PPARA,RANGAP1,CYC1,RELA,RBP4,BAIAP2,CPEB1,IGFBP5,EPRS,NR4A2,GATM,ZBTB7B,SESN2,SLC25A33,ABCG2,BTG1,PIK3R1,SERPINA12,GCK,SHC1,PCSK9,GJB2,CFL1,CXCL12,SORT1,JUND,MUP11,GGH,MUP18,MUP16,MUP9,MUP12
coenzyme binding	0.00499	296	993	33	11.1	MF	SRR,POR,GCAT,HSD11B1,ECI2,HMGCR,DHFR,ACOX2,HACL1,SQLE,CBS,FASN,SIRT3,ACADL,AGXT,KYNU,SORD,AHCY,CTH,PGD,MTHFR,UGDH,ALB,IDH2,OAT,DUS2,ETFA,FMO2,FMO1,PNPLA3,ACACB,DHCR7,AOX3
response to carbohydrate	0.0455	257	993	28	10.9	BP	PRKACA,SREBF1,NR1D1,GPLD1,HMGCR,MAP4K4,MPC2,GCLM,SESN2,ATG7,NOX4,STX4A,SMARCA4,TXNIP,THBS1,GCK,PRKCE,LEPR,PTK2B,CALCRL,ACVR2B,LGALS1,RAP1A,MUP11,MUP18,MUP16,MUP9,MUP12
oxidation-reduction process	4.67e-15	1063	993	115	10.8	BP	NARF,CYP51,CYP17A1,PRKACA,POR,CS,KDSR,PLIN5,GFOD2,SLC25A13,STEAP2,HSD11B1,CMAH,PDK4,CYB561,RTN4IP1,PXDN,DHRS13,NR1D1,DHRS7,ECI2,AAED1,HMGCR,DHFR,ACOX2,HACL1,SQLE,NDUFB9,PPARA,CYC1,EHHADH,ACAT2,CYP39A1,CBS,PCDH12,FADS3,ALDH1A7,GSTO1,FASN,NDUFB8,PAOX,SIRT3,ACADL,HSD17B7,HSD17B12,SORD,BMP2,SLC27A2,CYP2U1,VCP,GPX7,CYP4A31,CYP4B1,SESN2,PGD,MTHFR,UGDH,HSD17B11,MTHFD2L,CYP2B10,IDH2,NOX4,NSDHL,MSMO1,HSD1…
cellular response to external stimulus	0.00958	319	993	34	10.7	BP	ANGPTL4,AQP1,CAV1,PDK4,AVPR1A,SREBF1,NCOA1,FOS,SREBF2,PIM1,EIF2AK2,BAIAP2,RPTOR,ATF3,NR4A2,SESN2,ALB,ASNS,ATG7,LTBR,TNFRSF1A,MAP1LC3B,KANK2,IREB2,GADD45A,BMP6,GCK,DCTPP1,ZC3H12A,PCSK9,TRP53,BNIP3,FCOR,MUP12
active transmembrane transporter activity	0.00329	360	993	38	10.6	MF	LETM1,ATP4A,SLC5A6,SLC41A1,ABCA1,ATP5G3,SLC22A5,SLC25A22,ATP6V0A1,SLC16A7,SLC1A4,SLC36A1,SLC17A1,SLC10A2,SLC23A1,ATP5C1,SLC45A3,ABCA2,ABCB11,SLC20A1,ATP6V0D2,ABCB1B,ABCB8,ABCG2,SLCO1A4,SLCO2A1,SLC25A20,SLC17A2,TAP1,ATP5L,SLC7A5,ABCB1A,ABCA8A,ABCB4,SLC15A5,SLC22A26,GM6614,SLC6A16
aging	0.011	321	993	34	10.6	BP	SRR,CALR,CAV1,ARG1,SREBF1,FOS,TERT,HMGCR,CLDN1,APP,RELA,IGFBP5,LMNA,NTRK1,GCLM,CASP9,ABCG2,ATG7,NOX4,PPP1R9A,SERPINE1,CDKN1C,IGFBP2,CITED2,SHC1,GJB2,PLA2R1,ARNTL,IDE,NPM1,TRP53,ING2,JUND,NUP62
cellular lipid metabolic process	2.44e-11	913	993	96	10.5	BP	SCPEP1,LIPE,POR,ELOVL1,MVD,CAV1,MID1IP1,RARRES2,KDSR,PLIN5,PDK4,AVPR1A,SREBF1,ACLY,STAT5B,FDFT1,GPLD1,ECI2,ACOT12,HMGCR,ACOX2,HACL1,PPARA,ST3GAL6,EHHADH,SERINC2,PIGX,SYNJ2,ACAT2,STARD4,IMPA2,FADS3,LIPA,RBP4,FASN,PI4K2A,ABHD6,PDGFA,ACADL,SLC45A3,HSD17B12,CRLS1,SLC27A2,LPIN3,PMVK,CYP4A31,SESN2,FAM126A,PRKAB1,ATG7,TNFRSF1A,SLC27A5,CDIPT,ACER3,ST3GAL4,APOA5,LDLR,ETFA,GDE1,ACOT11,DECR2,PIK3R1,SERPINA1…
oxidoreductase activity	1.04e-09	810	993	85	10.5	MF	NARF,CYP51,CYP17A1,POR,KDSR,GFOD2,STEAP2,HSD11B1,CMAH,CYB561,RTN4IP1,PXDN,DHRS13,DHRS7,HMGCR,DHFR,ACOX2,SQLE,CYC1,EHHADH,CYP39A1,CBS,FADS3,ALDH1A7,GSTO1,FASN,NDUFB8,PAOX,ACADL,HSD17B7,HSD17B12,SORD,BMP2,CYP2U1,GPX7,CYP4A31,CYP4B1,SESN2,PGD,MTHFR,UGDH,HSD17B11,MTHFD2L,CYP2B10,IDH2,NOX4,PDILT,NSDHL,MSMO1,HSD17B2,DUS2,SC5D,ETFA,SRXN1,GSTT2,DIO1,ALDH1B1,DECR2,UQCRFS1,AKR1D1,RSAD1,FMO2,FMO1,CYP2C37,FA…
alcohol metabolic process	2.25e-13	282	993	50	17.7	BP	CYP51,LIPE,POR,MVD,ABCA1,SREBF1,GALK1,FDFT1,HMGCR,DHFR,SQLE,SREBF2,APP,SYNJ2,CYP39A1,IMPA2,ALDH1A7,RBP4,HSD17B7,SORD,ITPKA,BMP2,PMVK,SULT1B1,ACER3,NSDHL,FGFR1,SC5D,APOA5,LDLR,LSS,GDE1,CEBPA,ALDH1B1,FGF1,AKR1D1,BMP6,SERPINA12,MVK,ADRBK2,PCSK9,INSIG1,RETSAT,CES1D,LEPR,DHCR7,PTK2B,FDPS,RDH11,HMGCS1
secondary alcohol metabolic process	6.92e-14	113	993	32	28.3	BP	CYP51,LIPE,POR,MVD,ABCA1,SREBF1,FDFT1,HMGCR,SQLE,SREBF2,APP,CYP39A1,HSD17B7,PMVK,NSDHL,FGFR1,SC5D,APOA5,LDLR,LSS,CEBPA,FGF1,AKR1D1,SERPINA12,MVK,PCSK9,INSIG1,CES1D,LEPR,DHCR7,FDPS,HMGCS1
response to lipopolysaccharide	0.0165	327	993	34	10.4	BP	LGALS9,SRR,ABCA1,MAPKAPK2,ARG1,TNIP1,NR1D1,STAT5B,FOS,CLDN1,EIF2AK2,RELA,CPEB1,MRC1,PDE4B,CASP9,ABCG2,LTBR,TNFRSF1A,NFKBIB,TRIB1,SERPINE1,BMP6,FMO1,ZC3H12A,PRKCE,GJB2,PRKCA,CX3CR1,CEBPE,JUNB,CNR2,JUND,RPL13A
cellular response to hormone stimulus	1.04e-06	640	993	66	10.3	BP	KAT2B,SP1,DAXX,CALR,PHB2,AQP1,PRKACA,POR,NR1I3,CAV1,BMP7,RARRES2,PDK4,SGK1,ARG1,CRY1,AVPR1A,SREBF1,NCOA1,NR1D1,STAT5B,FOS,GPLD1,PPARA,RANGAP1,NR1I2,RELA,BAIAP2,CPEB1,EPRS,NR4A2,ZBTB7B,GCLM,RORC,CASP9,SLC25A33,CLOCK,ASNS,ABCG2,BBS2,SMARCA4,KANK2,CTSH,UBE2L3,IGFBP2,PIK3R1,SERPINA12,GCK,SHC1,PCSK9,PRKCE,GJB2,JUNB,ARNTL,NTRK2,CFL1,NPM1,LEPR,RPL32,JUND,MUP11,MUP18,MUP16,MUP9,HMGCS1,MUP12
organic hydroxy compound biosynthetic process	3.76e-10	207	993	38	18.4	BP	CYP51,DDT,POR,MVD,SREBF1,NR1D1,FDFT1,HMGCR,DHFR,SQLE,CYP39A1,STARD4,IMPA2,HSD17B7,NR4A2,ITPKA,BMP2,SLC27A2,PMVK,SLC27A5,ACER3,NSDHL,MSMO1,SC5D,APOA5,LSS,FGF1,AKR1D1,BMP6,MVK,INSIG1,CES1D,DHCR7,PTK2B,TRP53,FDPS,CYP2D22,HMGCS1
alcohol biosynthetic process	1.03e-07	123	993	26	21.1	BP	CYP51,POR,MVD,SREBF1,FDFT1,HMGCR,DHFR,IMPA2,HSD17B7,ITPKA,BMP2,PMVK,ACER3,NSDHL,SC5D,APOA5,LSS,FGF1,BMP6,MVK,INSIG1,CES1D,DHCR7,PTK2B,FDPS,HMGCS1
secondary alcohol biosynthetic process	3.19e-11	44	993	19	43.2	BP	CYP51,POR,MVD,SREBF1,FDFT1,HMGCR,HSD17B7,PMVK,NSDHL,SC5D,APOA5,LSS,FGF1,MVK,INSIG1,CES1D,DHCR7,FDPS,HMGCS1
response to extracellular stimulus	4.99e-05	526	993	54	10.3	BP	ANGPTL4,POR,BMP7,ABCA1,PDK4,LRP11,ARG1,AVPR1A,SREBF1,NCOA1,FOS,HMGCR,PPARA,SREBF2,PLEC,ARSA,PIM1,CBS,EIF2AK2,RELA,DNTT,BAIAP2,RPTOR,ATF3,NR4A2,KYNU,GATM,SORD,AHCY,NTRK1,GCLM,SESN2,MTHFR,ALB,ASNS,ABCG2,ATG7,BBS2,MAP1LC3B,LDLR,KANK2,IREB2,BMP6,IGFBP2,GCK,ACACB,DCTPP1,ZC3H12A,PCSK9,TRP53,G6PC,FCOR,HMGCS1,MUP12
organic cyclic compound biosynthetic process	0.000457	4212	993	255	6.1	BP	KAT2B,SP1,CYP51,DDT,IL16,SMO,NACC1,PSMC3,DAXX,HLTF,IKZF4,LIPE,CYP17A1,CALR,PHB2,AQP1,POR,NR1I3,ELOVL1,MVD,CAV1,CARHSP1,BMP7,DMAP1,WNT2,MED15,SLC25A13,HSD11B1,EXOSC10,MAFK,ATP5G3,PELP1,E2F2,ATP6V0A1,PDK4,CRY1,NFYB,TNIP1,BTG2,SREBF1,NAMPT,NCOA1,PSMC5,GALK1,TEN1,NR1D1,ACLY,STAT5B,FOS,FDFT1,TRAF3,ID4,WRNIP1,NSD1,TERT,HMGCR,DHFR,TSC22D1,NADK2,SQLE,PPARA,L3MBTL2,SREBF2,IL1RAP,CYC1,PMM2,NR1I2,EIF4A2,APP…
cellular response to lipid	1.57e-05	566	993	58	10.2	BP	SMO,DAXX,CALR,PHB2,AQP1,NR1I3,BMP7,ABCA1,PDK4,SGK1,ARG1,CRY1,TNIP1,SREBF1,NR1D1,GPLD1,PPARA,CLDN1,NR1I2,PIM1,RELA,CPEB1,XRCC5,MRC1,NR4A2,RORC,PDE4B,CASP9,CLOCK,ABCG2,NFKBIB,SMARCA4,LDLR,KANK2,TRIB1,SERPINE1,UBE2L3,BMP6,ABCB4,ZC3H12A,PRKCE,INSIG1,GJB2,PRKCA,CX3CR1,CEBPE,ARNTL,NTRK2,NPM1,GNAI1,RPL32,PTK2B,MUP11,MUP18,MUP16,MUP9,HMGCS1,MUP12
carbohydrate metabolic process	4.26e-05	538	993	55	10.2	BP	KAT2B,CS,SLC3A2,ST3GAL1,HSD11B1,PDK4,CRY1,IGFBP3,GALK1,NR1D1,PPARA,PMM2,ST3GAL6,SYNJ2,TFF3,PCDH12,IMPA2,RBP4,GSTO1,TALDO1,IGFBP5,SLC45A3,ATF3,SORD,ITPKA,RORC,NANS,ST3GAL3,GALE,SESN2,PGD,ABCG2,IDH2,PGM2L1,LCMT1,ST3GAL4,TREH,UGT2A3,GALT,PIK3R1,SERPINA12,GCK,ACACB,MGAT2,PRKCE,LEPR,PTK2B,TRP53,MUP11,MLYCD,G6PC,MUP18,MUP16,MUP9,MUP12
monosaccharide metabolic process	9.06e-07	254	993	37	14.6	BP	KAT2B,PDK4,CRY1,IGFBP3,GALK1,NR1D1,PPARA,PMM2,TFF3,RBP4,GSTO1,IGFBP5,SLC45A3,ATF3,SORD,RORC,GALE,SESN2,PGD,PGM2L1,LCMT1,UGT2A3,GALT,PIK3R1,SERPINA12,GCK,ACACB,PRKCE,LEPR,TRP53,MUP11,MLYCD,G6PC,MUP18,MUP16,MUP9,MUP12
hexose metabolic process	5.44e-06	223	993	33	14.8	BP	KAT2B,PDK4,CRY1,IGFBP3,GALK1,NR1D1,PPARA,PMM2,TFF3,RBP4,IGFBP5,SLC45A3,ATF3,SORD,RORC,GALE,SESN2,PGM2L1,LCMT1,GALT,PIK3R1,SERPINA12,GCK,ACACB,LEPR,TRP53,MUP11,MLYCD,G6PC,MUP18,MUP16,MUP9,MUP12
glucose metabolic process	7.82e-05	188	993	28	14.9	BP	KAT2B,PDK4,CRY1,IGFBP3,NR1D1,PPARA,TFF3,RBP4,IGFBP5,SLC45A3,ATF3,RORC,SESN2,PGM2L1,LCMT1,PIK3R1,SERPINA12,GCK,ACACB,LEPR,TRP53,MUP11,MLYCD,G6PC,MUP18,MUP16,MUP9,MUP12
carbohydrate biosynthetic process	0.0126	188	993	24	12.8	BP	KAT2B,CRY1,NR1D1,PPARA,IMPA2,RBP4,GSTO1,ATF3,SORD,NANS,SESN2,PGD,ST3GAL4,SERPINA12,GCK,MGAT2,LEPR,PTK2B,MUP11,G6PC,MUP18,MUP16,MUP9,MUP12
monosaccharide biosynthetic process	2.04e-05	86	993	19	22.1	BP	KAT2B,CRY1,NR1D1,PPARA,RBP4,GSTO1,ATF3,SORD,SESN2,PGD,SERPINA12,GCK,LEPR,MUP11,G6PC,MUP18,MUP16,MUP9,MUP12
hexose biosynthetic process	0.00023	80	993	17	21.2	BP	KAT2B,CRY1,NR1D1,PPARA,RBP4,ATF3,SORD,SESN2,SERPINA12,GCK,LEPR,MUP11,G6PC,MUP18,MUP16,MUP9,MUP12
gluconeogenesis	0.000765	77	993	16	20.8	BP	KAT2B,CRY1,NR1D1,PPARA,RBP4,ATF3,SESN2,SERPINA12,GCK,LEPR,MUP11,G6PC,MUP18,MUP16,MUP9,MUP12
regulation of carbohydrate metabolic process	0.000387	167	993	25	15	BP	KAT2B,HSD11B1,PDK4,IGFBP3,NR1D1,PPARA,TFF3,IGFBP5,SLC45A3,RORC,SESN2,LCMT1,SERPINA12,GCK,ACACB,PRKCE,LEPR,PTK2B,TRP53,MUP11,MLYCD,MUP18,MUP16,MUP9,MUP12
organelle inner membrane	0.00031	482	993	49	10.2	CC	SLC25A1,PHB2,LETM1,GCAT,SLC25A13,CLPX,ATP5G3,SLC25A22,PDK4,MICU1,SLC25A29,2010107E04RIK,SLC25A48,NDUFB9,CYC1,SLC25A45,NDUFB8,SIRT3,ATP5C1,MPC2,GATM,CRLS1,ABCB8,SLC25A33,MTHFD2L,IDH2,SLC25A15,CYB5B,SLC25A20,COX18,SIGMAR1,UQCRFS1,ATP5L,TIMM8B,NDUFB10,ABCA8A,DPY19L3,TIMM8A1,SLC25A47,2410015M20RIK,SLC25A44,ATP5K,IMMP2L,UQCRH,IFI27,NDUFB6,USMG5,MPST,COX7A1
steroid metabolic process	3.8e-16	263	993	52	19.8	BP	CYP51,LIPE,CYP17A1,POR,MVD,ABCA1,HSD11B1,SREBF1,NR1D1,STAT5B,FDFT1,HMGCR,SQLE,SREBF2,APP,CYP39A1,STARD4,LIPA,HSD17B7,HSD17B12,BMP2,SLC27A2,SCHIP1,PMVK,RORC,SULT1B1,HSD17B11,SLC27A5,NSDHL,FGFR1,MSMO1,HSD17B2,SC5D,APOA5,LDLR,LSS,CEBPA,FGF1,AKR1D1,BMP6,ATP8B1,SERPINA12,MVK,PCSK9,INSIG1,CES1D,LEPR,DHCR7,FDPS,CYP2D22,G6PC,HMGCS1
sterol metabolic process	3.34e-14	118	993	33	28	BP	CYP51,LIPE,POR,MVD,ABCA1,SREBF1,FDFT1,HMGCR,SQLE,SREBF2,APP,CYP39A1,LIPA,HSD17B7,PMVK,NSDHL,MSMO1,SC5D,APOA5,LDLR,LSS,CEBPA,FGF1,AKR1D1,SERPINA12,MVK,PCSK9,INSIG1,CES1D,LEPR,DHCR7,FDPS,HMGCS1
cholesterol metabolic process	1.91e-13	109	993	31	28.4	BP	CYP51,LIPE,POR,MVD,ABCA1,SREBF1,FDFT1,HMGCR,SQLE,SREBF2,APP,CYP39A1,HSD17B7,PMVK,NSDHL,SC5D,APOA5,LDLR,LSS,CEBPA,FGF1,AKR1D1,SERPINA12,MVK,PCSK9,INSIG1,CES1D,LEPR,DHCR7,FDPS,HMGCS1
lipid catabolic process	0.0028	275	993	32	11.6	BP	LIPE,RARRES2,PLIN5,HSD11B1,ECI2,ACOX2,HACL1,EHHADH,ACAT2,CYP39A1,LIPA,ABHD6,ACADL,SLC27A2,LPIN3,CYP4A31,SESN2,HSD17B11,PLBD2,APOA5,LDLR,ETFA,PNPLA7,AKR1D1,PNPLA3,ACACB,ADORA1,PRKCE,HCAR2,CES1D,CYP4A32,MLYCD
lipid biosynthetic process	5.49e-12	541	993	70	12.9	BP	CYP51,CYP17A1,POR,ELOVL1,MVD,MID1IP1,KDSR,PLIN5,HSD11B1,PDK4,AVPR1A,SREBF1,NR1D1,ACLY,FDFT1,HMGCR,SQLE,PIGX,CYP39A1,STARD4,FADS3,FASN,PI4K2A,ABHD6,PDGFA,SLC45A3,HSD17B7,HSD17B12,CRLS1,BMP2,SLC27A2,LPIN3,PMVK,HSD17B11,PRKAB1,ATG7,SLC27A5,CDIPT,ACER3,NSDHL,MSMO1,HSD17B2,SC5D,ST3GAL4,APOA5,LDLR,LSS,FGF1,DECR2,AKR1D1,BMP6,PIK3R1,SERPINA12,PNPLA3,MVK,ACACB,FADS6,INSIG1,AGMO,CES1D,DHCR7,FDPS,ETNK2,MUP1…
steroid biosynthetic process	1.4e-11	151	993	34	22.5	BP	CYP51,CYP17A1,POR,MVD,HSD11B1,SREBF1,NR1D1,FDFT1,HMGCR,SQLE,CYP39A1,STARD4,HSD17B7,HSD17B12,BMP2,SLC27A2,PMVK,HSD17B11,SLC27A5,NSDHL,MSMO1,HSD17B2,SC5D,APOA5,LSS,FGF1,AKR1D1,BMP6,MVK,INSIG1,CES1D,DHCR7,FDPS,HMGCS1
sterol biosynthetic process	2.51e-12	50	993	21	42	BP	CYP51,POR,MVD,SREBF1,FDFT1,HMGCR,SQLE,HSD17B7,PMVK,NSDHL,MSMO1,SC5D,APOA5,LSS,FGF1,MVK,INSIG1,CES1D,DHCR7,FDPS,HMGCS1
cholesterol biosynthetic process	1.89e-11	43	993	19	44.2	BP	CYP51,POR,MVD,SREBF1,FDFT1,HMGCR,HSD17B7,PMVK,NSDHL,SC5D,APOA5,LSS,FGF1,MVK,INSIG1,CES1D,DHCR7,FDPS,HMGCS1
regulation of lipid metabolic process	9.46e-07	327	993	43	13.1	BP	ANGPTL4,CYP17A1,POR,CAV1,MID1IP1,RARRES2,PLIN5,PDK4,AVPR1A,SREBF1,NR1D1,STAT5B,PPARA,STARD4,ABHD6,PDGFA,SLC45A3,BMP2,RORC,ATG7,APOA5,LDLR,FGF1,BMP6,PIK3R1,SERPINA12,ACACB,ADORA1,PRKCE,INSIG1,HCAR2,OPA3,FGFR3,CES1G,DHCR7,PTK2B,FDPS,MUP11,MLYCD,MUP18,MUP16,MUP9,MUP12
regulation of steroid metabolic process	0.0144	95	993	16	16.8	BP	CYP17A1,POR,SREBF1,NR1D1,STAT5B,STARD4,BMP2,RORC,APOA5,LDLR,FGF1,BMP6,SERPINA12,INSIG1,DHCR7,FDPS
regulation of hormone levels	0.000158	515	993	52	10.1	BP	SCPEP1,CYP17A1,AQP1,POR,HSD11B1,CRY1,IGFBP3,SREBF1,NR1D1,STAT5B,HMGCR,RBP4,CPN1,SIRT3,MAP4K4,MPC2,HSD17B7,FAM129B,LRP2,HSD17B12,BMP2,SCHIP1,CLOCK,SULT1B1,HSD17B11,ATG7,STX4A,SERPINA7,FGFR1,HSD17B2,DIO1,AKR1D1,BMP6,ABCB1A,GCK,ADORA1,PRKCE,HCAR2,VAMP8,ARNTL,RETSAT,IDE,LEPR,DHCR7,ACVR2B,CYP2D22,RDH11,MUP11,MUP18,MUP16,MUP9,MUP12
mitochondrial membrane	8.4e-06	629	993	63	10	CC	SLC25A1,PHB2,LETM1,TOMM40L,GCAT,SLC25A13,CLPX,BIK,ATP5G3,SLC25A22,PDK4,RTN4IP1,ARG1,MICU1,SLC25A29,2010107E04RIK,SLC25A48,BNIP3L,NDUFB9,CYC1,SYNJ2,SLC25A45,NDUFB8,SIRT3,ATP5C1,ACADL,MFF,MPC2,GATM,SORD,CRLS1,ABCB8,SLC25A33,MTHFD2L,IDH2,SLC25A15,CYB5B,SLC25A20,DNM2,COX18,PNPLA7,UQCRFS1,ATP5L,TIMM8B,NDUFB10,ABCA8A,IKBKE,NGRN,TIMM8A1,SLC25A47,2410015M20RIK,SLC25A44,ATP5K,CFL1,IMMP2L,UQCRH,MT-ND6,NDUF…
organonitrogen compound biosynthetic process	2.01e-07	1619	993	130	8	BP	SRR,RPS11,CALR,AQP1,RPS9,ELOVL1,RPS18,KDSR,RPS5,ST3GAL1,SLC25A13,ABCA1,ATP5G3,ATP6V0A1,PDK4,ARG1,MKNK2,TNIP1,BTG2,NAMPT,MIF4GD,GALK1,ACLY,STAT5B,DHFR,NADK2,PPARA,IL1RAP,CYC1,PMM2,ST3GAL6,EIF4A2,APP,PIGX,CBS,EIF2AK2,RPS14,RPS24,PAIP1,PAOX,CPEB1,ATP5C1,IGFBP5,FARSB,AGXT,MPC2,EPRS,NR4A2,KYNU,NMI,GATM,AHCY,GCLM,CTH,RPS20,VCP,ST3GAL3,GALE,EXTL1,SESN2,RPL22,MTHFR,UGDH,MTHFD2L,MMAB,ASNS,ATG7,IDH2,QPRT,A…
response to steroid hormone	0.0113	379	993	38	10	BP	DAXX,CALR,PHB2,AQP1,NR1I3,CAV1,BMP7,SGK1,ARG1,CRY1,AVPR1A,SREBF1,NCOA1,NR1D1,FOS,PPARA,CLDN1,NR1I2,RELA,CPN1,AGXT,NR4A2,ABCA2,RORC,CASP9,CLOCK,ABCG2,SMARCA4,KANK2,TXNIP,UBE2L3,BMP6,IGFBP2,PIK3R1,GJB2,ARNTL,NTRK2,RPL32
response to nutrient levels	0.000739	496	993	49	9.9	BP	ANGPTL4,POR,BMP7,ABCA1,PDK4,LRP11,ARG1,SREBF1,NCOA1,HMGCR,PPARA,SREBF2,PLEC,ARSA,PIM1,CBS,EIF2AK2,RELA,DNTT,BAIAP2,RPTOR,ATF3,KYNU,GATM,SORD,AHCY,NTRK1,GCLM,SESN2,MTHFR,ALB,ASNS,ABCG2,ATG7,BBS2,MAP1LC3B,LDLR,KANK2,IREB2,IGFBP2,GCK,ACACB,ZC3H12A,PCSK9,TRP53,G6PC,FCOR,HMGCS1,MUP12
apical part of cell	0.00735	416	993	41	9.9	CC	SRR,AQP1,CAV1,SLC3A2,HSD11B1,SLC22A5,SLC17A1,OCLN,CLDN1,PLEC,GPIHBP1,APP,SLC10A2,SLC23A1,ACY3,CD55,ABCB11,LRP2,ATP6V0D2,MPDZ,CYP4A31,ABCB1B,ABCG2,NOX4,AQP8,STX4A,LDLR,ACPP,ANK2,GNAT1,REEP6,CLIC4,IGFBP2,MREG,ATP8B1,SLC7A5,ABCB1A,ABCB4,CYP4A32,FAT1,HSPA1A
cellular amide metabolic process	1.03e-11	987	993	102	10.3	BP	RPS11,CALR,CS,RPS9,ELOVL1,MVD,RPS18,RPS5,HSD11B1,PDK4,ARG1,VNN3,MKNK2,BTG2,MIF4GD,ACLY,STAT5B,ACOT12,DHFR,EHHADH,EIF4A2,APP,EIF2AK2,RPS14,GSTO1,FASN,CPN1,RPS24,PAIP1,CPEB1,IGFBP5,FARSB,MPC2,EPRS,KYNU,GSTM4,PMVK,GCLM,CTH,RPS20,SESN2,RPL22,MTHFR,MTHFD2L,ASNS,NAT8,ACER3,RBM3,NUDT7,AARS,BACE1,IREB2,GSTA4,CTSH,EEFSEC,GSTT2,ACOT11,RPS29,CEBPA,EIF1,RPS16,RPL10A,FAU,RPL12,RPL22L1,THBS1,GGT6,MRPS27,MVK,AC…
peptide metabolic process	2.88e-05	771	993	71	9.2	BP	RPS11,CALR,RPS9,RPS18,RPS5,MKNK2,BTG2,MIF4GD,DHFR,EIF4A2,APP,EIF2AK2,RPS14,GSTO1,CPN1,RPS24,PAIP1,CPEB1,IGFBP5,FARSB,EPRS,GSTM4,GCLM,CTH,RPS20,SESN2,RPL22,NAT8,RBM3,AARS,BACE1,IREB2,GSTA4,CTSH,EEFSEC,GSTT2,RPS29,EIF1,RPS16,RPL10A,FAU,RPL12,RPL22L1,THBS1,GGT6,MRPS27,MVK,ZC3H12A,NGRN,RPL9,RPS8,RPS23,RPS27RT,BCL3,IMMP2L,IDE,NPM1,PUS7,RPL32,PTK2B,RPS7,RPS12,RPL35,ETHE1,NCK2,RPS28,SARS2,RPL13A,RPL39,R…
cellular response to organic cyclic compound	0.000133	571	993	56	9.8	BP	SMO,DAXX,CALR,PHB2,AQP1,NR1I3,CAV1,BMP7,ABCA1,SGK1,ARG1,CRY1,NR1D1,GPLD1,TERT,PPARA,NR1I2,APP,PIM1,IGFBP5,NR4A2,BMP2,ADAR,GCLM,RORC,PDE4B,CASP9,CLOCK,ACTB,ABCG2,ZC3HAV1,ATG7,NOX4,AQP8,RBM3,SMARCA4,KANK2,DNM2,CEBPA,UBE2L3,DDX58,ABCB4,ZC3H12A,INSIG1,GJB2,ARNTL,NTRK2,NPM1,GNAI1,RPL32,LGALS1,RAP1A,MUP11,MUP18,HMGCS1,MUP12
response to organonitrogen compound	1.7e-08	958	993	92	9.6	BP	KAT2B,SP1,SRR,PSMC3,AQP1,POR,CAV1,BMP7,RARRES2,DNAJB9,ABCA1,PDK4,UBXN6,SGK1,ARG1,CRY1,AVPR1A,BTG2,SREBF1,PSMC5,STAT5B,FOS,GPLD1,DHFR,PPARA,RANGAP1,SREBF2,CYC1,APP,CBS,RELA,RBP4,DNTT,BAIAP2,RPTOR,CPEB1,RHBDD1,IGFBP5,AGXT,EPRS,NR4A2,TOR1A,KYNU,GATM,CRLS1,PDGFC,ZBTB7B,GCLM,VCP,PDE4B,SESN2,SLC25A33,MTHFR,ACTB,ASNS,ABCG2,ATG7,NOX4,PSMC4,AQP8,LDLR,NNMT,DNM2,BTG1,MYLIP,PIK3R1,SERPINA12,GCK,SHC1,PCSK9,PR…
thioester metabolic process	1.34e-07	81	993	21	25.9	BP	CS,ELOVL1,MVD,PDK4,ACLY,ACOT12,EHHADH,FASN,MPC2,KYNU,PMVK,NUDT7,ACOT11,MVK,ACACB,ACOT4,CES1D,GLYAT,ACNAT1,ACOT1,MLYCD
response to organic cyclic compound	1.37e-08	1015	993	96	9.5	BP	SRR,SMO,DAXX,CALR,PHB2,AQP1,NR1I3,CAV1,BMP7,SLC3A2,ABCA1,SGK1,ARG1,CRY1,AVPR1A,BTG2,SREBF1,NAMPT,NCOA1,NR1D1,STAT5B,FOS,GPLD1,TERT,DHFR,PPARA,CLDN1,NR1I2,APP,PIM1,CBS,EIF2AK2,RELA,DNTT,CPN1,IGFBP5,AGXT,NR4A2,KYNU,ABCA2,CRLS1,BMP2,ADAR,PMVK,GCLM,RORC,PDE4B,CASP9,MTHFR,CLOCK,ACTB,ASNS,ABCG2,ZC3HAV1,ATG7,NOX4,AQP8,RBM3,ETS1,SMARCA4,KANK2,DNM2,CEBPA,TXNIP,UBE2L3,BMP6,IGFBP2,THBS1,DDX58,PIK3R1,ACACB,A…
phosphate-containing compound metabolic process	0.00029	3044	993	196	6.4	BP	KAT2B,LGALS9,STK38L,DDT,DAXX,MMD,PHB2,AQP1,PRKACA,CS,ELOVL1,MVD,PPP2R1A,CAV1,GPRC5B,BMP7,RARRES2,ST3GAL1,SLC25A13,CLPX,HSD11B1,MAPKAPK2,SGK2,ATP5G3,ATP6V0A1,PDK4,SGK1,CRY1,MKNK2,CABIN1,TNIP1,IGFBP3,NAMPT,PECAM1,GALK1,ACLY,FDFT1,GPLD1,NSD1,ACOT12,HMGCR,PLAU,RNASEH2B,NADK2,NDUFB9,PPARA,TAB1,CYC1,EHHADH,HRG,APP,RCAN1,SERINC2,PIGX,SYNJ2,PIM1,CBS,EIF2AK2,NELFE,IMPA2,FASN,PI4K2A,NDUFB8,ABHD6,PTPRJ,AATK…
organophosphate metabolic process	4.98e-07	942	993	87	9.2	BP	AQP1,CS,ELOVL1,MVD,SLC25A13,CLPX,HSD11B1,ATP5G3,ATP6V0A1,PDK4,NAMPT,GALK1,ACLY,FDFT1,GPLD1,ACOT12,HMGCR,RNASEH2B,NADK2,NDUFB9,PPARA,CYC1,EHHADH,SERINC2,PIGX,SYNJ2,IMPA2,FASN,PI4K2A,NDUFB8,ABHD6,TALDO1,TK1,ATP5C1,PDGFA,MPC2,KYNU,ITPKA,CRLS1,PMVK,VCP,GALE,PGD,SLC25A33,FAM126A,SULT1B1,DCK,MTHFD2L,IDH2,QPRT,CDIPT,NUDT7,APOA5,LDLR,NMNAT3,ACPP,GDE1,ACOT11,ATP5L,FMO2,FMO1,PIK3R1,PNPLA3,PI4KA,GCK,MVK,ACA…
organophosphate biosynthetic process	0.0354	490	993	44	9	BP	AQP1,ELOVL1,MVD,SLC25A13,ATP5G3,ATP6V0A1,PDK4,NAMPT,GALK1,ACLY,NADK2,PPARA,CYC1,PIGX,PI4K2A,TK1,ATP5C1,PDGFA,MPC2,KYNU,ITPKA,CRLS1,PMVK,VCP,GALE,DCK,MTHFD2L,IDH2,QPRT,CDIPT,NMNAT3,ATP5L,PIK3R1,PNPLA3,GCK,MVK,ACACB,ATP5K,PTK2B,TRP53,FDPS,MOCS1,ETNK2,MLYCD
ribose phosphate metabolic process	3.09e-05	448	993	49	10.9	BP	AQP1,CS,ELOVL1,MVD,SLC25A13,CLPX,HSD11B1,ATP5G3,ATP6V0A1,PDK4,GALK1,ACLY,ACOT12,HMGCR,RNASEH2B,NDUFB9,PPARA,CYC1,EHHADH,FASN,NDUFB8,TALDO1,ATP5C1,MPC2,KYNU,PMVK,VCP,GALE,PGD,SLC25A33,SULT1B1,NUDT7,ACOT11,ATP5L,GCK,MVK,ACACB,ATP5K,COA6,ACOT4,CES1D,TRP53,GLYAT,UQCRH,MOCS1,ACNAT1,NDUFB6,ACOT1,MLYCD
response to hormone	3.24e-08	954	993	91	9.5	BP	KAT2B,SP1,DAXX,CALR,PHB2,AQP1,PRKACA,POR,NR1I3,CAV1,BMP7,RARRES2,STEAP2,PDK4,SGK1,ARG1,CRY1,AVPR1A,BTG2,SREBF1,NCOA1,NR1D1,STAT5B,FOS,GPLD1,PPARA,RANGAP1,SREBF2,CLDN1,CYC1,NR1I2,RELA,RBP4,CPN1,BAIAP2,CPEB1,IGFBP5,AGXT,EPRS,NR4A2,ABCA2,GATM,SORD,CRLS1,ZBTB7B,GCLM,RORC,SESN2,CASP9,SLC25A33,CLOCK,ASNS,ABCG2,BBS2,ETS1,SMARCA4,KANK2,CTSH,BTG1,TXNIP,UQCRFS1,UBE2L3,BMP6,IGFBP2,THBS1,PIK3R1,SERPINA12,GCK…
coenzyme metabolic process	3.39e-11	307	993	49	16	BP	CS,ELOVL1,MVD,HSD11B1,PDK4,VNN3,NAMPT,GALK1,ACLY,ACOT12,HMGCR,DHFR,NADK2,PPARA,EHHADH,GSTO1,FASN,TALDO1,MPC2,KYNU,AHCY,PMVK,VCP,GALE,PGD,MTHFR,MTHFD2L,AHCYL2,IDH2,QPRT,NUDT7,NMNAT3,ACOT11,FMO2,FMO1,GCK,MVK,ACACB,ACOT4,MAT2A,CES1D,TRP53,GLYAT,MOCS1,MTHFS,ACNAT1,ACOT1,GGH,MLYCD
response to lipid	6.2e-08	935	993	89	9.5	BP	LGALS9,SRR,SMO,DAXX,CALR,PHB2,AQP1,NR1I3,CAV1,BMP7,ABCA1,MAPKAPK2,PDK4,SGK1,ARG1,CRY1,AVPR1A,TNIP1,SREBF1,NCOA1,NR1D1,STAT5B,FOS,GPLD1,PPARA,CLDN1,NR1I2,PIM1,EIF2AK2,RELA,RBP4,CPN1,CPEB1,XRCC5,AGXT,MRC1,NR4A2,ABCA2,CRLS1,PMVK,RORC,PDE4B,CASP9,CLOCK,ABCG2,LTBR,TNFRSF1A,NFKBIB,HSD17B2,ETS1,SMARCA4,LDLR,KANK2,CTSH,TRIB1,SERPINE1,TXNIP,LEFTY1,UBE2L3,BMP6,IGFBP2,THBS1,FMO1,PIK3R1,ABCB4,ZC3H12A,PRKCE,I…
response to nitrogen compound	1.11e-08	1088	993	101	9.3	BP	KAT2B,SP1,SRR,PSMC3,DAXX,AQP1,POR,CAV1,BMP7,RARRES2,SLC3A2,DNAJB9,ABCA1,PDK4,UBXN6,SGK1,ARG1,CRY1,AVPR1A,BTG2,SREBF1,PSMC5,STAT5B,FOS,GPLD1,TERT,DHFR,PPARA,RANGAP1,SREBF2,CYC1,APP,CBS,RELA,RBP4,DNTT,BAIAP2,RPTOR,CPEB1,RHBDD1,IGFBP5,AGXT,EPRS,NR4A2,TOR1A,KYNU,GATM,CRLS1,ADAR,PDGFC,ZBTB7B,GCLM,VCP,PDE4B,SESN2,SLC25A33,MTHFR,ACTB,ASNS,ABCG2,ZC3HAV1,ATG7,NOX4,PSMC4,AQP8,RBM3,LDLR,NNMT,DNM2,BTG1,MYLIP…
purine-containing compound metabolic process	7.99e-06	485	993	53	10.9	BP	AQP1,CS,ELOVL1,MVD,SLC25A13,CLPX,ATP5G3,ATP6V0A1,PDK4,GALK1,ACLY,SLC17A1,ACOT12,HMGCR,NDUFB9,PPARA,CYC1,EHHADH,FASN,NDUFB8,ATP5C1,MPC2,KYNU,AHCY,PMVK,VCP,GALE,SLC25A33,SULT1B1,MTHFD2L,AHCYL2,NUDT7,ACPP,ACOT11,ATP5L,GCK,MVK,ACACB,ATP5K,COA6,ACOT4,CES1D,TRP53,GLYAT,UQCRH,MOCS1,AOX3,MACROD2,ACNAT1,NDUFB6,ACOT1,MLYCD,G6PC
nucleobase-containing compound metabolic process	0.0348	5447	993	304	5.6	BP	KAT2B,SP1,IL16,SMO,NACC1,PSMC3,DAXX,HLTF,IKZF4,MCM2,LIPE,CALR,PHB2,AQP1,PRKACA,NR1I3,CS,ELOVL1,MVD,CAV1,CARHSP1,BMP7,DMAP1,RDM1,WNT2,MED15,RPA3,SLC25A13,CLPX,HSD11B1,MAPKAPK2,CMAH,EXOSC10,MAFK,SRSF1,ATP5G3,PELP1,E2F2,ATP6V0A1,PDK4,CRY1,NFYB,TNIP1,BTG2,IGFBP3,SREBF1,NAMPT,NBAS,NCOA1,PSMC5,GALK1,TEN1,NR1D1,ACLY,STAT5B,DCAF4,FOS,TRAF3,ID4,WRNIP1,NSD1,TERT,XRCC4,ACOT12,HMGCR,RNASEH2B,TSC22D1,MBNL2,NA…
nucleobase-containing small molecule metabolic process	1.45e-08	649	993	71	10.9	BP	AQP1,CS,ELOVL1,MVD,SLC25A13,CLPX,HSD11B1,CMAH,ATP5G3,ATP6V0A1,PDK4,NAMPT,GALK1,ACLY,ACOT12,HMGCR,RNASEH2B,NADK2,NDUFB9,PPARA,CYC1,TYMP,PMM2,EHHADH,FASN,NDUFB8,TALDO1,TK1,ATP5C1,MPC2,KYNU,AHCY,PMVK,VCP,GALE,PGD,SLC25A33,UGDH,SULT1B1,DCK,MTHFD2L,AHCYL2,IDH2,QPRT,CDIPT,NUDT7,NMNAT3,ACPP,ACOT11,GALT,ATP5L,FMO2,FMO1,GCK,MVK,ACACB,DCTPP1,ATP5K,COA6,ACOT4,CES1D,TRP53,GLYAT,UQCRH,MOCS1,AOX3,MACROD2,ACNAT…
nucleoside phosphate metabolic process	7.01e-07	577	993	62	10.7	BP	AQP1,CS,ELOVL1,MVD,SLC25A13,CLPX,HSD11B1,ATP5G3,ATP6V0A1,PDK4,NAMPT,GALK1,ACLY,ACOT12,HMGCR,RNASEH2B,NADK2,NDUFB9,PPARA,CYC1,EHHADH,FASN,NDUFB8,TALDO1,TK1,ATP5C1,MPC2,KYNU,PMVK,VCP,GALE,PGD,SLC25A33,SULT1B1,DCK,MTHFD2L,IDH2,QPRT,CDIPT,NUDT7,NMNAT3,ACPP,ACOT11,ATP5L,FMO2,FMO1,GCK,MVK,ACACB,DCTPP1,ATP5K,COA6,ACOT4,CES1D,TRP53,GLYAT,UQCRH,MOCS1,ACNAT1,NDUFB6,ACOT1,MLYCD
nucleoside bisphosphate metabolic process	1.47e-07	98	993	23	23.5	BP	CS,ELOVL1,MVD,PDK4,ACLY,ACOT12,HMGCR,EHHADH,FASN,MPC2,KYNU,PMVK,SULT1B1,NUDT7,ACOT11,MVK,ACACB,ACOT4,CES1D,GLYAT,ACNAT1,ACOT1,MLYCD
ribonucleoside bisphosphate metabolic process	1.47e-07	98	993	23	23.5	BP	CS,ELOVL1,MVD,PDK4,ACLY,ACOT12,HMGCR,EHHADH,FASN,MPC2,KYNU,PMVK,SULT1B1,NUDT7,ACOT11,MVK,ACACB,ACOT4,CES1D,GLYAT,ACNAT1,ACOT1,MLYCD
purine nucleoside bisphosphate metabolic process	1.47e-07	98	993	23	23.5	BP	CS,ELOVL1,MVD,PDK4,ACLY,ACOT12,HMGCR,EHHADH,FASN,MPC2,KYNU,PMVK,SULT1B1,NUDT7,ACOT11,MVK,ACACB,ACOT4,CES1D,GLYAT,ACNAT1,ACOT1,MLYCD
nucleotide metabolic process	4.58e-07	571	993	62	10.9	BP	AQP1,CS,ELOVL1,MVD,SLC25A13,CLPX,HSD11B1,ATP5G3,ATP6V0A1,PDK4,NAMPT,GALK1,ACLY,ACOT12,HMGCR,RNASEH2B,NADK2,NDUFB9,PPARA,CYC1,EHHADH,FASN,NDUFB8,TALDO1,TK1,ATP5C1,MPC2,KYNU,PMVK,VCP,GALE,PGD,SLC25A33,SULT1B1,DCK,MTHFD2L,IDH2,QPRT,CDIPT,NUDT7,NMNAT3,ACPP,ACOT11,ATP5L,FMO2,FMO1,GCK,MVK,ACACB,DCTPP1,ATP5K,COA6,ACOT4,CES1D,TRP53,GLYAT,UQCRH,MOCS1,ACNAT1,NDUFB6,ACOT1,MLYCD
ribonucleotide metabolic process	0.000256	436	993	46	10.6	BP	AQP1,CS,ELOVL1,MVD,SLC25A13,CLPX,ATP5G3,ATP6V0A1,PDK4,GALK1,ACLY,ACOT12,HMGCR,RNASEH2B,NDUFB9,PPARA,CYC1,EHHADH,FASN,NDUFB8,ATP5C1,MPC2,KYNU,PMVK,VCP,GALE,SLC25A33,SULT1B1,NUDT7,ACOT11,ATP5L,GCK,MVK,ACACB,ATP5K,COA6,ACOT4,CES1D,TRP53,GLYAT,UQCRH,MOCS1,ACNAT1,NDUFB6,ACOT1,MLYCD
purine nucleotide metabolic process	0.000467	445	993	46	10.3	BP	AQP1,CS,ELOVL1,MVD,SLC25A13,CLPX,ATP5G3,ATP6V0A1,PDK4,GALK1,ACLY,ACOT12,HMGCR,NDUFB9,PPARA,CYC1,EHHADH,FASN,NDUFB8,ATP5C1,MPC2,KYNU,PMVK,VCP,GALE,SLC25A33,SULT1B1,MTHFD2L,NUDT7,ACOT11,ATP5L,GCK,MVK,ACACB,ATP5K,COA6,ACOT4,CES1D,TRP53,GLYAT,UQCRH,MOCS1,ACNAT1,NDUFB6,ACOT1,MLYCD
purine ribonucleotide metabolic process	0.000277	423	993	45	10.6	BP	AQP1,CS,ELOVL1,MVD,SLC25A13,CLPX,ATP5G3,ATP6V0A1,PDK4,GALK1,ACLY,ACOT12,HMGCR,NDUFB9,PPARA,CYC1,EHHADH,FASN,NDUFB8,ATP5C1,MPC2,KYNU,PMVK,VCP,GALE,SLC25A33,SULT1B1,NUDT7,ACOT11,ATP5L,GCK,MVK,ACACB,ATP5K,COA6,ACOT4,CES1D,TRP53,GLYAT,UQCRH,MOCS1,ACNAT1,NDUFB6,ACOT1,MLYCD
acyl-CoA metabolic process	1.34e-07	81	993	21	25.9	BP	CS,ELOVL1,MVD,PDK4,ACLY,ACOT12,EHHADH,FASN,MPC2,KYNU,PMVK,NUDT7,ACOT11,MVK,ACACB,ACOT4,CES1D,GLYAT,ACNAT1,ACOT1,MLYCD
acetyl-CoA metabolic process	2.09e-06	33	993	13	39.4	BP	CS,MVD,PDK4,ACLY,ACOT12,FASN,MPC2,KYNU,PMVK,NUDT7,MVK,ACACB,MLYCD
cellular response to organonitrogen compound	0.0124	516	993	47	9.1	BP	KAT2B,SP1,AQP1,POR,CAV1,RARRES2,PDK4,SGK1,ARG1,SREBF1,STAT5B,GPLD1,RANGAP1,APP,RELA,BAIAP2,RPTOR,CPEB1,IGFBP5,EPRS,NR4A2,PDGFC,ZBTB7B,GCLM,PDE4B,SESN2,SLC25A33,ACTB,ATG7,NOX4,AQP8,DNM2,PIK3R1,SERPINA12,GCK,SHC1,PCSK9,GJB2,NTRK2,CFL1,TRP53,RAP1A,MUP11,MUP18,MUP16,MUP9,MUP12
cellular response to oxygen-containing compound	3.39e-07	1028	993	93	9	BP	KAT2B,SP1,SMO,PHB2,AQP1,PRKACA,POR,CAV1,RARRES2,ABCA1,PDK4,SGK1,ARG1,AVPR1A,TNIP1,SREBF1,NR1D1,STAT5B,FOS,GPLD1,HMGCR,DHFR,RANGAP1,CLDN1,APP,PIM1,RELA,BAIAP2,RPTOR,CPEB1,MAP4K4,IGFBP5,XRCC5,MPC2,EPRS,MRC1,NR4A2,PDGFC,ZBTB7B,GCLM,RORC,PDE4B,SESN2,CASP9,SLC25A33,ACTB,ABCG2,ATG7,NOX4,NFKBIB,AQP8,STX4A,ETS1,SMARCA4,LDLR,KANK2,IREB2,TRIB1,DNM2,SIGMAR1,SERPINE1,BMP6,PIK3R1,SERPINA12,GCK,ABCB4,SHC1,ZC3H…
sulfur compound biosynthetic process	0.000149	87	993	18	20.7	BP	SP1,ELOVL1,PDK4,ACLY,CBS,MPC2,AHCY,GCLM,CTH,MTHFR,MTHFD2L,GGT6,ACACB,MAT2A,GM5096,MPST,MLYCD,BHMT
cofactor biosynthetic process	0.0139	228	993	27	11.8	BP	ELOVL1,PDK4,NAMPT,GALK1,ACLY,DHFR,NADK2,PPARA,GSTO1,MPC2,KYNU,GCLM,GALE,MMAB,IDH2,QPRT,IREB2,NMNAT3,RSAD1,GGT6,GCK,ACACB,MAT2A,TRP53,MOCS1,MTHFS,MLYCD
coenzyme biosynthetic process	0.0397	175	993	22	12.6	BP	ELOVL1,PDK4,NAMPT,GALK1,ACLY,DHFR,NADK2,PPARA,GSTO1,MPC2,KYNU,GALE,IDH2,QPRT,NMNAT3,GCK,ACACB,MAT2A,TRP53,MOCS1,MTHFS,MLYCD
cellular nitrogen compound biosynthetic process	0.00233	4675	993	274	5.9	BP	KAT2B,SP1,IL16,SMO,NACC1,PSMC3,DAXX,HLTF,IKZF4,LIPE,RPS11,CALR,PHB2,AQP1,NR1I3,RPS9,ELOVL1,CAV1,CARHSP1,RPS18,BMP7,DMAP1,WNT2,MED15,RPS5,SLC25A13,EXOSC10,MAFK,ATP5G3,PELP1,E2F2,ATP6V0A1,PDK4,ARG1,CRY1,MKNK2,NFYB,TNIP1,BTG2,SREBF1,NAMPT,NCOA1,PSMC5,MIF4GD,GALK1,TEN1,NR1D1,ACLY,STAT5B,FOS,TRAF3,ID4,WRNIP1,NSD1,TERT,DHFR,TSC22D1,NADK2,PPARA,L3MBTL2,SREBF2,IL1RAP,CYC1,PMM2,NR1I2,EIF4A2,APP,PARP3,FOXP…
amide biosynthetic process	2.28e-05	736	993	69	9.4	BP	RPS11,CALR,RPS9,ELOVL1,RPS18,RPS5,PDK4,ARG1,MKNK2,BTG2,MIF4GD,ACLY,DHFR,EIF4A2,APP,EIF2AK2,RPS14,RPS24,PAIP1,CPEB1,IGFBP5,FARSB,MPC2,EPRS,GCLM,RPS20,SESN2,RPL22,ASNS,RBM3,AARS,IREB2,EEFSEC,RPS29,CEBPA,EIF1,RPS16,RPL10A,FAU,RPL12,RPL22L1,THBS1,GGT6,MRPS27,MVK,ACACB,ZC3H12A,NGRN,RPL9,RPS8,RPS23,RPS27RT,BCL3,NPM1,PUS7,RPL32,PTK2B,RPS7,RPS12,RPL35,MTHFS,NCK2,RPS28,SARS2,MLYCD,RPL13A,RPL39,RPS27,RPL41
peptide biosynthetic process	0.000428	637	993	59	9.3	BP	RPS11,CALR,RPS9,RPS18,RPS5,MKNK2,BTG2,MIF4GD,DHFR,EIF4A2,APP,EIF2AK2,RPS14,RPS24,PAIP1,CPEB1,IGFBP5,FARSB,EPRS,GCLM,RPS20,SESN2,RPL22,RBM3,AARS,IREB2,EEFSEC,RPS29,EIF1,RPS16,RPL10A,FAU,RPL12,RPL22L1,THBS1,GGT6,MRPS27,MVK,ZC3H12A,NGRN,RPL9,RPS8,RPS23,RPS27RT,BCL3,NPM1,PUS7,RPL32,PTK2B,RPS7,RPS12,RPL35,NCK2,RPS28,SARS2,RPL13A,RPL39,RPS27,RPL41
response to drug	5.29e-07	1021	993	92	9	BP	SRR,DAXX,SLC25A1,CALR,AQP1,POR,SLC5A6,CAV1,DMAP1,SLC25A13,ABCA1,SLC22A5,SLC25A22,ARG1,SLC36A1,SREBF1,NCOA1,FOS,SLC25A29,GPLD1,HMGCR,DHFR,CHRNA2,PPARA,CLDN1,ARSA,NR1I2,CBS,RELA,RBP4,DNTT,BAIAP2,XRCC5,NR4A2,TOR1A,KYNU,PSMD14,ABCB11,LRP2,SORD,CRLS1,CAR3,NTRK1,GCLM,PDE4B,CYP4B1,CASP9,ABCB1B,MTHFR,ACTB,ASNS,ABCG2,ATG7,SLC25A15,SLC7A2,ETS1,NNMT,GSTA4,DNM2,SIGMAR1,SLC38A7,RPL10A,TXNIP,UQCRFS1,CAR14,IGFB…
oxoacid metabolic process	1.38e-16	920	993	108	11.7	BP	SCPEP1,SRR,LIPE,POR,CS,GCAT,ELOVL1,CAV1,MID1IP1,PLIN5,ST3GAL1,CMAH,PDK4,ARG1,VNN3,AVPR1A,SREBF1,GALK1,NR1D1,ACLY,STAT5B,ECI2,ACOT12,DHFR,ACOX2,HACL1,PPARA,EHHADH,ACAT2,CYP39A1,PIM1,CBS,STARD4,FADS3,LIPA,GSTO1,FASN,ACADL,FARSB,AGXT,SCLY,SLC45A3,MPC2,EPRS,KYNU,HSD17B12,GATM,SLC27A2,LPIN3,AHCY,GCLM,CTH,GALE,CYP4A31,SESN2,PGD,MTHFR,UGDH,SULT1B1,MTHFD2L,PRKAB1,ASNS,AHCYL2,ABCG2,TNFRSF1A,SLC27A5,IDH2,N…
carboxylic acid metabolic process	1.45e-17	880	993	107	12.2	BP	SCPEP1,SRR,LIPE,POR,CS,GCAT,ELOVL1,CAV1,MID1IP1,PLIN5,ST3GAL1,CMAH,PDK4,ARG1,VNN3,AVPR1A,SREBF1,GALK1,NR1D1,ACLY,STAT5B,ECI2,ACOT12,DHFR,ACOX2,HACL1,PPARA,EHHADH,ACAT2,CYP39A1,PIM1,CBS,STARD4,FADS3,LIPA,GSTO1,FASN,ACADL,FARSB,AGXT,SCLY,SLC45A3,MPC2,EPRS,KYNU,HSD17B12,GATM,SLC27A2,LPIN3,AHCY,GCLM,CTH,GALE,CYP4A31,SESN2,PGD,MTHFR,UGDH,MTHFD2L,PRKAB1,ASNS,AHCYL2,ABCG2,TNFRSF1A,SLC27A5,IDH2,NOX4,QPRT…
monocarboxylic acid metabolic process	2e-14	547	993	75	13.7	BP	SCPEP1,SRR,LIPE,POR,ELOVL1,CAV1,MID1IP1,PLIN5,PDK4,VNN3,AVPR1A,SREBF1,GALK1,NR1D1,ACLY,STAT5B,ECI2,ACOT12,ACOX2,HACL1,PPARA,EHHADH,ACAT2,CYP39A1,STARD4,FADS3,LIPA,FASN,ACADL,AGXT,SLC45A3,MPC2,KYNU,HSD17B12,SLC27A2,LPIN3,GALE,CYP4A31,SESN2,PGD,PRKAB1,ASNS,TNFRSF1A,SLC27A5,IDH2,APOA5,ETFA,ACOT11,UGT2A3,DECR2,AKR1D1,ATP8B1,PNPLA3,GCK,ACACB,CYP2C37,FADS6,PRKCE,INSIG1,ACOT4,CYP2C50,CES1D,TRP53,CYP2D22…
organic acid catabolic process	0.000845	210	993	28	13.3	BP	LIPE,GCAT,PLIN5,ARG1,ECI2,ACOX2,HACL1,EHHADH,ACAT2,CYP39A1,CBS,ACADL,AGXT,SCLY,KYNU,SLC27A2,LPIN3,AHCY,CYP4A31,SESN2,QPRT,ETFA,AKR1D1,ACACB,ACOT4,CES1D,CYP4A32,MLYCD
carboxylic acid catabolic process	0.000845	210	993	28	13.3	BP	LIPE,GCAT,PLIN5,ARG1,ECI2,ACOX2,HACL1,EHHADH,ACAT2,CYP39A1,CBS,ACADL,AGXT,SCLY,KYNU,SLC27A2,LPIN3,AHCY,CYP4A31,SESN2,QPRT,ETFA,AKR1D1,ACACB,ACOT4,CES1D,CYP4A32,MLYCD
monocarboxylic acid catabolic process	0.000196	108	993	20	18.5	BP	LIPE,PLIN5,ECI2,ACOX2,HACL1,EHHADH,ACAT2,CYP39A1,ACADL,AGXT,SLC27A2,LPIN3,CYP4A31,SESN2,ETFA,AKR1D1,ACACB,CES1D,CYP4A32,MLYCD
organic acid biosynthetic process	3.6e-07	342	993	45	13.2	BP	SRR,ELOVL1,MID1IP1,PDK4,AVPR1A,SREBF1,GALK1,NR1D1,ACLY,DHFR,PPARA,CYP39A1,CBS,STARD4,FADS3,GSTO1,FASN,AGXT,SLC45A3,KYNU,HSD17B12,GATM,SLC27A2,AHCY,CTH,GALE,MTHFR,UGDH,MTHFD2L,PRKAB1,ASNS,SLC27A5,OAT,APOA5,DECR2,AKR1D1,GCK,ACACB,FADS6,INSIG1,TRP53,MTHFS,GM5096,MLYCD,BHMT
carboxylic acid biosynthetic process	2.96e-07	340	993	45	13.2	BP	SRR,ELOVL1,MID1IP1,PDK4,AVPR1A,SREBF1,GALK1,NR1D1,ACLY,DHFR,PPARA,CYP39A1,CBS,STARD4,FADS3,GSTO1,FASN,AGXT,SLC45A3,KYNU,HSD17B12,GATM,SLC27A2,AHCY,CTH,GALE,MTHFR,UGDH,MTHFD2L,PRKAB1,ASNS,SLC27A5,OAT,APOA5,DECR2,AKR1D1,GCK,ACACB,FADS6,INSIG1,TRP53,MTHFS,GM5096,MLYCD,BHMT
monocarboxylic acid biosynthetic process	0.000281	236	993	31	13.1	BP	SRR,ELOVL1,MID1IP1,PDK4,AVPR1A,SREBF1,GALK1,NR1D1,ACLY,PPARA,CYP39A1,STARD4,FADS3,FASN,AGXT,SLC45A3,HSD17B12,SLC27A2,GALE,PRKAB1,ASNS,SLC27A5,APOA5,DECR2,AKR1D1,GCK,ACACB,FADS6,INSIG1,TRP53,MLYCD
cellular response to nitrogen compound	0.00264	610	993	55	9	BP	KAT2B,SP1,DAXX,AQP1,POR,CAV1,RARRES2,PDK4,SGK1,ARG1,SREBF1,STAT5B,GPLD1,TERT,RANGAP1,APP,RELA,BAIAP2,RPTOR,CPEB1,IGFBP5,EPRS,NR4A2,ADAR,PDGFC,ZBTB7B,GCLM,PDE4B,SESN2,SLC25A33,ACTB,ZC3HAV1,ATG7,NOX4,AQP8,RBM3,DNM2,DDX58,PIK3R1,SERPINA12,GCK,SHC1,ZC3H12A,PCSK9,GJB2,NTRK2,CFL1,NPM1,TRP53,RAP1A,MUP11,MUP18,MUP16,MUP9,MUP12
regulation of cellular ketone metabolic process	0.0447	115	993	17	14.8	BP	CAV1,MID1IP1,PLIN5,PDK4,AVPR1A,SREBF1,NR1D1,PPARA,STARD4,SLC45A3,BMP2,APOA5,BMP6,ACACB,PRKCE,INSIG1,MLYCD
response to oxygen-containing compound	3.12e-12	1609	993	144	8.9	BP	KAT2B,LGALS9,SP1,SRR,SMO,CALR,PHB2,AQP1,PRKACA,POR,CAV1,BMP7,RARRES2,DMAP1,ABCA1,MAPKAPK2,PDK4,LRP11,SGK1,ARG1,CRY1,AVPR1A,TNIP1,BTG2,SREBF1,NCOA1,NR1D1,STAT5B,FOS,GPLD1,HMGCR,DHFR,PPARA,RANGAP1,CLDN1,CYC1,ARSA,APP,PIM1,CBS,EIF2AK2,RELA,RBP4,DNTT,BAIAP2,RPTOR,CPEB1,MAP4K4,IGFBP5,XRCC5,AGXT,MPC2,EPRS,MRC1,NR4A2,PSMD14,ABCA2,GATM,CRLS1,CAR3,PMVK,PDGFC,ZBTB7B,NTRK1,GCLM,RORC,PDE4B,SESN2,CASP9,SLC25A…
fatty acid metabolic process	3.93e-11	365	993	54	14.8	BP	LIPE,POR,ELOVL1,CAV1,MID1IP1,PLIN5,PDK4,AVPR1A,SREBF1,ACLY,STAT5B,ECI2,ACOT12,ACOX2,HACL1,PPARA,EHHADH,ACAT2,FADS3,LIPA,FASN,ACADL,SLC45A3,HSD17B12,SLC27A2,LPIN3,CYP4A31,SESN2,PRKAB1,TNFRSF1A,SLC27A5,APOA5,ETFA,ACOT11,DECR2,PNPLA3,ACACB,CYP2C37,FADS6,INSIG1,ACOT4,CYP2C50,CES1D,CYP2D22,CYP4A32,CYP4A12A,CYP2C54,CYP2D40,ACNAT1,ACOT1,MLYCD,CYP2C68,ACSF2,CYP2D10
long-chain fatty acid metabolic process	0.0125	94	993	16	17	BP	LIPE,ACADL,SLC27A2,CYP4A31,SLC27A5,PNPLA3,CYP2C37,ACOT4,CYP2C50,CYP2D22,CYP4A32,CYP2C54,CYP2D40,ACOT1,CYP2C68,CYP2D10
fatty acid catabolic process	0.00192	92	993	17	18.5	BP	LIPE,PLIN5,ECI2,ACOX2,HACL1,EHHADH,ACAT2,ACADL,SLC27A2,LPIN3,CYP4A31,SESN2,ETFA,ACACB,CES1D,CYP4A32,MLYCD
mitochondrial part	1.4e-05	913	993	81	8.9	CC	SLC25A1,PHB2,LETM1,TOMM40L,CS,GCAT,SLC25A13,CLPX,BIK,ATP5G3,SLC25A22,PDK4,RTN4IP1,ARG1,MICU1,SLC25A29,2010107E04RIK,SLC25A48,TERT,BNIP3L,NDUFB9,CYC1,SYNJ2,SLC25A45,NDUFB8,SIRT3,ATP5C1,ACADL,MFF,AGXT,MPC2,GATM,SORD,CRLS1,ABCB8,SLC25A33,MTHFD2L,IDH2,OAT,SLC25A15,CYB5B,REXO2,ETFA,SLC25A20,DNM2,COX18,ALDH1B1,PNPLA7,TXNIP,UQCRFS1,ATP5L,TIMM8B,NDUFB10,MRPS27,ABCA8A,CHCHD7,IKBKE,SHC1,NGRN,TIMM8A1,SLC25A…
regulation of cellular carbohydrate metabolic process	1.86e-05	144	993	25	17.4	BP	KAT2B,HSD11B1,PDK4,IGFBP3,NR1D1,PPARA,TFF3,IGFBP5,SLC45A3,RORC,SESN2,LCMT1,SERPINA12,GCK,ACACB,PRKCE,LEPR,PTK2B,TRP53,MUP11,MLYCD,MUP18,MUP16,MUP9,MUP12
regulation of glucose metabolic process	1.99e-05	114	993	22	19.3	BP	KAT2B,PDK4,IGFBP3,NR1D1,PPARA,TFF3,IGFBP5,SLC45A3,RORC,SESN2,LCMT1,SERPINA12,GCK,ACACB,LEPR,TRP53,MUP11,MLYCD,MUP18,MUP16,MUP9,MUP12
response to toxic substance	0.013	548	993	49	8.9	BP	DAXX,INMT,AQP1,DMAP1,ARG1,PXDN,FOS,AAED1,HMGCR,DHFR,CHRNA2,PPARA,CLDN1,ARSA,EIF2AK2,SLC23A1,RELA,RBP4,GSTO1,NR4A2,PSMD14,CAR3,NTRK1,GPX7,SESN2,ACTB,ASNS,ETS1,GSTA4,SRXN1,PPP1R9A,GSTT2,DNM2,SIGMAR1,RPL10A,TXNIP,CLDN5,ZC3H12A,PRKCE,S100A8,CFL1,CES1D,PTK2B,TRP53,PPP1R1B,GLYAT,MT-ND6,GGH,BNIP3
regulation of apoptotic process	0.0212	1553	993	107	6.9	BP	SMO,ANGPTL4,PHB2,AQP1,POR,PPP2R1A,CAV1,BMP7,BIK,SGK2,PDK4,SGK1,BTG2,IGFBP3,NCOA1,TMIGD1,STAT5B,TRAF3,GPLD1,TERT,HMGCR,TSC22D1,BNIP3L,HRG,KRT18,PIM1,CBS,EIF2AK2,RELA,SLC40A1,MAP4K4,RHBDD1,MFF,ATF3,NEK6,FAM129B,NR4A2,BMP2,ZC3H8,ADAR,LMNA,NTRK1,GCLM,CTH,EPHA7,VCP,CASP9,SLC35F6,ALB,ASNS,NAT8,CIDEC,ATG7,LTBR,TNFRSF1A,NOX4,ZFAND6,LCMT1,STX4A,PDILT,FGFR1,AARS,BIRC3,ETS1,SMARCA4,CTSH,ANK2,RPS29,SIGMAR1,G…
organelle envelope	2.36e-06	1115	993	96	8.6	CC	S100A6,KPNB1,SLC25A1,CALR,PHB2,AQP1,LETM1,TOMM40L,GCAT,OIT3,ATRAID,SLC25A13,CLPX,HSD11B1,NUP50,BIK,ATP5G3,SLC25A22,PDK4,RTN4IP1,ARG1,MICU1,SLC25A29,2010107E04RIK,SLC25A48,BNIP3L,NDUFB9,RANGAP1,CYC1,APP,SYNJ2,SLC25A45,GSTO1,NDUFB8,SIRT3,ATP5C1,ACADL,MFF,AHCTF1,MPC2,TOR1B,TOR1A,GATM,SORD,CRLS1,LMNA,ABCB8,SLC25A33,MTHFD2L,IDH2,SLC25A15,CYB5B,REXO2,SH3BGRL2,PARP16,SLC25A20,DNM2,DDX19B,COX18,SIGMAR1,P…
envelope	2.47e-06	1116	993	96	8.6	CC	S100A6,KPNB1,SLC25A1,CALR,PHB2,AQP1,LETM1,TOMM40L,GCAT,OIT3,ATRAID,SLC25A13,CLPX,HSD11B1,NUP50,BIK,ATP5G3,SLC25A22,PDK4,RTN4IP1,ARG1,MICU1,SLC25A29,2010107E04RIK,SLC25A48,BNIP3L,NDUFB9,RANGAP1,CYC1,APP,SYNJ2,SLC25A45,GSTO1,NDUFB8,SIRT3,ATP5C1,ACADL,MFF,AHCTF1,MPC2,TOR1B,TOR1A,GATM,SORD,CRLS1,LMNA,ABCB8,SLC25A33,MTHFD2L,IDH2,SLC25A15,CYB5B,REXO2,SH3BGRL2,PARP16,SLC25A20,DNM2,DDX19B,COX18,SIGMAR1,P…
positive regulation of cell communication	0.0373	1610	993	109	6.8	BP	LGALS9,DDT,SMO,CALR,PHB2,POR,PPP2R1A,CAV1,CLSTN3,GPRC5B,BMP7,WNT2,BIK,DHX58,RSPO3,IGFBP3,PECAM1,TERT,HMGCR,TAB1,APP,EIF2AK2,NELFE,RELA,RBP4,TRIM8,GSTO1,PTPRJ,BAIAP2,SIRT3,RPTOR,PDGFA,IGFBP5,MPC2,ATF3,TRIM44,BMP2,ZBP1,PDGFC,ZBTB7B,NTRK1,CTH,VCP,EXOC4,ZC3HAV1,ATG7,LTBR,TNFRSF1A,NOX4,KCTD13,STX4A,FAM53B,FGFR1,SMARCA4,CTSH,RYK,ACPP,PPP1R9A,ROR1,PRR5,GADD45A,TBC1D24,FGF1,APOPT1,TGM2,LEFTY1,BMP6,MMD2,C…
cellular response to endogenous stimulus	4.65e-06	1244	993	103	8.3	BP	KAT2B,SP1,DAXX,CALR,PHB2,AQP1,PRKACA,POR,NR1I3,CAV1,BMP7,RARRES2,WNT2,FUZ,PDK4,SGK1,ARG1,CRY1,AVPR1A,SREBF1,NCOA1,NR1D1,STAT5B,FOS,GPLD1,PPARA,RANGAP1,TAB1,CLDN1,NR1I2,APP,RELA,BAIAP2,RPTOR,CPEB1,IGFBP5,EPRS,NR4A2,LRP2,BMP2,PDGFC,ZBTB7B,NTRK1,GCLM,RORC,PDE4B,SESN2,CASP9,SLC25A33,CLOCK,ACTB,ASNS,ABCG2,ATG7,NOX4,AQP8,FGFR1,BBS2,CDH5,SMARCA4,KANK2,IREB2,CTSH,ADAMTS7,DNM2,FGF1,LEFTY1,UBE2L3,BMP6,IGFB…
carbohydrate derivative metabolic process	0.000236	1023	993	84	8.2	BP	AQP1,CS,ELOVL1,MVD,ST3GAL1,SLC25A13,CLPX,HSD11B1,CMAH,ATP5G3,ATP6V0A1,PDK4,TNIP1,GALK1,ACLY,GPLD1,ACOT12,HMGCR,RNASEH2B,NDUFB9,PPARA,CYC1,TYMP,PMM2,ST3GAL6,EHHADH,PIGX,PIM1,FASN,NDUFB8,TALDO1,TK1,ATP5C1,APCS,MPC2,KYNU,BMP2,AHCY,PMVK,VCP,ST3GAL3,GALE,EXTL1,PGD,SLC25A33,UGDH,SULT1B1,DCK,AHCYL2,ABCG2,LYVE1,NUDT7,ST3GAL4,GORASP1,ACPP,RAMP1,TMEM5,ACOT11,GALT,ATP5L,ASGR2,GCK,MVK,ACACB,DCTPP1,PXYLP1,DPY…
endoplasmic reticulum part	0.000745	1001	993	81	8.1	CC	KPNB1,CYP51,ERGIC1,CALR,POR,ELOVL1,CAV1,CLSTN3,KDSR,DNAJB9,HSD11B1,SGK1,SREBF1,NBAS,FDFT1,SSR1,HMGCR,SQLE,SREBF2,PIGX,CYP39A1,FADS3,RHBDD1,TOR1B,TOR1A,HSD17B12,PEX16,SLC27A2,CYP2U1,VCP,CYP4B1,EXTL1,FAM69A,NAT8,TMCC1,SLC27A5,NOX4,CDIPT,ACER3,ANKS4B,NSDHL,MSMO1,SC5D,PARP16,COLGALT2,LSS,RPS29,REEP6,TMTC2,SIGMAR1,PNPLA7,TAP1,TAPBPL,FMO2,FMO1,ASGR2,PIK3R1,CYP2C37,ZC3H12A,SLC35G1,PCSK9,INSIG1,IRGM1,AGM…
hydrolase activity, acting on acid anhydrides	0.00475	864	993	70	8.1	MF	PSMC3,HLTF,NUDT14,MCM2,MYO9B,ATP4A,ABCA1,CLPX,DHX58,ATP5G3,ATP6V0A1,PSMC5,WRNIP1,MYH9,EIF4A2,ATP5C1,XRCC5,TUBA4A,TOR1B,TOR1A,ABCA2,DYNC1I2,ABCB11,GINS1,ATP9A,ATP6V0D2,VCP,PSMC2,ABCB1B,ABCB8,RASL11A,GNGT1,ABCG2,PSMC4,RAB30,MYH14,DNHD1,LHPP,ATP11A,NUDT7,SMARCA4,GNG11,EEFSEC,DNM2,DDX19B,RECQL4,INO80,GNAT1,TUBB4B,TAP1,ATP11B,ATP5L,ATP8B1,RHOU,DDX58,ABCB1A,DDX24,ABCA8A,DCTPP1,ABCB4,TUBA1C,IRGM1,ARL4A,…
regulation of response to external stimulus	0.0457	688	993	56	8.1	BP	LGALS9,DDT,IL16,CALR,CAV1,GPRC5B,RARRES2,DHX58,ARG1,TNIP1,STAT5B,TRAF3,HMGCR,PLAU,PPARA,HRG,APP,RELA,PDGFA,CD55,TRIM44,CLOCK,ZC3HAV1,TNFRSF1A,STX4A,FGFR1,SLC7A2,BBS2,CDH5,ETS1,LDLR,KANK2,TRIB1,RYK,FGF1,SERPINE1,TGM2,BMP6,CAMK1D,METRNL,THBS1,DDX58,MVK,ADORA1,ZC3H12A,CTLA2A,USP14,VAMP8,PRKCA,CX3CR1,S100A8,PTK2B,CALCRL,CXCL12,CNR2,TMEM102
positive regulation of steroid metabolic process	0.0306	33	993	9	27.3	BP	CYP17A1,POR,SREBF1,NR1D1,STARD4,APOA5,FGF1,BMP6,FDPS
positive regulation of gene expression	0.016	1835	993	123	6.7	BP	KAT2B,LGALS9,SP1,SMO,PSMC3,HLTF,IKZF4,CALR,NR1I3,RPS9,CAV1,BMP7,WNT2,FUZ,MAPKAPK2,SRSF1,PELP1,E2F2,NFYB,TNIP1,SREBF1,NAMPT,NBAS,NCOA1,PSMC5,NR1D1,STAT5B,FOS,ID4,NSD1,TERT,TSC22D1,PPARA,MYH9,SREBF2,NR1I2,APP,NELFE,RELA,PAIP1,SIRT3,RPTOR,CPEB1,SLC40A1,RHBDD1,DCAF6,ATF3,FAM129B,NR4A2,MED19,SP3,TRIM44,BMP2,ZC3H8,LPIN3,ZFP64,ADAR,ZBTB7B,LMNA,RORC,SESN2,CLOCK,PRKAB1,TFEC,RASL11A,NAT8,CNBP,ETV6,TNFRSF1A…
protein transport	0.0462	1618	993	109	6.7	BP	TOM1L2,VPREB3,SNAPIN,LGALS9,PCNT,KPNB1,SMO,CALR,PHB2,PRKACA,TOMM40L,DMAP1,FUZ,ABCA1,NUP50,VPS53,HSPA4,SREBF1,NR1D1,SSR1,HMGCR,AP3M1,BNIP3L,RANGAP1,MYH9,IL1RAP,GPIHBP1,PMM2,KRT18,RBP4,SIRT3,PARD3,MAP4K4,RHBDD1,MFF,AHCTF1,COPA,MPC2,TOR1A,LRP2,PEX16,ADAR,ZBTB7B,LMNA,RORC,UBAP1,VCP,CLOCK,RILPL1,EXOC4,ATG7,TNFRSF1A,IDH2,ZFAND6,STX4A,BBS2,WWP2,CMTM6,GORASP1,ANK2,DNM2,VPS18,RAMP1,FRAS1,DENND1A,COX18,TAP…
cell death	0.0106	2060	993	136	6.6	BP	SMO,ANGPTL4,DAXX,MCM2,PHB2,AQP1,POR,PPP2R1A,CAV1,BMP7,MLKL,BIK,SGK2,E2F2,PDK4,SGK1,MKNK2,CABIN1,BTG2,IGFBP3,NCOA1,TMIGD1,STAT5B,FOS,TRAF3,GPLD1,TERT,HMGCR,ACOX2,PLAU,TSC22D1,BNIP3L,PPARA,HRG,APP,KRT18,PIM1,CBS,EIF2AK2,RELA,JADE1,SLC40A1,MAP4K4,RHBDD1,MFF,ATF3,NEK6,FAM129B,NR4A2,BMP2,ZC3H8,ADAR,LMNA,NTRK1,GCLM,CTH,EPHA7,VCP,CASP9,SLC35F6,ALB,RILPL1,GNGT1,ASNS,NAT8,ETV6,CIDEC,ATG7,LTBR,TNFRSF1A,NOX…
positive regulation of cellular metabolic process	0.000446	3062	993	196	6.4	BP	KAT2B,LGALS9,SP1,DDT,SMO,PSMC3,DAXX,HLTF,IKZF4,CYP17A1,MMD,PHB2,POR,NR1I3,RPS9,CAV1,MID1IP1,GPRC5B,BMP7,RARRES2,WNT2,PLIN5,FUZ,CLPX,LONRF3,MAPKAPK2,SRSF1,PELP1,E2F2,AVPR1A,NFYB,TNIP1,BTG2,IGFBP3,SREBF1,NAMPT,RNF144A,NCOA1,PSMC5,PECAM1,NR1D1,STAT5B,FOS,GPLD1,ID4,NSD1,TERT,HMGCR,PLAU,TSC22D1,BNIP3L,PPARA,L3MBTL2,TAB1,MYH9,SREBF2,NR1I2,APP,PARP3,EIF2AK2,NELFE,STARD4,LTB,RELA,TRIM8,NAB2,PAIP1,PAOX,SI…
transmembrane transporter activity	0.00133	1032	993	82	7.9	MF	S100A6,SLC25A1,AQP1,LETM1,ATP4A,TOMM40L,SLC5A6,SLC3A2,SLC41A1,CLIC3,SLC25A13,ABCA1,ATP5G3,SLC22A5,SLC25A22,ATP6V0A1,SLC16A7,SLC1A4,SLC36A1,SLC25A29,SLC17A1,SLC25A48,CHRNA2,GPIHBP1,SLC10A2,SERINC2,SLC23A1,SLC25A45,RBP4,ATP5C1,SLC40A1,SLC45A3,MPC2,ABCA2,ABCB11,SLC27A2,SLC20A1,TMEM144,ASIC5,ATP6V0D2,ABCB1B,ABCB8,SLC25A33,SLC35F6,ABCG2,SLCO1A4,SLC27A5,AQP8,RASA3,SLC25A15,SLC7A2,SLCO2A1,SLC25A20,CALHM…
regulation of cellular protein metabolic process	0.0109	2532	993	161	6.4	BP	KAT2B,LGALS9,DDT,PSMC3,DAXX,CALR,MMD,PHB2,AQP1,PRKACA,POR,RPS9,PPP2R1A,CAV1,GPRC5B,BMP7,RARRES2,FUZ,ATRAID,CLPX,LONRF3,CRY1,MKNK2,CABIN1,TNIP1,BTG2,IGFBP3,SREBF1,RNF144A,PSMC5,PECAM1,MIF4GD,GPLD1,NSD1,TERT,HMGCR,DHFR,L3MBTL2,TAB1,MYH9,HRG,APP,RCAN1,CBS,EIF2AK2,NELFE,RPS14,RELA,PTPRJ,NAB2,PAIP1,SIRT3,RPTOR,CPEB1,PARD3,PDGFA,MAP4K4,RHBDD1,IGFBP5,XRCC5,CD55,EPRS,ATF3,NEK6,PSMD14,NMI,TRIM44,BMP2,ADAR…
regulation of protein metabolic process	0.0162	2703	993	169	6.3	BP	KAT2B,LGALS9,DDT,PSMC3,DAXX,CALR,MMD,PHB2,AQP1,PRKACA,POR,RPS9,PPP2R1A,CAV1,GPRC5B,BMP7,RARRES2,FUZ,ATRAID,CLPX,LONRF3,MAPKAPK2,CRY1,MKNK2,CABIN1,TNIP1,BTG2,IGFBP3,SREBF1,RNF144A,PSMC5,PECAM1,MIF4GD,STAT5B,TRAF3,GPLD1,NSD1,TERT,HMGCR,DHFR,L3MBTL2,TAB1,MYH9,HRG,APP,RCAN1,CBS,EIF2AK2,NELFE,LTB,RPS14,RELA,PTPRJ,NAB2,PAIP1,SIRT3,RPTOR,CPEB1,PARD3,PDGFA,MAP4K4,RHBDD1,IGFBP5,XRCC5,CD55,APCS,EPRS,ATF3,N…
cellular response to organic substance	3.15e-09	2267	993	174	7.7	BP	KAT2B,SP1,SMO,DAXX,MCM2,CALR,PHB2,AQP1,PRKACA,POR,NR1I3,CAV1,BMP7,RARRES2,WNT2,FUZ,DNAJB9,ABCA1,MAPKAPK2,PDK4,SGK1,ARG1,CRY1,AVPR1A,NFYB,TNIP1,SREBF1,NCOA1,NR1D1,STAT5B,FOS,TRAF3,GPLD1,TERT,OCLN,HMGCR,PPARA,RANGAP1,TAB1,CLDN1,IL1RAP,ST3GAL6,NR1I2,HRG,EIF4A2,APP,KRT18,PIM1,EIF2AK2,RELA,FASN,BAIAP2,RPTOR,CPEB1,ADAM23,MAP4K4,RHBDD1,IGFBP5,XRCC5,MPC2,EPRS,ATF3,MRC1,NR4A2,TOR1A,NMI,LRP2,TRIM44,BMP2,ZB…
cellular component biogenesis	0.0288	2846	993	175	6.1	BP	KAT2B,PCNT,SRR,KPNB1,NACC1,PSMC3,ANGPTL4,DAXX,IKZF4,MCM2,CALR,AQP1,LETM1,PRKACA,FBLIM1,PPP2R1A,CAV1,MID1IP1,CLSTN3,RPS18,BMP7,FUZ,MLKL,ABCA1,BIK,EXOSC10,SRSF1,ATP6V0A1,SGK1,ARG1,MICU1,CABIN1,1810043G02RIK,HSPA4,PSMC5,PECAM1,OCLN,HMGCR,HACL1,CHRNA2,C9,NDUFB9,CLDN1,IL1RAP,PLEC,CEP97,HRG,APP,EIF2AK2,RPS14,ATG2A,HPS1,CUTC,NDUFB8,RPS24,PTPRJ,BAIAP2,FARP1,TK1,CPEB1,PARD3,ACADL,XRCC5,FARSB,NFASC,AHCTF1,…
localization	1.46e-06	5661	993	341	6	BP	TOM1L2,VPREB3,SNAPIN,S100A6,LGALS9,PCNT,SP1,KPNB1,ERGIC1,DDT,IL16,SMO,SLC25A1,CALR,MMD,PHB2,AQP1,LETM1,PRKACA,ATP4A,TOMM40L,PRG4,SUSD2,SLC5A6,CAV1,CLSTN3,BMP7,RARRES2,DMAP1,SLC3A2,PLIN5,FUZ,SLC41A1,CLIC3,SLC25A13,ABCA1,STEAP2,MAPKAPK2,NUP50,EXOSC10,VPS53,SGK2,SRSF1,ATP5G3,SLC22A5,SLC25A22,ATP6V0A1,UBXN6,LRP11,SGK1,ARG1,CRY1,SLC16A7,MICU1,AVPR1A,SLC1A4,SLC36A1,HSPA4,IGFBP3,SREBF1,NBAS,NCOA1,PECAM1…
response to stress	0.0199	3552	993	212	6	BP	LGALS9,SP1,DDT,SMO,PSMC3,ANGPTL4,DAXX,CALR,PHB2,AQP1,NDRG1,PRKACA,CAV1,GPRC5B,RARRES2,DMAP1,RDM1,RPA3,DNAJB9,ABCA1,MAPKAPK2,DHX58,PDK4,UBXN6,LRP11,SGK1,ARG1,CRY1,AVPR1A,1810043G02RIK,TNIP1,BTG2,SREBF1,PXDN,PSMC5,PECAM1,NR1D1,STAT5B,FOS,TRAF3,WRNIP1,TERT,XRCC4,HMGCR,DHFR,ACOX2,PLAU,RNASEH2B,BNIP3L,PPARA,RANGAP1,SREBF2,CLDN1,IL1RAP,HRG,APP,RCAN1,PARP3,TFF3,CBS,EIF2AK2,LIPA,RELA,TRIM8,CPEB1,PARD3,PD…
metabolic process	3.52e-17	11180	993	647	5.8	BP	NARF,SCPEP1,KAT2B,SNAPIN,LGALS9,SP1,SRR,CYP51,STK38L,DDT,IL16,SMO,CAPNS1,NACC1,PSMC3,ANGPTL4,DAXX,HLTF,IKZF4,MCM2,LIPE,FKBP11,RPS11,INMT,CYP17A1,CALR,MMD,PHB2,AQP1,PRKACA,POR,NR1I3,CS,RPS9,GCAT,ELOVL1,MVD,PPP2R1A,CAV1,MID1IP1,CARHSP1,RPS18,GPRC5B,BMP7,RARRES2,DMAP1,KDSR,SLC3A2,RDM1,WNT2,PLIN5,FUZ,MED15,RPA3,RPS5,GFOD2,ATRAID,ST3GAL1,DNAJB9,SLC25A13,ABCA1,CLPX,STEAP2,HSD11B1,LONRF3,MAPKAPK2,CMAH,T…
small molecule binding	5.99e-09	2584	993	191	7.4	MF	SRR,STK38L,PSMC3,HLTF,MCM2,MYO9B,PRKACA,POR,ATP4A,GCAT,MVD,MLKL,ABCA1,CLPX,HSD11B1,MAPKAPK2,TTLL12,EXOSC10,DHX58,SGK2,SLC22A5,PDK4,SGK1,CRY1,MKNK2,HSPA4,PSMC5,GALK1,ACLY,WRNIP1,ECI2,ACOT12,HMGCR,DHFR,ACOX2,HACL1,NADK2,SQLE,MYH9,EIF4A2,PIM1,CBS,EIF2AK2,STARD4,RBP4,FASN,PI4K2A,AATK,SIRT3,TALDO1,TK1,ARL10,ACADL,MAP4K4,XRCC5,TUBA4A,FARSB,AGXT,SCLY,EPRS,MRC1,NEK6,PKN3,TOR1B,TOR1A,KYNU,ABCA2,ABCB11,UBE…
organelle membrane	1.05e-07	2364	993	174	7.4	CC	SNAPIN,KPNB1,CYP51,ERGIC1,SMO,SLC25A1,MMD,PHB2,AQP1,NDRG1,LETM1,TOMM40L,GCAT,SLC5A6,CAV1,CLSTN3,ATRAID,ST3GAL1,SLC25A13,CLPX,STEAP2,HSD11B1,NUP50,BIK,VPS53,ATP5G3,SLC25A22,ATP6V0A1,PDK4,UBXN6,CYB561,RTN4IP1,ARG1,MICU1,SLC36A1,SREBF1,RNF144A,SLC25A29,2010107E04RIK,SLC25A48,HMGCR,AP3M1,BNIP3L,SQLE,NDUFB9,RANGAP1,SREBF2,CYC1,ST3GAL6,SYNJ2,CYP39A1,SLC25A45,GSTO1,PI4K2A,NDUFB8,SIRT3,ATP5C1,ACADL,MFF,T…
cellular protein metabolic process	0.00223	4814	993	281	5.8	BP	SCPEP1,KAT2B,LGALS9,STK38L,DDT,PSMC3,DAXX,HLTF,FKBP11,RPS11,CALR,MMD,PHB2,AQP1,PRKACA,POR,RPS9,PPP2R1A,CAV1,RPS18,GPRC5B,BMP7,RARRES2,DMAP1,FUZ,RPS5,ATRAID,ST3GAL1,DNAJB9,ABCA1,CLPX,LONRF3,MAPKAPK2,TTLL12,SGK2,PDK4,UBXN6,SGK1,CRY1,MKNK2,CABIN1,TNIP1,BTG2,IGFBP3,SREBF1,RNF144A,NCOA1,PSMC5,PECAM1,MIF4GD,NR1D1,GPLD1,NSD1,TERT,HMGCR,DHFR,BNIP3L,DCAF11,L3MBTL2,TAB1,MYH9,PMM2,ST3GAL6,EHHADH,HRG,EIF4A2,…
positive regulation of biological process	0.0055	5662	993	320	5.7	BP	KAT2B,LGALS9,PCNT,SP1,DDT,IL16,SMO,NACC1,PSMC3,ANGPTL4,DAXX,HLTF,IKZF4,CYP17A1,CALR,MMD,PHB2,AQP1,PRKACA,POR,NR1I3,RPS9,MVD,PPP2R1A,CAV1,MID1IP1,CLSTN3,GPRC5B,BMP7,RARRES2,DMAP1,WNT2,PLIN5,FUZ,ATRAID,ABCA1,CLPX,LONRF3,MAPKAPK2,BIK,DHX58,SGK2,SRSF1,SLC22A5,PELP1,E2F2,RSPO3,SGK1,ARG1,AVPR1A,NFYB,TNIP1,BTG2,IGFBP3,SREBF1,NAMPT,NBAS,RNF144A,NCOA1,PSMC5,PECAM1,NR1D1,STAT5B,FOS,TRAF3,GPLD1,ID4,NSD1,TER…
drug binding	3.34e-05	1773	993	131	7.4	MF	SRR,STK38L,SMO,PSMC3,HLTF,MCM2,FKBP11,MYO9B,PRKACA,ATP4A,GCAT,MVD,MLKL,ABCA1,CLPX,MAPKAPK2,TTLL12,DHX58,SGK2,SLC22A5,PDK4,SGK1,MKNK2,HSPA4,NAMPT,PSMC5,GALK1,ACLY,WRNIP1,ACOT12,DHFR,CHRNA2,NADK2,PPARA,MYH9,NR1I2,EIF4A2,PIM1,CBS,EIF2AK2,FASN,PI4K2A,AATK,TK1,MAP4K4,XRCC5,FARSB,AGXT,SCLY,EPRS,NEK6,PKN3,TOR1B,TOR1A,KYNU,ABCA2,ABCB11,LRP2,UBE2L6,ITPKA,SLC27A2,ATP9A,PMVK,NTRK1,CTH,EPHA7,VCP,CYP4B1,PSMC2…
multicellular organism development	0.0146	5023	993	286	5.7	BP	KAT2B,SNAPIN,LGALS9,SP1,SRR,SMO,PSMC3,ANGPTL4,MCM2,CALR,MMD,PHB2,AQP1,NDRG1,PRKACA,POR,TBCB,CAV1,CLSTN3,GPRC5B,BMP7,RARRES2,WNT2,FUZ,ATRAID,DNAJB9,HSD11B1,MAPKAPK2,NUP50,BIK,MAFK,SRSF1,SLC22A5,E2F2,RSPO3,SGK1,ARG1,AVPR1A,MKNK2,BTG2,SREBF1,NCOA1,PECAM1,STAT5B,FOS,GPLD1,ID4,TERT,HMGCR,DHFR,PLAU,RNASEH2B,PPARA,TAB1,MYH9,CLDN1,IL1RAP,TYMP,ARSA,HRG,APP,RCAN1,FOXP4,PIM1,CBS,EIF2AK2,SPATA24,SLC23A1,LTB,…
organelle subcompartment	0.00239	1427	993	104	7.3	CC	SNAPIN,KPNB1,CYP51,ERGIC1,CALR,POR,ELOVL1,CAV1,CLSTN3,KDSR,ST3GAL1,STEAP2,HSD11B1,VPS53,SGK1,SREBF1,FDFT1,SSR1,HMGCR,SQLE,SREBF2,ST3GAL6,PIGX,CYP39A1,FADS3,PI4K2A,RHBDD1,COPA,TOR1A,ABCB11,HSD17B12,PEX16,SLC27A2,ATP9A,CYP2U1,VCP,ST3GAL3,CYP4B1,EXTL1,ABCB1B,FAM69A,CUX1,NAT8,TMCC1,TNFRSF1A,SLC27A5,NOX4,RAB30,CDIPT,ACER3,STX4A,ANKS4B,NSDHL,MSMO1,SC5D,ST3GAL4,BACE1,PARP16,ACPP,LSS,DNM2,FNDC3A,TMEM5,RP…
developmental process	0.00527	5928	993	333	5.6	BP	KAT2B,SNAPIN,LGALS9,SP1,SRR,SMO,PSMC3,ANGPTL4,MCM2,CALR,MMD,PHB2,AQP1,NDRG1,PRKACA,POR,TBCB,FBLIM1,PPP2R1A,CAV1,CLSTN3,GPRC5B,BMP7,RARRES2,WNT2,FUZ,MED15,ATRAID,DNAJB9,HSD11B1,MAPKAPK2,NUP50,BIK,MAFK,SRSF1,SLC22A5,E2F2,RSPO3,SGK1,ARG1,AVPR1A,MKNK2,1810043G02RIK,BTG2,IGFBP3,SREBF1,NCOA1,PECAM1,NR1D1,STAT5B,FOS,GPLD1,ID4,TERT,HMGCR,DHFR,PLAU,RNASEH2B,PPARA,L3MBTL2,TAB1,MYH9,CLDN1,IL1RAP,TYMP,ARSA,H…
positive regulation of cellular process	0.0271	5102	993	288	5.6	BP	KAT2B,LGALS9,SP1,DDT,SMO,NACC1,PSMC3,DAXX,HLTF,IKZF4,CYP17A1,CALR,MMD,PHB2,AQP1,PRKACA,POR,NR1I3,RPS9,MVD,PPP2R1A,CAV1,MID1IP1,CLSTN3,GPRC5B,BMP7,RARRES2,WNT2,PLIN5,FUZ,ATRAID,CLPX,LONRF3,MAPKAPK2,BIK,DHX58,SRSF1,PELP1,E2F2,RSPO3,SGK1,ARG1,AVPR1A,NFYB,TNIP1,BTG2,IGFBP3,SREBF1,NAMPT,RNF144A,NCOA1,PSMC5,PECAM1,NR1D1,STAT5B,FOS,GPLD1,ID4,NSD1,TERT,HMGCR,ACOX2,PLAU,RNASEH2B,TSC22D1,BNIP3L,PPARA,L3MBT…
response to chemical	0.0431	5234	993	293	5.6	BP	KAT2B,LGALS9,SP1,SRR,DDT,IL16,SMO,PSMC3,DAXX,MCM2,INMT,SLC25A1,CALR,PHB2,AQP1,NDRG1,PRKACA,POR,NR1I3,SLC5A6,CAV1,BMP7,RARRES2,DMAP1,SLC3A2,WNT2,FUZ,SLC41A1,DNAJB9,SLC25A13,ABCA1,STEAP2,MAPKAPK2,SLC22A5,PELP1,SLC25A22,PDK4,UBXN6,LRP11,SGK1,ARG1,CRY1,AVPR1A,MKNK2,NFYB,SLC36A1,TNIP1,BTG2,SREBF1,NAMPT,NCOA1,PXDN,PSMC5,NR1D1,STAT5B,FOS,SLC25A29,TRAF3,GPLD1,AAED1,TERT,XRCC4,OCLN,HMGCR,DHFR,CHRNA2,BNIP3…
response to organic substance	3.47e-10	3131	993	226	7.2	BP	KAT2B,LGALS9,SP1,SRR,SMO,PSMC3,DAXX,MCM2,CALR,PHB2,AQP1,PRKACA,POR,NR1I3,CAV1,BMP7,RARRES2,DMAP1,SLC3A2,WNT2,FUZ,DNAJB9,ABCA1,STEAP2,MAPKAPK2,PDK4,UBXN6,SGK1,ARG1,CRY1,AVPR1A,NFYB,TNIP1,BTG2,SREBF1,NAMPT,NCOA1,PSMC5,NR1D1,STAT5B,FOS,TRAF3,GPLD1,TERT,OCLN,HMGCR,DHFR,SQLE,PPARA,RANGAP1,TAB1,SREBF2,CLDN1,IL1RAP,CYC1,ARSA,ST3GAL6,NR1I2,HRG,EIF4A2,APP,KRT18,PIM1,CBS,EIF2AK2,RELA,RBP4,DNTT,FASN,CPN1,BA…
organelle	8.16e-21	11903	993	691	5.8	CC	NARF,HDDC2,KAT2B,VPREB3,SNAPIN,S100A6,LGALS9,PCNT,SP1,KPNB1,CYP51,ERGIC1,STK38L,GRAMD3,IL16,SMO,NACC1,PSMC3,DAXX,HLTF,IKZF4,MCM2,LIPE,RABAC1,RPS11,SLC25A1,CYP17A1,CALR,MMD,PHB2,AQP1,MYO9B,NDRG1,SPC25,LETM1,PRKACA,POR,TOMM40L,NR1I3,CS,TBCB,FBLIM1,RPS9,GCAT,ELOVL1,MVD,SLC5A6,PPP2R1A,FANCE,CAV1,MID1IP1,CLSTN3,CARHSP1,RPS18,GPRC5B,BMP7,DMAP1,OIT3,KDSR,SLC3A2,IFI35,RDM1,PLIN5,FUZ,MED15,RPA3,RPS5,TANGO…
cellular catabolic process	0.000125	1813	993	131	7.2	BP	SCPEP1,SNAPIN,PSMC3,LIPE,PRKACA,POR,GCAT,CARHSP1,PLIN5,ATRAID,DNAJB9,CLPX,HSD11B1,LONRF3,MAPKAPK2,EXOSC10,ATP6V0A1,UBXN6,ARG1,BTG2,IGFBP3,SREBF1,NBAS,RNF144A,PXDN,PSMC5,GALK1,NR1D1,GPLD1,ECI2,ACOX2,HACL1,RNASEH2B,BNIP3L,PPARA,ARSA,NR1I2,EHHADH,ACAT2,CYP39A1,CBS,ALDH1A7,ATG2A,CAPN1,TRIM8,GSTO1,CPN1,ABHD6,PAOX,ACADL,RHBDD1,AGXT,SCLY,TOR1A,KYNU,PSMD14,UBE2L6,SORD,SLC27A2,LPIN3,AHCY,GSTM4,RAD23B,UBAP…
membrane-enclosed lumen	0.0477	4140	993	239	5.8	CC	NARF,KAT2B,SP1,KPNB1,ERGIC1,IL16,NACC1,PSMC3,DAXX,HLTF,IKZF4,MCM2,CALR,PHB2,PRKACA,NR1I3,CS,FBLIM1,RPS9,GCAT,MVD,FANCE,GPRC5B,DMAP1,RDM1,MED15,RPA3,DNAJB9,CLIC3,CLPX,MAPKAPK2,NUP50,EXOSC10,SGK2,MAFK,SRSF1,PELP1,ATP6V0A1,PDK4,SGK1,CRY1,MICU1,MKNK2,CABIN1,NFYB,TNIP1,IGFBP3,SREBF1,NAMPT,NCOA1,PSMC5,MIF4GD,TEN1,NR1D1,ACLY,STAT5B,FOS,WRNIP1,ECI2,TERT,XRCC4,RNASEH2B,BNIP3L,MBNL2,DCAF11,PPARA,RANGAP1,TA…
cell	2.32e-11	17095	993	866	5.1	CC	NARF,SCPEP1,HDDC2,TOM1L2,KAT2B,VPREB3,SNAPIN,S100A6,LGALS9,PCNT,SP1,SRR,KPNB1,CYP51,ERGIC1,STK38L,DDT,GRAMD3,IL16,SMO,CAPNS1,NACC1,ESAM,PSMC3,DAXX,HLTF,IKZF4,NUDT14,MCM2,LIPE,FKBP11,RABAC1,RPS11,INMT,SLC25A1,CYP17A1,CALR,MMD,PHB2,AQP1,MYO9B,NDRG1,SPC25,LETM1,PRKACA,POR,TOMM40L,NR1I3,CS,TBCB,FBLIM1,RPS9,SUSD2,GCAT,ELOVL1,MVD,SLC5A6,PPP2R1A,FANCE,CAV1,MID1IP1,CLSTN3,CARHSP1,RPS18,GPRC5B,DMAP1,OIT3,…
nucleoside phosphate binding	1.53e-05	2194	993	156	7.1	MF	SRR,STK38L,PSMC3,HLTF,MCM2,MYO9B,PRKACA,POR,ATP4A,MVD,MLKL,ABCA1,CLPX,HSD11B1,MAPKAPK2,TTLL12,EXOSC10,DHX58,SGK2,SLC22A5,PDK4,SGK1,CRY1,MKNK2,HSPA4,PSMC5,GALK1,ACLY,WRNIP1,ECI2,ACOT12,HMGCR,DHFR,ACOX2,NADK2,SQLE,MYH9,EIF4A2,PIM1,EIF2AK2,FASN,PI4K2A,AATK,SIRT3,TK1,ARL10,ACADL,MAP4K4,XRCC5,TUBA4A,FARSB,EPRS,NEK6,PKN3,TOR1B,TOR1A,ABCA2,ABCB11,UBE2L6,SORD,ITPKA,SLC27A2,ATP9A,AHCY,PMVK,NTRK1,EPHA7,VCP…
catabolic process	6.57e-05	2043	993	145	7.1	BP	SCPEP1,SNAPIN,PSMC3,LIPE,PRKACA,POR,GCAT,CARHSP1,RARRES2,PLIN5,ATRAID,DNAJB9,CLPX,HSD11B1,LONRF3,MAPKAPK2,EXOSC10,ATP6V0A1,UBXN6,ARG1,BTG2,IGFBP3,SREBF1,NBAS,RNF144A,PXDN,PSMC5,GALK1,NR1D1,GPLD1,ECI2,ACOX2,HACL1,RNASEH2B,BNIP3L,PPARA,ARSA,NR1I2,EHHADH,SYNJ2,ACAT2,CYP39A1,CBS,IMPA2,ALDH1A7,ATG2A,LIPA,RELA,CAPN1,TRIM8,GSTO1,CPN1,ABHD6,PAOX,ACADL,RHBDD1,AGXT,SCLY,PTER,TOR1A,KYNU,PSMD14,UBE2L6,SORD,S…
organic substance catabolic process	0.000675	1724	993	123	7.1	BP	SCPEP1,PSMC3,LIPE,PRKACA,GCAT,CARHSP1,RARRES2,PLIN5,ATRAID,DNAJB9,CLPX,HSD11B1,LONRF3,MAPKAPK2,EXOSC10,UBXN6,ARG1,BTG2,IGFBP3,NBAS,RNF144A,PSMC5,GALK1,NR1D1,GPLD1,ECI2,ACOX2,HACL1,RNASEH2B,BNIP3L,PPARA,EHHADH,SYNJ2,ACAT2,CYP39A1,CBS,IMPA2,ALDH1A7,LIPA,RELA,CAPN1,CPN1,ABHD6,PAOX,ACADL,RHBDD1,AGXT,SCLY,TOR1A,KYNU,PSMD14,UBE2L6,SORD,SLC27A2,LPIN3,AHCY,RAD23B,UBAP1,VCP,USP24,GALE,CYP4A31,SESN2,PSMC2,…
intracellular part	3.99e-34	13275	993	785	5.9	CC	NARF,SCPEP1,HDDC2,KAT2B,VPREB3,SNAPIN,S100A6,LGALS9,PCNT,SP1,SRR,KPNB1,CYP51,ERGIC1,STK38L,DDT,GRAMD3,IL16,SMO,CAPNS1,NACC1,PSMC3,DAXX,HLTF,IKZF4,NUDT14,MCM2,LIPE,FKBP11,RABAC1,RPS11,INMT,SLC25A1,CYP17A1,CALR,MMD,PHB2,AQP1,MYO9B,NDRG1,SPC25,LETM1,PRKACA,POR,TOMM40L,NR1I3,CS,TBCB,FBLIM1,RPS9,GCAT,ELOVL1,MVD,PPP2R1A,FANCE,CAV1,MID1IP1,CLSTN3,CARHSP1,RPS18,GPRC5B,DMAP1,OIT3,KDSR,SLC3A2,IFI35,RDM1,WN…
cytoplasm	6.77e-41	10422	993	684	6.6	CC	SCPEP1,HDDC2,KAT2B,VPREB3,SNAPIN,S100A6,LGALS9,PCNT,SP1,SRR,KPNB1,CYP51,ERGIC1,STK38L,DDT,GRAMD3,IL16,SMO,CAPNS1,NACC1,PSMC3,HLTF,NUDT14,MCM2,LIPE,FKBP11,RABAC1,RPS11,INMT,SLC25A1,CYP17A1,CALR,MMD,PHB2,AQP1,MYO9B,NDRG1,SPC25,LETM1,PRKACA,POR,TOMM40L,NR1I3,CS,TBCB,FBLIM1,RPS9,GCAT,ELOVL1,MVD,PPP2R1A,CAV1,MID1IP1,CLSTN3,CARHSP1,RPS18,GPRC5B,DMAP1,KDSR,SLC3A2,RDM1,WNT2,PLIN5,FUZ,MED15,MLKL,RPS5,TANG…
cytoplasmic part	1e-32	8155	993	559	6.9	CC	SCPEP1,HDDC2,KAT2B,VPREB3,SNAPIN,S100A6,LGALS9,PCNT,KPNB1,CYP51,ERGIC1,STK38L,GRAMD3,IL16,SMO,CAPNS1,PSMC3,LIPE,RABAC1,RPS11,INMT,SLC25A1,CYP17A1,CALR,MMD,PHB2,AQP1,MYO9B,NDRG1,SPC25,LETM1,PRKACA,POR,TOMM40L,NR1I3,CS,TBCB,FBLIM1,RPS9,GCAT,ELOVL1,MVD,PPP2R1A,CAV1,MID1IP1,CLSTN3,CARHSP1,RPS18,GPRC5B,DMAP1,KDSR,SLC3A2,RDM1,PLIN5,RPS5,TANGO2,ATRAID,ST3GAL1,DNAJB9,SLC25A13,ABCA1,CLPX,STEAP2,GATSL2,HSD…
cytosol	8.9e-18	3440	993	269	7.8	CC	SCPEP1,KAT2B,SNAPIN,S100A6,LGALS9,PCNT,KPNB1,STK38L,IL16,CAPNS1,PSMC3,LIPE,RPS11,INMT,CALR,MYO9B,NDRG1,SPC25,PRKACA,NR1I3,TBCB,RPS9,MVD,PPP2R1A,CAV1,MID1IP1,CARHSP1,RPS18,GPRC5B,DMAP1,SLC3A2,RDM1,PLIN5,RPS5,CLPX,STEAP2,GATSL2,CYTH1,EXOSC10,VPS53,ATP6V0A1,UBXN6,SGK1,CRY1,CABIN1,HSPA4,TNIP1,NAMPT,NCOA1,PSMC5,MIF4GD,ACLY,STAT5B,FOS,TERT,XRCC4,ACOT12,DHFR,ACOX2,BNIP3L,C9,RANGAP1,TAB1,MYH9,PLEC,CEP97,…
cytosolic part	1.5e-05	256	993	35	13.7	CC	SNAPIN,PSMC3,RPS11,RPS9,RPS18,RPS5,PSMC5,RPS14,PI4K2A,HPS1,RPS24,PSMD14,RPS20,CASP9,RPL22,PSMC4,RPS29,RPS16,RPL10A,FAU,RPL12,RPL22L1,RPL9,RPS8,RPS23,RPS27RT,IDE,RPL32,RPS7,RPL35,RPS28,RPL13A,RPL39,RPS27,RPL41
intracellular organelle	3.12e-21	11660	993	682	5.8	CC	NARF,HDDC2,KAT2B,VPREB3,SNAPIN,S100A6,LGALS9,PCNT,SP1,KPNB1,CYP51,ERGIC1,STK38L,GRAMD3,IL16,SMO,NACC1,PSMC3,DAXX,HLTF,IKZF4,MCM2,LIPE,RABAC1,RPS11,SLC25A1,CYP17A1,CALR,MMD,PHB2,AQP1,MYO9B,NDRG1,SPC25,LETM1,PRKACA,POR,TOMM40L,NR1I3,CS,TBCB,FBLIM1,RPS9,GCAT,ELOVL1,MVD,PPP2R1A,FANCE,CAV1,MID1IP1,CLSTN3,CARHSP1,RPS18,GPRC5B,DMAP1,OIT3,KDSR,SLC3A2,IFI35,RDM1,PLIN5,FUZ,MED15,RPA3,RPS5,TANGO2,ATRAID,ST3…
intracellular membrane-bounded organelle	4.15e-18	9957	993	596	6	CC	NARF,HDDC2,KAT2B,VPREB3,SNAPIN,S100A6,LGALS9,SP1,KPNB1,CYP51,ERGIC1,IL16,SMO,NACC1,PSMC3,DAXX,HLTF,IKZF4,MCM2,LIPE,RABAC1,SLC25A1,CYP17A1,CALR,MMD,PHB2,AQP1,NDRG1,SPC25,LETM1,PRKACA,POR,TOMM40L,NR1I3,CS,FBLIM1,RPS9,GCAT,ELOVL1,MVD,FANCE,CAV1,MID1IP1,CLSTN3,RPS18,GPRC5B,DMAP1,OIT3,KDSR,SLC3A2,IFI35,RDM1,PLIN5,MED15,RPA3,TANGO2,ATRAID,ST3GAL1,DNAJB9,CLIC3,SLC25A13,ABCA1,CLPX,STEAP2,HSD11B1,MAPKAPK2…
microbody	8.46e-05	144	993	24	16.7	CC	MVD,CAV1,ECI2,HMGCR,ACOX2,HACL1,EHHADH,PAOX,MFF,AGXT,PEX16,SLC27A2,PMVK,IDH2,NUDT7,DECR2,MVK,LACC1,8430408G22RIK,ACOT4,IDE,FDPS,ACNAT1,MLYCD
peroxisome	8.46e-05	144	993	24	16.7	CC	MVD,CAV1,ECI2,HMGCR,ACOX2,HACL1,EHHADH,PAOX,MFF,AGXT,PEX16,SLC27A2,PMVK,IDH2,NUDT7,DECR2,MVK,LACC1,8430408G22RIK,ACOT4,IDE,FDPS,ACNAT1,MLYCD
mitochondrion	6.18e-09	1754	993	143	8.2	CC	HDDC2,LIPE,SLC25A1,CYP17A1,PHB2,LETM1,PRKACA,POR,TOMM40L,CS,GCAT,CAV1,PLIN5,SLC25A13,CLPX,BIK,ATP5G3,SLC25A22,PDK4,RTN4IP1,SGK1,ARG1,CRY1,MICU1,1810043G02RIK,ACLY,SLC25A29,2010107E04RIK,ECI2,SLC25A48,TERT,DHFR,BNIP3L,NADK2,NDUFB9,SREBF2,CYC1,EHHADH,SYNJ2,ACAT2,RPS14,SLC25A45,CAPN1,FASN,PI4K2A,NDUFB8,ABHD6,SIRT3,ATP5C1,ACADL,RHBDD1,MFF,AGXT,MPC2,KYNU,DYNC1I2,GATM,SORD,CRLS1,SLC27A2,SESN2,CASP9,ABC…
regulation of cell death	0.0012	1707	993	121	7.1	BP	SMO,ANGPTL4,DAXX,PHB2,AQP1,POR,PPP2R1A,CAV1,BMP7,BIK,SGK2,PDK4,SGK1,CABIN1,BTG2,IGFBP3,NCOA1,TMIGD1,STAT5B,FOS,TRAF3,GPLD1,TERT,HMGCR,ACOX2,TSC22D1,BNIP3L,PPARA,HRG,KRT18,PIM1,CBS,EIF2AK2,RELA,SLC40A1,MAP4K4,RHBDD1,MFF,ATF3,NEK6,FAM129B,NR4A2,BMP2,ZC3H8,ADAR,LMNA,NTRK1,GCLM,CTH,EPHA7,VCP,CASP9,SLC35F6,ALB,RILPL1,ASNS,NAT8,CIDEC,ATG7,LTBR,TNFRSF1A,NOX4,ZFAND6,LCMT1,STX4A,PDILT,FGFR1,DUS2,AARS,BIRC…
ribonucleotide binding	0.00179	1956	993	134	6.9	MF	SRR,STK38L,PSMC3,HLTF,MCM2,MYO9B,PRKACA,POR,ATP4A,MVD,MLKL,ABCA1,CLPX,MAPKAPK2,TTLL12,DHX58,SGK2,SLC22A5,PDK4,SGK1,MKNK2,HSPA4,PSMC5,GALK1,ACLY,WRNIP1,ECI2,ACOT12,NADK2,MYH9,EIF4A2,PIM1,EIF2AK2,PI4K2A,AATK,TK1,ARL10,ACADL,MAP4K4,XRCC5,TUBA4A,FARSB,EPRS,NEK6,PKN3,TOR1B,TOR1A,ABCA2,ABCB11,UBE2L6,ITPKA,SLC27A2,ATP9A,PMVK,NTRK1,EPHA7,VCP,PDE4B,PSMC2,ABCB1B,ABCB8,DCK,MMAB,ACTB,RASL11A,ASNS,ABCG2,SLC27…
endoplasmic reticulum	1.36e-06	1599	993	126	7.9	CC	VPREB3,KPNB1,CYP51,ERGIC1,CYP17A1,CALR,POR,ELOVL1,CAV1,CLSTN3,KDSR,DNAJB9,HSD11B1,CMAH,SGK1,SLC36A1,SREBF1,NBAS,ARSG,PXDN,FOS,FDFT1,SSR1,HMGCR,BNIP3L,SQLE,SREBF2,ARSA,APP,PIGX,CYP39A1,FADS3,NDUFB8,BAIAP2,RHBDD1,HSD17B7,TOR1B,TOR1A,LRP2,HSD17B12,PEX16,SLC27A2,CYP2U1,VCP,GPX7,CYP4B1,TMEM50A,EXTL1,CLOCK,FAM69A,ALB,AHCYL2,NAT8,CNBP,TMCC1,CIDEC,SLC27A5,NOX4,CDIPT,ACER3,ANKS4B,PDILT,NSDHL,RNF128,ATP11A…
organelle part	3.6e-11	8171	993	485	5.9	CC	NARF,KAT2B,SNAPIN,S100A6,PCNT,SP1,KPNB1,CYP51,ERGIC1,GRAMD3,IL16,SMO,NACC1,PSMC3,DAXX,HLTF,IKZF4,MCM2,RPS11,SLC25A1,CALR,MMD,PHB2,AQP1,MYO9B,NDRG1,SPC25,LETM1,PRKACA,POR,TOMM40L,NR1I3,CS,TBCB,FBLIM1,RPS9,GCAT,ELOVL1,MVD,SLC5A6,PPP2R1A,FANCE,CAV1,MID1IP1,CLSTN3,RPS18,GPRC5B,DMAP1,OIT3,KDSR,RDM1,MED15,RPA3,RPS5,ATRAID,ST3GAL1,DNAJB9,CLIC3,SLC25A13,CLPX,STEAP2,HSD11B1,MAPKAPK2,NUP50,BIK,EXOSC10,VPS5…
regulation of programmed cell death	0.0206	1570	993	108	6.9	BP	SMO,ANGPTL4,PHB2,AQP1,POR,PPP2R1A,CAV1,BMP7,BIK,SGK2,PDK4,SGK1,BTG2,IGFBP3,NCOA1,TMIGD1,STAT5B,TRAF3,GPLD1,TERT,HMGCR,TSC22D1,BNIP3L,HRG,KRT18,PIM1,CBS,EIF2AK2,RELA,SLC40A1,MAP4K4,RHBDD1,MFF,ATF3,NEK6,FAM129B,NR4A2,BMP2,ZC3H8,ADAR,LMNA,NTRK1,GCLM,CTH,EPHA7,VCP,CASP9,SLC35F6,ALB,ASNS,NAT8,CIDEC,ATG7,LTBR,TNFRSF1A,NOX4,ZFAND6,LCMT1,STX4A,PDILT,FGFR1,AARS,BIRC3,ETS1,SMARCA4,KANK2,CTSH,ANK2,RPS29,SIG…
carbohydrate derivative binding	0.000357	2228	993	152	6.8	MF	LGALS9,SRR,STK38L,PSMC3,HLTF,MCM2,MYO9B,PRKACA,POR,ATP4A,MVD,BMP7,MLKL,ABCA1,CLPX,MAPKAPK2,TTLL12,DHX58,SGK2,SLC22A5,PDK4,RSPO3,SGK1,MKNK2,HSPA4,PSMC5,GALK1,ACLY,WRNIP1,ECI2,ACOT12,NADK2,MYH9,HRG,EIF4A2,APP,PIM1,EIF2AK2,PI4K2A,AATK,TK1,ARL10,ACADL,MAP4K4,XRCC5,TUBA4A,FARSB,EPRS,NEK6,PKN3,TOR1B,TOR1A,ABCA2,ABCB11,UBE2L6,HSD17B12,ITPKA,SLC27A2,ATP9A,PMVK,NTRK1,EPHA7,VCP,PDE4B,PSMC2,RPL22,ABCB1B,ABC…
anion binding	0.00012	2782	993	184	6.6	MF	SRR,STK38L,PSMC3,HLTF,MCM2,MYO9B,PRKACA,POR,ATP4A,GCAT,MVD,BMP7,MLKL,ABCA1,CLPX,MAPKAPK2,TTLL12,DHX58,SGK2,SLC22A5,PDK4,RSPO3,SGK1,MKNK2,HSPA4,PSMC5,GALK1,ACLY,WRNIP1,ECI2,ACOT12,HMGCR,DHFR,ACOX2,HACL1,NADK2,SQLE,MYH9,HRG,EIF4A2,APP,PIM1,CBS,EIF2AK2,RELA,FASN,PI4K2A,AATK,SIRT3,TK1,PARD3,ARL10,ACADL,MAP4K4,XRCC5,TUBA4A,FARSB,AGXT,SCLY,EPRS,NEK6,PKN3,TOR1B,TOR1A,KYNU,ABCA2,ABCB11,UBE2L6,HSD17B12,IT…
macromolecule localization	0.000496	2687	993	176	6.6	BP	TOM1L2,VPREB3,SNAPIN,LGALS9,PCNT,KPNB1,SMO,CALR,MMD,PHB2,PRKACA,TOMM40L,CAV1,CLSTN3,BMP7,DMAP1,PLIN5,FUZ,ABCA1,NUP50,EXOSC10,VPS53,SRSF1,SGK1,CRY1,HSPA4,IGFBP3,SREBF1,NR1D1,STAT5B,ID4,SSR1,TERT,HMGCR,AP3M1,BNIP3L,PPARA,RANGAP1,MYH9,SREBF2,IL1RAP,GPIHBP1,PMM2,KRT18,SLC10A2,PARP3,ACAT2,STARD4,RBP4,TRIM8,BAIAP2,SIRT3,CPEB1,PARD3,MAP4K4,RHBDD1,MFF,NFASC,AHCTF1,COPA,MPC2,EPRS,TOR1A,ABCA2,ABCB11,LRP2,P…
positive regulation of cellular biosynthetic process	0.0281	1820	993	121	6.6	BP	KAT2B,SP1,SMO,PSMC3,DAXX,HLTF,IKZF4,CYP17A1,POR,NR1I3,RPS9,MID1IP1,BMP7,WNT2,PLIN5,MAPKAPK2,PELP1,E2F2,AVPR1A,NFYB,TNIP1,SREBF1,NAMPT,NCOA1,PSMC5,NR1D1,STAT5B,FOS,ID4,NSD1,TERT,TSC22D1,PPARA,SREBF2,NR1I2,APP,NELFE,STARD4,LTB,RELA,PAIP1,PAOX,SIRT3,RPTOR,CPEB1,JADE1,SLC40A1,XRCC5,SLC45A3,DCAF6,ATF3,FAM129B,NR4A2,MED19,SP3,TRIM44,BMP2,ZC3H8,LPIN3,ZBTB7B,RORC,VCP,SESN2,CLOCK,TFEC,RASL11A,CNBP,ETV6,TN…
endoplasmic reticulum subcompartment	0.0106	884	993	70	7.9	CC	KPNB1,CYP51,ERGIC1,CALR,POR,ELOVL1,CAV1,CLSTN3,KDSR,HSD11B1,SGK1,SREBF1,FDFT1,SSR1,HMGCR,SQLE,SREBF2,PIGX,CYP39A1,FADS3,RHBDD1,TOR1A,HSD17B12,PEX16,SLC27A2,CYP2U1,VCP,CYP4B1,EXTL1,FAM69A,NAT8,TMCC1,SLC27A5,NOX4,CDIPT,ACER3,ANKS4B,NSDHL,MSMO1,SC5D,PARP16,LSS,RPS29,REEP6,TMTC2,SIGMAR1,PNPLA7,TAP1,TAPBPL,FMO2,FMO1,CYP2C37,ZC3H12A,SLC35G1,INSIG1,IRGM1,AGMO,TOR1AIP2,CYP2C50,CYP3A11,RETSAT,DHCR7,CYP4A1…
positive regulation of biosynthetic process	0.0311	1861	993	123	6.6	BP	KAT2B,SP1,SMO,PSMC3,DAXX,HLTF,IKZF4,CYP17A1,POR,NR1I3,RPS9,MID1IP1,BMP7,WNT2,PLIN5,MAPKAPK2,PELP1,E2F2,AVPR1A,NFYB,TNIP1,SREBF1,NAMPT,NCOA1,PSMC5,NR1D1,STAT5B,FOS,ID4,NSD1,TERT,TSC22D1,PPARA,SREBF2,NR1I2,APP,NELFE,STARD4,LTB,RELA,ABHD6,PAIP1,PAOX,SIRT3,RPTOR,CPEB1,JADE1,SLC40A1,XRCC5,SLC45A3,DCAF6,ATF3,FAM129B,NR4A2,MED19,SP3,TRIM44,BMP2,ZC3H8,LPIN3,ZBTB7B,RORC,VCP,SESN2,CLOCK,TFEC,RASL11A,CNBP,E…
positive regulation of metabolic process	6.22e-05	3286	993	212	6.5	BP	KAT2B,LGALS9,SP1,DDT,SMO,PSMC3,ANGPTL4,DAXX,HLTF,IKZF4,CYP17A1,CALR,MMD,PHB2,POR,NR1I3,RPS9,CAV1,MID1IP1,GPRC5B,BMP7,RARRES2,WNT2,PLIN5,FUZ,CLPX,LONRF3,MAPKAPK2,SRSF1,PELP1,E2F2,AVPR1A,NFYB,TNIP1,BTG2,IGFBP3,SREBF1,NAMPT,NBAS,RNF144A,NCOA1,PSMC5,PECAM1,NR1D1,STAT5B,FOS,GPLD1,ID4,NSD1,TERT,HMGCR,DHFR,PLAU,TSC22D1,BNIP3L,PPARA,L3MBTL2,TAB1,MYH9,SREBF2,NR1I2,APP,PARP3,EIF2AK2,NELFE,STARD4,LTB,RELA,T…
mitochondrial envelope	4.55e-06	678	993	67	9.9	CC	SLC25A1,PHB2,LETM1,TOMM40L,GCAT,SLC25A13,CLPX,BIK,ATP5G3,SLC25A22,PDK4,RTN4IP1,ARG1,MICU1,SLC25A29,2010107E04RIK,SLC25A48,BNIP3L,NDUFB9,CYC1,SYNJ2,SLC25A45,NDUFB8,SIRT3,ATP5C1,ACADL,MFF,MPC2,GATM,SORD,CRLS1,ABCB8,SLC25A33,MTHFD2L,IDH2,SLC25A15,CYB5B,REXO2,SLC25A20,DNM2,COX18,PNPLA7,TXNIP,UQCRFS1,ATP5L,TIMM8B,NDUFB10,ABCA8A,CHCHD7,IKBKE,NGRN,TIMM8A1,SLC25A47,2410015M20RIK,SLC25A44,ATP5K,COA6,CFL1,…
phosphorus metabolic process	0.000111	3062	993	199	6.5	BP	KAT2B,LGALS9,STK38L,DDT,DAXX,MMD,PHB2,AQP1,PRKACA,CS,ELOVL1,MVD,PPP2R1A,CAV1,GPRC5B,BMP7,RARRES2,ST3GAL1,SLC25A13,CLPX,HSD11B1,MAPKAPK2,CMAH,SGK2,ATP5G3,ATP6V0A1,PDK4,SGK1,CRY1,MKNK2,CABIN1,TNIP1,IGFBP3,NAMPT,PECAM1,GALK1,ACLY,FDFT1,GPLD1,NSD1,ACOT12,HMGCR,PLAU,RNASEH2B,NADK2,NDUFB9,PPARA,TAB1,CYC1,EHHADH,HRG,APP,RCAN1,SERINC2,PIGX,SYNJ2,PIM1,CBS,EIF2AK2,NELFE,IMPA2,FASN,PI4K2A,NDUFB8,ABHD6,PTPRJ…
biosynthetic process	6.21e-12	5762	993	371	6.4	BP	KAT2B,SP1,SRR,CYP51,DDT,IL16,SMO,NACC1,PSMC3,DAXX,HLTF,IKZF4,MCM2,LIPE,RPS11,CYP17A1,CALR,PHB2,AQP1,POR,NR1I3,RPS9,GCAT,ELOVL1,MVD,CAV1,MID1IP1,CARHSP1,RPS18,BMP7,DMAP1,KDSR,WNT2,PLIN5,MED15,RPA3,RPS5,ST3GAL1,SLC25A13,ABCA1,HSD11B1,MAPKAPK2,EXOSC10,MAFK,ATP5G3,PELP1,E2F2,ATP6V0A1,PDK4,ARG1,CRY1,AVPR1A,MKNK2,NFYB,TNIP1,BTG2,SREBF1,NAMPT,NCOA1,PSMC5,MIF4GD,GALK1,TEN1,NR1D1,ACLY,STAT5B,FOS,FDFT1,TRA…
organic substance biosynthetic process	2.6e-11	5675	993	364	6.4	BP	KAT2B,SP1,SRR,CYP51,DDT,IL16,SMO,NACC1,PSMC3,DAXX,HLTF,IKZF4,MCM2,LIPE,RPS11,CYP17A1,CALR,PHB2,AQP1,POR,NR1I3,RPS9,ELOVL1,MVD,CAV1,MID1IP1,CARHSP1,RPS18,BMP7,DMAP1,KDSR,WNT2,PLIN5,MED15,RPA3,RPS5,ST3GAL1,SLC25A13,ABCA1,HSD11B1,MAPKAPK2,EXOSC10,MAFK,ATP5G3,PELP1,E2F2,ATP6V0A1,PDK4,ARG1,CRY1,AVPR1A,MKNK2,NFYB,TNIP1,BTG2,SREBF1,NAMPT,NCOA1,PSMC5,MIF4GD,GALK1,TEN1,NR1D1,ACLY,STAT5B,FOS,FDFT1,TRAF3,ID…
mitochondrial inner membrane	0.000128	426	993	46	10.8	CC	SLC25A1,PHB2,LETM1,GCAT,SLC25A13,CLPX,ATP5G3,SLC25A22,PDK4,MICU1,SLC25A29,2010107E04RIK,SLC25A48,NDUFB9,CYC1,SLC25A45,NDUFB8,SIRT3,ATP5C1,MPC2,GATM,CRLS1,ABCB8,SLC25A33,MTHFD2L,IDH2,SLC25A15,CYB5B,SLC25A20,COX18,UQCRFS1,ATP5L,TIMM8B,NDUFB10,ABCA8A,TIMM8A1,SLC25A47,2410015M20RIK,SLC25A44,ATP5K,IMMP2L,UQCRH,NDUFB6,USMG5,MPST,COX7A1
nuclear outer membrane-endoplasmic reticulum membrane network	0.0103	900	993	71	7.9	CC	CYP51,ERGIC1,CALR,POR,ELOVL1,CAV1,CLSTN3,KDSR,HSD11B1,SGK1,SREBF1,FDFT1,SSR1,HMGCR,SQLE,SREBF2,PIGX,CYP39A1,FADS3,RHBDD1,TOR1A,HSD17B12,PEX16,SLC27A2,CYP2U1,VCP,CYP4B1,EXTL1,FAM69A,NAT8,TMCC1,SLC27A5,NOX4,CDIPT,ACER3,ANKS4B,NSDHL,MSMO1,SC5D,PARP16,LSS,RPS29,REEP6,TMTC2,SIGMAR1,PNPLA7,TAP1,TAPBPL,FMO2,FMO1,PIK3R1,CYP2C37,ZC3H12A,SLC35G1,INSIG1,IRGM1,AGMO,TOR1AIP2,CYP2C50,CYP3A11,RETSAT,DHCR7,CYP4A…
apical plasma membrane	0.0295	336	993	34	10.1	CC	AQP1,CAV1,SLC3A2,SLC22A5,SLC17A1,OCLN,CLDN1,PLEC,GPIHBP1,SLC10A2,SLC23A1,ACY3,CD55,ABCB11,LRP2,ATP6V0D2,MPDZ,CYP4A31,ABCB1B,ABCG2,NOX4,AQP8,STX4A,ANK2,GNAT1,IGFBP2,MREG,ATP8B1,SLC7A5,ABCB1A,ABCB4,CYP4A32,FAT1,HSPA1A
ribosome	0.0019	257	993	31	12.1	CC	RPS11,RPS9,RPS18,RPS5,RPS14,RPS24,RPS20,RPL22,PRMT3,RBM3,RPS29,RPS16,RPL10A,FAU,RPL12,RPL22L1,MRPS27,RPL9,RPS8,RPS23,RPS27RT,NPM1,RPL32,RPS7,RPS12,RPL35,RPS28,RPL13A,RPL39,RPS27,RPL41
transport	6.63e-07	4258	993	272	6.4	BP	TOM1L2,VPREB3,SNAPIN,S100A6,LGALS9,PCNT,KPNB1,ERGIC1,IL16,SMO,SLC25A1,CALR,PHB2,AQP1,LETM1,PRKACA,ATP4A,TOMM40L,PRG4,SUSD2,SLC5A6,CAV1,RARRES2,DMAP1,SLC3A2,FUZ,SLC41A1,CLIC3,SLC25A13,ABCA1,STEAP2,MAPKAPK2,NUP50,VPS53,SGK2,SRSF1,ATP5G3,SLC22A5,SLC25A22,ATP6V0A1,UBXN6,LRP11,SGK1,ARG1,CRY1,SLC16A7,MICU1,AVPR1A,SLC1A4,SLC36A1,HSPA4,IGFBP3,SREBF1,NBAS,NCOA1,PECAM1,NR1D1,STAT5B,SLC25A29,SLC17A1,SSR1,SL…
transferase activity	0.0106	2398	993	154	6.4	MF	KAT2B,STK38L,HLTF,INMT,MMD,PRKACA,CS,GCAT,ELOVL1,ST3GAL1,LONRF3,MAPKAPK2,SGK2,PDK4,SGK1,MKNK2,NAMPT,RNF144A,NCOA1,GALK1,ACLY,FDFT1,TRAF3,NSD1,TERT,PLAU,NADK2,TYMP,ST3GAL6,PARP3,ACAT2,PIM1,EIF2AK2,QPCT,DNTT,TRIM8,GSTO1,FASN,PI4K2A,AATK,TALDO1,TK1,MAP4K4,AGXT,NEK6,PKN3,UBE2L6,GATM,ITPKA,UBOX5,CRLS1,GSTM4,PMVK,NTRK1,CTH,TSTD3,EPHA7,NANS,ST3GAL3,EXTL1,CLOCK,SULT1B1,SULT1D1,DCK,PRKAB1,MMAB,ZC3HAV1,NAT…
hydrolase activity	0.0146	2545	993	161	6.3	MF	SCPEP1,CAPNS1,PSMC3,HLTF,NUDT14,MCM2,LIPE,MYO9B,POR,ATP4A,PPP2R1A,ABCA1,CLPX,EXOSC10,DHX58,ATP5G3,ATP6V0A1,ARG1,VNN3,ARSG,PSMC5,GPLD1,WRNIP1,ACOT12,PLAU,RNASEH2B,TAB1,MYH9,ARSA,EIF4A2,SYNJ2,IMPA2,LIPA,ACY3,CAPN1,FASN,CPN1,ABHD6,PTPRJ,SIRT3,ATP5C1,ADAM23,RHBDD1,XRCC5,TUBA4A,DESI2,PTER,TOR1B,TOR1A,KYNU,PSMD14,ABCA2,DYNC1I2,ABCB11,LPIN3,GINS1,ZBP1,ATP9A,CAR1,CAR3,AHCY,ADAR,ATP6V0D2,VCP,USP24,PDE4B,C…
cellular biosynthetic process	5.93e-09	5585	993	349	6.2	BP	KAT2B,SP1,SRR,DDT,IL16,SMO,NACC1,PSMC3,DAXX,HLTF,IKZF4,MCM2,LIPE,RPS11,CYP17A1,CALR,PHB2,AQP1,POR,NR1I3,RPS9,ELOVL1,MVD,CAV1,MID1IP1,CARHSP1,RPS18,BMP7,DMAP1,KDSR,WNT2,PLIN5,MED15,RPA3,RPS5,ST3GAL1,SLC25A13,ABCA1,MAPKAPK2,EXOSC10,MAFK,ATP5G3,PELP1,E2F2,ATP6V0A1,PDK4,ARG1,CRY1,AVPR1A,MKNK2,NFYB,TNIP1,BTG2,SREBF1,NAMPT,NCOA1,PSMC5,MIF4GD,GALK1,TEN1,NR1D1,ACLY,STAT5B,FOS,FDFT1,TRAF3,ID4,WRNIP1,NSD1,…
endoplasmic reticulum membrane	0.0154	877	993	69	7.9	CC	CYP51,ERGIC1,CALR,POR,ELOVL1,CAV1,CLSTN3,KDSR,HSD11B1,SGK1,SREBF1,FDFT1,SSR1,HMGCR,SQLE,SREBF2,PIGX,CYP39A1,FADS3,RHBDD1,TOR1A,HSD17B12,PEX16,SLC27A2,CYP2U1,VCP,CYP4B1,EXTL1,FAM69A,NAT8,TMCC1,SLC27A5,NOX4,CDIPT,ACER3,ANKS4B,NSDHL,MSMO1,SC5D,PARP16,LSS,RPS29,REEP6,TMTC2,SIGMAR1,PNPLA7,TAP1,TAPBPL,FMO2,FMO1,CYP2C37,ZC3H12A,SLC35G1,INSIG1,IRGM1,AGMO,TOR1AIP2,CYP2C50,CYP3A11,RETSAT,DHCR7,CYP4A12A,RDH…
protein dimerization activity	0.0278	1400	993	98	7	MF	S100A6,SP1,SRR,DAXX,IKZF4,MVD,PPP2R1A,CAV1,BIK,E2F2,MICU1,NFYB,SREBF1,NAMPT,NCOA1,PECAM1,STAT5B,FOS,ID4,TERT,HMGCR,ACOX2,BNIP3L,NADK2,PPARA,MYH9,SREBF2,TYMP,FOXP4,CBS,SPATA24,IMPA2,RELA,RBP4,TRIM8,FASN,HPS1,PDGFA,MFF,AGXT,SCLY,EPRS,ATF3,NR4A2,KYNU,BMP2,SCHIP1,GSTM4,S100A11,PDGFC,ZBTB7B,NTRK1,GCLM,MYCL,GALE,CLOCK,DCK,RILPL1,TFEC,ASNS,ABCG2,TMCC1,BHLHE41,ATG7,QPRT,LHPP,FGFR1,ACPP,PPP1R9A,CEBPA,GADD…
identical protein binding	4.05e-05	1814	993	133	7.3	MF	S100A6,SP1,SRR,GRAMD3,PSMC3,ANGPTL4,IKZF4,NUDT14,RABAC1,AQP1,MVD,CAV1,MID1IP1,PLIN5,MLKL,SLC25A13,GATSL2,CEP57L1,MICU1,TNIP1,NAMPT,PECAM1,WRNIP1,GKAP1,TERT,XRCC4,HMGCR,ACOX2,HACL1,BNIP3L,NADK2,MTSS1,MYH9,CLDN1,TYMP,APP,RCAN1,FOXP4,CBS,EIF2AK2,SPATA24,IMPA2,ACY3,RELA,TRIM8,FASN,PTPRJ,BAIAP2,NAB2,TK1,PARD3,PDGFA,SLC40A1,MFF,AGXT,SCLY,APCS,EPRS,ATF3,KYNU,NMI,SORD,BMP2,ZBP1,AHCY,SCHIP1,GSTM4,S100A11,…
transporter activity	1.61e-05	1174	993	97	8.3	MF	S100A6,KPNB1,SLC25A1,AQP1,LETM1,ATP4A,TOMM40L,SLC5A6,SLC3A2,SLC41A1,CLIC3,SLC25A13,ABCA1,STEAP2,ATP5G3,SLC22A5,SLC25A22,ATP6V0A1,SLC16A7,SLC1A4,SLC36A1,SLC25A29,SLC17A1,SLC25A48,CHRNA2,GPIHBP1,SLC10A2,SERINC2,SLC23A1,STARD4,SLC25A45,RBP4,ATP5C1,SLC40A1,SLC45A3,MPC2,ABCA2,ABCB11,SLC27A2,SLC20A1,ATP9A,TMEM144,ASIC5,ATP6V0D2,ABCB1B,ABCB8,SLC25A33,SLC35F6,ABCG2,SLC13A4,SLCO1A4,SLC27A5,AQP8,ATP11A,RAS…
establishment of localization	9.29e-06	4388	993	273	6.2	BP	TOM1L2,VPREB3,SNAPIN,S100A6,LGALS9,PCNT,KPNB1,ERGIC1,IL16,SMO,SLC25A1,CALR,PHB2,AQP1,LETM1,PRKACA,ATP4A,TOMM40L,PRG4,SUSD2,SLC5A6,CAV1,RARRES2,DMAP1,SLC3A2,FUZ,SLC41A1,CLIC3,SLC25A13,ABCA1,STEAP2,MAPKAPK2,NUP50,VPS53,SGK2,SRSF1,ATP5G3,SLC22A5,SLC25A22,ATP6V0A1,UBXN6,LRP11,SGK1,ARG1,CRY1,SLC16A7,MICU1,AVPR1A,SLC1A4,SLC36A1,HSPA4,IGFBP3,SREBF1,NBAS,NCOA1,PECAM1,NR1D1,STAT5B,SLC25A29,SLC17A1,SSR1,SL…
endomembrane system	0.000524	3746	993	231	6.2	CC	VPREB3,SNAPIN,S100A6,KPNB1,CYP51,ERGIC1,SMO,RABAC1,CYP17A1,CALR,MMD,AQP1,NDRG1,PRKACA,POR,ELOVL1,CAV1,CLSTN3,OIT3,KDSR,TANGO2,ATRAID,ST3GAL1,DNAJB9,ABCA1,STEAP2,HSD11B1,NUP50,CMAH,BIK,VPS53,ATP6V0A1,UBXN6,CYB561,SGK1,SLC36A1,IGFBP3,SREBF1,NBAS,ARSG,RNF144A,PXDN,FOS,FDFT1,TRAF3,SSR1,GKAP1,HMGCR,AP3M1,BNIP3L,SQLE,RANGAP1,SREBF2,ARSA,ST3GAL6,APP,PIGX,CYP39A1,TFF3,FADS3,GSTO1,FASN,PI4K2A,CPN1,NDUFB8,…
positive regulation of macromolecule metabolic process	0.00526	3075	993	191	6.2	BP	KAT2B,LGALS9,SP1,DDT,SMO,PSMC3,DAXX,HLTF,IKZF4,CALR,MMD,PHB2,NR1I3,RPS9,CAV1,GPRC5B,BMP7,RARRES2,WNT2,FUZ,CLPX,LONRF3,MAPKAPK2,SRSF1,PELP1,E2F2,NFYB,TNIP1,BTG2,IGFBP3,SREBF1,NAMPT,NBAS,RNF144A,NCOA1,PSMC5,PECAM1,NR1D1,STAT5B,FOS,GPLD1,ID4,NSD1,TERT,HMGCR,TSC22D1,PPARA,L3MBTL2,TAB1,MYH9,SREBF2,NR1I2,APP,PARP3,EIF2AK2,NELFE,LTB,RELA,NAB2,PAIP1,SIRT3,RPTOR,CPEB1,JADE1,PARD3,PDGFA,SLC40A1,RHBDD1,XRCC…
organonitrogen compound metabolic process	8.39e-10	6474	993	397	6.1	BP	SCPEP1,KAT2B,SNAPIN,LGALS9,SRR,STK38L,DDT,CAPNS1,PSMC3,DAXX,HLTF,FKBP11,RPS11,INMT,CALR,MMD,PHB2,AQP1,PRKACA,POR,CS,RPS9,GCAT,ELOVL1,MVD,PPP2R1A,CAV1,RPS18,GPRC5B,BMP7,RARRES2,DMAP1,KDSR,FUZ,RPS5,ATRAID,ST3GAL1,DNAJB9,SLC25A13,ABCA1,CLPX,HSD11B1,LONRF3,MAPKAPK2,TTLL12,SGK2,ATP5G3,SLC22A5,ATP6V0A1,PDK4,UBXN6,SGK1,ARG1,VNN3,CRY1,MKNK2,CABIN1,TNIP1,BTG2,IGFBP3,SREBF1,NAMPT,RNF144A,NCOA1,PSMC5,PECAM1…
organic anion transmembrane transporter activity	0.00694	207	993	26	12.6	MF	SLC25A1,SLC3A2,SLC25A13,SLC22A5,SLC25A22,SLC16A7,SLC1A4,SLC36A1,SLC25A29,SLC10A2,SERINC2,SLC23A1,MPC2,ABCB11,SLC27A2,SLCO1A4,SLC27A5,SLC25A15,SLC7A2,SLCO2A1,SLC22A15,SLC38A7,ATP8B1,SLC7A5,SLC22A26,GM6614
intracellular organelle part	5.85e-11	7938	993	473	6	CC	NARF,KAT2B,SNAPIN,S100A6,PCNT,SP1,KPNB1,CYP51,ERGIC1,GRAMD3,IL16,SMO,NACC1,PSMC3,DAXX,HLTF,IKZF4,MCM2,RPS11,SLC25A1,CALR,MMD,PHB2,AQP1,MYO9B,NDRG1,SPC25,LETM1,PRKACA,POR,TOMM40L,NR1I3,CS,TBCB,FBLIM1,RPS9,GCAT,ELOVL1,MVD,PPP2R1A,FANCE,CAV1,MID1IP1,CLSTN3,RPS18,GPRC5B,DMAP1,OIT3,KDSR,RDM1,MED15,RPA3,RPS5,ATRAID,ST3GAL1,DNAJB9,CLIC3,SLC25A13,CLPX,STEAP2,HSD11B1,MAPKAPK2,NUP50,BIK,EXOSC10,VPS53,SGK2,…
transition metal ion binding	5.64e-05	1039	993	87	8.4	MF	S100A6,CYP51,HLTF,IKZF4,CYP17A1,CALR,PRKACA,NR1I3,DHX58,RTN4IP1,ARG1,NR1D1,TRAF3,NSD1,PPARA,L3MBTL2,NR1I2,HRG,APP,CYP39A1,PIM1,QPCT,TRIM8,CUTC,CPN1,SIRT3,TK1,EPRS,PTER,NR4A2,TRIM44,SORD,CAR1,CAR3,AHCY,CYP2U1,RORC,CYP4A31,CYP4B1,ALB,CNBP,CYP2B10,ZFAND6,CDIPT,CAR5B,MSMO1,NUDT7,SC5D,RECQL4,RPS29,GALT,POLR2L,CAR14,POLR3K,AGBL3,DDX58,TRIM7,CAR8,CYP2C37,S100A13,LACC1,FBXO40,TIMM8A1,AGMO,PRKCA,COA6,TCHH…
structural constituent of ribosome	0.000133	181	993	27	14.9	MF	RPS11,RPS9,RPS18,RPS5,RPS14,RPS24,RPS20,RPL22,RPS29,RPS16,RPL10A,FAU,RPL12,RPL22L1,RPL9,RPS8,RPS23,RPS27RT,RPL32,RPS7,RPS12,RPL35,RPS28,RPL13A,RPL39,RPS27,RPL41
transcription factor binding	0.0421	637	993	53	8.3	MF	KAT2B,SP1,PSMC3,DAXX,IKZF4,CALR,DMAP1,MAFK,PELP1,E2F2,CRY1,NFYB,NCOA1,PSMC5,NR1D1,STAT5B,FOS,ID4,NSD1,TERT,PPARA,PIM1,RELA,BAIAP2,NAB2,RPTOR,NEK6,NR4A2,LRP2,MED19,RORC,CLOCK,ACTB,BHLHE41,ATG7,PSMC4,BBS2,WWP2,SMARCA4,TRIB1,CEBPA,CITED2,PIK3R1,JUNB,BCL3,ARNTL,NPM1,TRP53,IFI27,HES6,JUND,HSPA1A,NUP62
binding	0.00392	13657	993	687	5	MF	NARF,TOM1L2,KAT2B,SNAPIN,S100A6,LGALS9,PCNT,SP1,SRR,KPNB1,CYP51,STK38L,DDT,GRAMD3,IL16,SMO,CAPNS1,NACC1,PSMC3,ANGPTL4,DAXX,HLTF,IKZF4,NUDT14,MCM2,LIPE,FKBP11,RABAC1,RPS11,CYP17A1,CALR,PHB2,AQP1,MYO9B,NDRG1,LETM1,PRKACA,POR,ATP4A,TOMM40L,NR1I3,PRG4,TBCB,FBLIM1,RPS9,SUSD2,GCAT,MVD,PPP2R1A,CAV1,MID1IP1,CLSTN3,CARHSP1,RPS18,GPRC5B,BMP7,RARRES2,DMAP1,OIT3,SLC3A2,RDM1,WNT2,PLIN5,RPA3,MLKL,RPS5,DNAJB9,S…
cellular nitrogen compound metabolic process	9.49e-07	6149	993	366	6	BP	KAT2B,SP1,IL16,SMO,NACC1,PSMC3,DAXX,HLTF,IKZF4,MCM2,LIPE,RPS11,CALR,PHB2,AQP1,PRKACA,POR,NR1I3,CS,RPS9,ELOVL1,MVD,CAV1,CARHSP1,RPS18,BMP7,DMAP1,RDM1,WNT2,MED15,RPA3,RPS5,SLC25A13,CLPX,HSD11B1,MAPKAPK2,CMAH,EXOSC10,MAFK,SRSF1,ATP5G3,SLC22A5,PELP1,E2F2,ATP6V0A1,PDK4,ARG1,VNN3,CRY1,MKNK2,NFYB,TNIP1,BTG2,IGFBP3,SREBF1,NAMPT,NBAS,NCOA1,PSMC5,MIF4GD,GALK1,TEN1,NR1D1,ACLY,STAT5B,DCAF4,FOS,TRAF3,SLC17A1,…
organic cyclic compound metabolic process	1.21e-06	5794	993	348	6	BP	KAT2B,SP1,CYP51,DDT,IL16,SMO,NACC1,PSMC3,DAXX,HLTF,IKZF4,MCM2,LIPE,CYP17A1,CALR,PHB2,AQP1,PRKACA,POR,NR1I3,CS,ELOVL1,MVD,CAV1,CARHSP1,BMP7,DMAP1,RDM1,WNT2,MED15,RPA3,SLC25A13,ABCA1,CLPX,HSD11B1,MAPKAPK2,CMAH,EXOSC10,MAFK,SRSF1,ATP5G3,PELP1,E2F2,ATP6V0A1,PDK4,CRY1,NFYB,TNIP1,BTG2,IGFBP3,SREBF1,NAMPT,NBAS,NCOA1,PSMC5,GALK1,TEN1,NR1D1,ACLY,STAT5B,DCAF4,FOS,FDFT1,TRAF3,SLC17A1,ID4,WRNIP1,NSD1,TERT,XR…
membrane-bounded organelle	2.36e-17	10644	993	624	5.9	CC	NARF,HDDC2,KAT2B,VPREB3,SNAPIN,S100A6,LGALS9,SP1,KPNB1,CYP51,ERGIC1,IL16,SMO,NACC1,PSMC3,DAXX,HLTF,IKZF4,MCM2,LIPE,RABAC1,SLC25A1,CYP17A1,CALR,MMD,PHB2,AQP1,NDRG1,SPC25,LETM1,PRKACA,POR,TOMM40L,NR1I3,CS,FBLIM1,RPS9,GCAT,ELOVL1,MVD,SLC5A6,FANCE,CAV1,MID1IP1,CLSTN3,RPS18,GPRC5B,BMP7,DMAP1,OIT3,KDSR,SLC3A2,IFI35,RDM1,PLIN5,MED15,RPA3,TANGO2,ATRAID,ST3GAL1,DNAJB9,CLIC3,SLC25A13,ABCA1,CLPX,STEAP2,HSD1…
cellular metabolic process	6.95e-17	10036	993	595	5.9	BP	SCPEP1,KAT2B,SNAPIN,LGALS9,SP1,SRR,STK38L,DDT,IL16,SMO,NACC1,PSMC3,DAXX,HLTF,IKZF4,MCM2,LIPE,FKBP11,RPS11,CYP17A1,CALR,MMD,PHB2,AQP1,PRKACA,POR,NR1I3,CS,RPS9,GCAT,ELOVL1,MVD,PPP2R1A,CAV1,MID1IP1,CARHSP1,RPS18,GPRC5B,BMP7,RARRES2,DMAP1,KDSR,RDM1,WNT2,PLIN5,FUZ,MED15,RPA3,RPS5,ATRAID,ST3GAL1,DNAJB9,SLC25A13,ABCA1,CLPX,HSD11B1,LONRF3,MAPKAPK2,CMAH,TTLL12,EXOSC10,SGK2,MAFK,SRSF1,ATP5G3,SLC22A5,PELP1,…
system development	0.00275	4523	993	266	5.9	BP	KAT2B,SNAPIN,LGALS9,SP1,SRR,SMO,ANGPTL4,MCM2,CALR,MMD,PHB2,AQP1,NDRG1,PRKACA,POR,TBCB,CAV1,CLSTN3,GPRC5B,BMP7,RARRES2,WNT2,FUZ,ATRAID,DNAJB9,HSD11B1,MAPKAPK2,NUP50,BIK,MAFK,SRSF1,SLC22A5,E2F2,RSPO3,SGK1,ARG1,AVPR1A,MKNK2,BTG2,SREBF1,NCOA1,PECAM1,STAT5B,FOS,GPLD1,ID4,TERT,HMGCR,DHFR,PLAU,PPARA,TAB1,MYH9,CLDN1,IL1RAP,TYMP,ARSA,HRG,APP,RCAN1,FOXP4,PIM1,CBS,EIF2AK2,SLC23A1,LTB,PCDH12,RPS14,LIPA,OVOL1…
intracellular	4.7e-30	13871	993	798	5.8	CC	NARF,SCPEP1,HDDC2,TOM1L2,KAT2B,VPREB3,SNAPIN,S100A6,LGALS9,PCNT,SP1,SRR,KPNB1,CYP51,ERGIC1,STK38L,DDT,GRAMD3,IL16,SMO,CAPNS1,NACC1,PSMC3,DAXX,HLTF,IKZF4,NUDT14,MCM2,LIPE,FKBP11,RABAC1,RPS11,INMT,SLC25A1,CYP17A1,CALR,MMD,PHB2,AQP1,MYO9B,NDRG1,SPC25,LETM1,PRKACA,POR,TOMM40L,NR1I3,CS,TBCB,FBLIM1,RPS9,GCAT,ELOVL1,MVD,PPP2R1A,FANCE,CAV1,MID1IP1,CLSTN3,CARHSP1,RPS18,GPRC5B,DMAP1,OIT3,KDSR,SLC3A2,IFI35,…
nucleotide binding	1.53e-05	2194	993	156	7.1	MF	SRR,STK38L,PSMC3,HLTF,MCM2,MYO9B,PRKACA,POR,ATP4A,MVD,MLKL,ABCA1,CLPX,HSD11B1,MAPKAPK2,TTLL12,EXOSC10,DHX58,SGK2,SLC22A5,PDK4,SGK1,CRY1,MKNK2,HSPA4,PSMC5,GALK1,ACLY,WRNIP1,ECI2,ACOT12,HMGCR,DHFR,ACOX2,NADK2,SQLE,MYH9,EIF4A2,PIM1,EIF2AK2,FASN,PI4K2A,AATK,SIRT3,TK1,ARL10,ACADL,MAP4K4,XRCC5,TUBA4A,FARSB,EPRS,NEK6,PKN3,TOR1B,TOR1A,ABCA2,ABCB11,UBE2L6,SORD,ITPKA,SLC27A2,ATP9A,AHCY,PMVK,NTRK1,EPHA7,VCP…
purine nucleotide binding	0.00156	1951	993	134	6.9	MF	SRR,STK38L,PSMC3,HLTF,MCM2,MYO9B,PRKACA,ATP4A,MVD,MLKL,ABCA1,CLPX,MAPKAPK2,TTLL12,DHX58,SGK2,SLC22A5,PDK4,SGK1,MKNK2,HSPA4,PSMC5,GALK1,ACLY,WRNIP1,ECI2,ACOT12,NADK2,MYH9,EIF4A2,PIM1,EIF2AK2,PI4K2A,AATK,TK1,ARL10,ACADL,MAP4K4,XRCC5,TUBA4A,FARSB,EPRS,NEK6,PKN3,TOR1B,TOR1A,ABCA2,ABCB11,UBE2L6,ITPKA,SLC27A2,ATP9A,AHCY,PMVK,NTRK1,EPHA7,VCP,PDE4B,PSMC2,ABCB1B,ABCB8,DCK,MMAB,ACTB,RASL11A,ASNS,ABCG2,SLC2…
adenyl nucleotide binding	0.000407	1584	993	116	7.3	MF	SRR,STK38L,PSMC3,HLTF,MCM2,MYO9B,PRKACA,ATP4A,MVD,MLKL,ABCA1,CLPX,MAPKAPK2,TTLL12,DHX58,SGK2,SLC22A5,PDK4,SGK1,MKNK2,HSPA4,PSMC5,GALK1,ACLY,WRNIP1,ECI2,ACOT12,NADK2,MYH9,EIF4A2,PIM1,EIF2AK2,PI4K2A,AATK,TK1,ACADL,MAP4K4,XRCC5,FARSB,EPRS,NEK6,PKN3,TOR1B,TOR1A,ABCA2,ABCB11,UBE2L6,ITPKA,SLC27A2,ATP9A,AHCY,PMVK,NTRK1,EPHA7,VCP,PDE4B,PSMC2,ABCB1B,ABCB8,DCK,MMAB,ACTB,ASNS,ABCG2,SLC27A5,PSMC4,MYH14,DNHD1…
intracellular organelle lumen	0.0438	4135	993	239	5.8	CC	NARF,KAT2B,SP1,KPNB1,ERGIC1,IL16,NACC1,PSMC3,DAXX,HLTF,IKZF4,MCM2,CALR,PHB2,PRKACA,NR1I3,CS,FBLIM1,RPS9,GCAT,MVD,FANCE,GPRC5B,DMAP1,RDM1,MED15,RPA3,DNAJB9,CLIC3,CLPX,MAPKAPK2,NUP50,EXOSC10,SGK2,MAFK,SRSF1,PELP1,ATP6V0A1,PDK4,SGK1,CRY1,MICU1,MKNK2,CABIN1,NFYB,TNIP1,IGFBP3,SREBF1,NAMPT,NCOA1,PSMC5,MIF4GD,TEN1,NR1D1,ACLY,STAT5B,FOS,WRNIP1,ECI2,TERT,XRCC4,RNASEH2B,BNIP3L,MBNL2,DCAF11,PPARA,RANGAP1,TA…
heme binding	0.00388	176	993	24	13.6	MF	CYP51,CYP17A1,PXDN,NR1D1,CYC1,HRG,CYP39A1,CBS,CYP2U1,CYP4A31,CYP4B1,CYP2B10,CYB5B,CYP2C37,CYP2C50,CYP3A11,CYP2D22,CYP4A32,CYP4A12A,CYP2C54,CYP2D40,CYP2C68,CYP4A12B,CYP2D10
organelle lumen	0.0477	4140	993	239	5.8	CC	NARF,KAT2B,SP1,KPNB1,ERGIC1,IL16,NACC1,PSMC3,DAXX,HLTF,IKZF4,MCM2,CALR,PHB2,PRKACA,NR1I3,CS,FBLIM1,RPS9,GCAT,MVD,FANCE,GPRC5B,DMAP1,RDM1,MED15,RPA3,DNAJB9,CLIC3,CLPX,MAPKAPK2,NUP50,EXOSC10,SGK2,MAFK,SRSF1,PELP1,ATP6V0A1,PDK4,SGK1,CRY1,MICU1,MKNK2,CABIN1,NFYB,TNIP1,IGFBP3,SREBF1,NAMPT,NCOA1,PSMC5,MIF4GD,TEN1,NR1D1,ACLY,STAT5B,FOS,WRNIP1,ECI2,TERT,XRCC4,RNASEH2B,BNIP3L,MBNL2,DCAF11,PPARA,RANGAP1,TA…
organic substance metabolic process	8.19e-13	10623	993	605	5.7	BP	SCPEP1,KAT2B,SNAPIN,LGALS9,SP1,SRR,CYP51,STK38L,DDT,IL16,SMO,CAPNS1,NACC1,PSMC3,ANGPTL4,DAXX,HLTF,IKZF4,MCM2,LIPE,FKBP11,RPS11,INMT,CYP17A1,CALR,MMD,PHB2,AQP1,PRKACA,POR,NR1I3,CS,RPS9,GCAT,ELOVL1,MVD,PPP2R1A,CAV1,MID1IP1,CARHSP1,RPS18,GPRC5B,BMP7,RARRES2,DMAP1,KDSR,SLC3A2,RDM1,WNT2,PLIN5,FUZ,MED15,RPA3,RPS5,ATRAID,ST3GAL1,DNAJB9,SLC25A13,ABCA1,CLPX,HSD11B1,LONRF3,MAPKAPK2,CMAH,TTLL12,EXOSC10,SGK2…
primary metabolic process	4.88e-12	10186	993	582	5.7	BP	SCPEP1,KAT2B,SNAPIN,LGALS9,SP1,SRR,CYP51,STK38L,DDT,IL16,SMO,CAPNS1,NACC1,PSMC3,ANGPTL4,DAXX,HLTF,IKZF4,MCM2,LIPE,FKBP11,RPS11,CYP17A1,CALR,MMD,PHB2,AQP1,PRKACA,POR,NR1I3,CS,RPS9,GCAT,ELOVL1,MVD,PPP2R1A,CAV1,MID1IP1,CARHSP1,RPS18,GPRC5B,BMP7,RARRES2,DMAP1,KDSR,SLC3A2,RDM1,WNT2,PLIN5,FUZ,MED15,RPA3,RPS5,ATRAID,ST3GAL1,DNAJB9,SLC25A13,ABCA1,CLPX,HSD11B1,LONRF3,MAPKAPK2,CMAH,TTLL12,EXOSC10,SGK2,MAFK…
purine ribonucleoside triphosphate binding	0.0019	1867	993	129	6.9	MF	SRR,STK38L,PSMC3,HLTF,MCM2,MYO9B,PRKACA,ATP4A,MVD,MLKL,ABCA1,CLPX,MAPKAPK2,TTLL12,DHX58,SGK2,SLC22A5,PDK4,SGK1,MKNK2,HSPA4,PSMC5,GALK1,ACLY,WRNIP1,ACOT12,NADK2,MYH9,EIF4A2,PIM1,EIF2AK2,PI4K2A,AATK,TK1,ARL10,MAP4K4,XRCC5,TUBA4A,FARSB,EPRS,NEK6,PKN3,TOR1B,TOR1A,ABCA2,ABCB11,UBE2L6,ITPKA,SLC27A2,ATP9A,PMVK,NTRK1,EPHA7,VCP,PSMC2,ABCB1B,ABCB8,DCK,MMAB,ACTB,RASL11A,ASNS,ABCG2,SLC27A5,PSMC4,RAB30,MYH14,…
ion binding	0.000962	6034	993	343	5.7	MF	S100A6,SP1,SRR,CYP51,STK38L,CAPNS1,PSMC3,HLTF,IKZF4,NUDT14,MCM2,CYP17A1,CALR,MYO9B,LETM1,PRKACA,POR,ATP4A,NR1I3,FBLIM1,GCAT,MVD,CLSTN3,BMP7,OIT3,MLKL,SLC25A13,ABCA1,CLPX,STEAP2,LONRF3,MAPKAPK2,CMAH,TTLL12,DHX58,SGK2,SLC22A5,PDK4,CYB561,RTN4IP1,RSPO3,SGK1,ARG1,MICU1,MKNK2,HSPA4,ARSG,RNF144A,PXDN,PSMC5,GALK1,NR1D1,ACLY,TRAF3,WRNIP1,ECI2,NSD1,TERT,ACOT12,HMGCR,DHFR,ACOX2,HACL1,CHRNA2,MBNL2,NADK2,SQL…
heterocyclic compound binding	0.0017	5737	993	327	5.7	MF	KAT2B,SP1,SRR,CYP51,STK38L,PSMC3,HLTF,IKZF4,MCM2,LIPE,FKBP11,RPS11,CYP17A1,CALR,MYO9B,PRKACA,POR,ATP4A,NR1I3,RPS9,GCAT,MVD,CARHSP1,RPS18,SLC3A2,RDM1,RPA3,MLKL,RPS5,ABCA1,CLPX,HSD11B1,MAPKAPK2,TTLL12,EXOSC10,DHX58,SGK2,MAFK,SRSF1,SLC22A5,E2F2,PDK4,SGK1,CRY1,MKNK2,NFYB,HSPA4,SREBF1,NCOA1,PXDN,PSMC5,MIF4GD,GALK1,TEN1,NR1D1,ACLY,STAT5B,DCAF4,FOS,WRNIP1,ECI2,NSD1,TERT,XRCC4,ACOT12,HMGCR,DHFR,ACOX2,HAC…
purine ribonucleotide binding	0.00191	1940	993	133	6.9	MF	SRR,STK38L,PSMC3,HLTF,MCM2,MYO9B,PRKACA,ATP4A,MVD,MLKL,ABCA1,CLPX,MAPKAPK2,TTLL12,DHX58,SGK2,SLC22A5,PDK4,SGK1,MKNK2,HSPA4,PSMC5,GALK1,ACLY,WRNIP1,ECI2,ACOT12,NADK2,MYH9,EIF4A2,PIM1,EIF2AK2,PI4K2A,AATK,TK1,ARL10,ACADL,MAP4K4,XRCC5,TUBA4A,FARSB,EPRS,NEK6,PKN3,TOR1B,TOR1A,ABCA2,ABCB11,UBE2L6,ITPKA,SLC27A2,ATP9A,PMVK,NTRK1,EPHA7,VCP,PDE4B,PSMC2,ABCB1B,ABCB8,DCK,MMAB,ACTB,RASL11A,ASNS,ABCG2,SLC27A5,P…
adenyl ribonucleotide binding	0.000522	1574	993	115	7.3	MF	SRR,STK38L,PSMC3,HLTF,MCM2,MYO9B,PRKACA,ATP4A,MVD,MLKL,ABCA1,CLPX,MAPKAPK2,TTLL12,DHX58,SGK2,SLC22A5,PDK4,SGK1,MKNK2,HSPA4,PSMC5,GALK1,ACLY,WRNIP1,ECI2,ACOT12,NADK2,MYH9,EIF4A2,PIM1,EIF2AK2,PI4K2A,AATK,TK1,ACADL,MAP4K4,XRCC5,FARSB,EPRS,NEK6,PKN3,TOR1B,TOR1A,ABCA2,ABCB11,UBE2L6,ITPKA,SLC27A2,ATP9A,PMVK,NTRK1,EPHA7,VCP,PDE4B,PSMC2,ABCB1B,ABCB8,DCK,MMAB,ACTB,ASNS,ABCG2,SLC27A5,PSMC4,MYH14,DNHD1,ATP1…
ATP binding	0.000665	1511	993	111	7.3	MF	SRR,STK38L,PSMC3,HLTF,MCM2,MYO9B,PRKACA,ATP4A,MVD,MLKL,ABCA1,CLPX,MAPKAPK2,TTLL12,DHX58,SGK2,SLC22A5,PDK4,SGK1,MKNK2,HSPA4,PSMC5,GALK1,ACLY,WRNIP1,ACOT12,NADK2,MYH9,EIF4A2,PIM1,EIF2AK2,PI4K2A,AATK,TK1,MAP4K4,XRCC5,FARSB,EPRS,NEK6,PKN3,TOR1B,TOR1A,ABCA2,ABCB11,UBE2L6,ITPKA,SLC27A2,ATP9A,PMVK,NTRK1,EPHA7,VCP,PSMC2,ABCB1B,ABCB8,DCK,MMAB,ACTB,ASNS,ABCG2,SLC27A5,PSMC4,MYH14,DNHD1,ATP11A,FGFR1,JAK3,AAR…
catalytic activity	7.9e-22	5935	993	416	7	MF	NARF,SCPEP1,KAT2B,SRR,CYP51,STK38L,DDT,CAPNS1,PSMC3,HLTF,NUDT14,MCM2,LIPE,FKBP11,INMT,CYP17A1,MMD,MYO9B,PRKACA,POR,ATP4A,CS,GCAT,ELOVL1,MVD,PPP2R1A,KDSR,SLC3A2,GFOD2,ST3GAL1,ABCA1,CLPX,STEAP2,HSD11B1,LONRF3,MAPKAPK2,CMAH,EXOSC10,DHX58,SGK2,ATP5G3,ATP6V0A1,PDK4,CYB561,RTN4IP1,SGK1,ARG1,VNN3,MKNK2,NAMPT,ARSG,RNF144A,NCOA1,PXDN,PSMC5,GALK1,DHRS13,ACLY,DHRS7,FDFT1,TRAF3,GPLD1,WRNIP1,ECI2,NSD1,TERT,AC…
anatomical structure development	0.0034	5469	993	312	5.7	BP	KAT2B,SNAPIN,LGALS9,SP1,SRR,SMO,PSMC3,ANGPTL4,MCM2,CALR,MMD,PHB2,AQP1,NDRG1,PRKACA,POR,TBCB,FBLIM1,PPP2R1A,CAV1,CLSTN3,GPRC5B,BMP7,RARRES2,WNT2,FUZ,ATRAID,DNAJB9,HSD11B1,MAPKAPK2,NUP50,BIK,MAFK,SRSF1,SLC22A5,E2F2,RSPO3,SGK1,ARG1,AVPR1A,MKNK2,1810043G02RIK,BTG2,IGFBP3,SREBF1,NCOA1,PECAM1,STAT5B,FOS,GPLD1,ID4,TERT,HMGCR,DHFR,PLAU,RNASEH2B,PPARA,L3MBTL2,TAB1,MYH9,CLDN1,IL1RAP,TYMP,ARSA,HRG,APP,RCAN1…
cellular aromatic compound metabolic process	0.00433	5627	993	319	5.7	BP	KAT2B,SP1,DDT,IL16,SMO,NACC1,PSMC3,DAXX,HLTF,IKZF4,MCM2,LIPE,CALR,PHB2,AQP1,PRKACA,NR1I3,CS,ELOVL1,MVD,CAV1,CARHSP1,BMP7,DMAP1,RDM1,WNT2,MED15,RPA3,SLC25A13,CLPX,HSD11B1,MAPKAPK2,CMAH,EXOSC10,MAFK,SRSF1,ATP5G3,PELP1,E2F2,ATP6V0A1,PDK4,CRY1,NFYB,TNIP1,BTG2,IGFBP3,SREBF1,NAMPT,NBAS,NCOA1,PSMC5,GALK1,TEN1,NR1D1,ACLY,STAT5B,DCAF4,FOS,TRAF3,SLC17A1,ID4,WRNIP1,NSD1,TERT,XRCC4,ACOT12,HMGCR,DHFR,RNASEH2B…
heterocycle metabolic process	0.00705	5574	993	315	5.7	BP	KAT2B,SP1,IL16,SMO,NACC1,PSMC3,DAXX,HLTF,IKZF4,MCM2,LIPE,CALR,PHB2,AQP1,PRKACA,NR1I3,CS,ELOVL1,MVD,CAV1,CARHSP1,BMP7,DMAP1,RDM1,WNT2,MED15,RPA3,SLC25A13,CLPX,HSD11B1,MAPKAPK2,CMAH,EXOSC10,MAFK,SRSF1,ATP5G3,PELP1,E2F2,ATP6V0A1,PDK4,CRY1,NFYB,TNIP1,BTG2,IGFBP3,SREBF1,NAMPT,NBAS,NCOA1,PSMC5,GALK1,TEN1,NR1D1,ACLY,STAT5B,DCAF4,FOS,TRAF3,SLC17A1,ID4,WRNIP1,NSD1,TERT,XRCC4,ACOT12,HMGCR,DHFR,RNASEH2B,TSC…
organic cyclic compound binding	0.00397	5828	993	329	5.6	MF	KAT2B,SP1,SRR,CYP51,STK38L,PSMC3,HLTF,IKZF4,MCM2,LIPE,FKBP11,RPS11,CYP17A1,CALR,MYO9B,PRKACA,POR,ATP4A,NR1I3,RPS9,GCAT,MVD,CARHSP1,RPS18,SLC3A2,RDM1,RPA3,MLKL,RPS5,ABCA1,CLPX,HSD11B1,MAPKAPK2,TTLL12,EXOSC10,DHX58,SGK2,MAFK,SRSF1,SLC22A5,E2F2,PDK4,SGK1,CRY1,MKNK2,NFYB,HSPA4,SREBF1,NCOA1,PXDN,PSMC5,MIF4GD,GALK1,TEN1,NR1D1,ACLY,STAT5B,DCAF4,FOS,WRNIP1,ECI2,NSD1,TERT,XRCC4,ACOT12,HMGCR,DHFR,ACOX2,HAC…
nitrogen compound metabolic process	3.73e-05	9669	993	523	5.4	BP	SCPEP1,KAT2B,SNAPIN,LGALS9,SP1,SRR,STK38L,DDT,IL16,SMO,CAPNS1,NACC1,PSMC3,DAXX,HLTF,IKZF4,MCM2,LIPE,FKBP11,RPS11,INMT,CALR,MMD,PHB2,AQP1,PRKACA,POR,NR1I3,CS,RPS9,GCAT,ELOVL1,MVD,PPP2R1A,CAV1,CARHSP1,RPS18,GPRC5B,BMP7,RARRES2,DMAP1,KDSR,RDM1,WNT2,FUZ,MED15,RPA3,RPS5,ATRAID,ST3GAL1,DNAJB9,SLC25A13,ABCA1,CLPX,HSD11B1,LONRF3,MAPKAPK2,CMAH,TTLL12,EXOSC10,SGK2,MAFK,SRSF1,ATP5G3,SLC22A5,PELP1,E2F2,ATP6V…
cell part	3.39e-11	17056	993	864	5.1	CC	NARF,SCPEP1,HDDC2,TOM1L2,KAT2B,VPREB3,SNAPIN,S100A6,LGALS9,PCNT,SP1,SRR,KPNB1,CYP51,ERGIC1,STK38L,DDT,GRAMD3,IL16,SMO,CAPNS1,NACC1,ESAM,PSMC3,DAXX,HLTF,IKZF4,NUDT14,MCM2,LIPE,FKBP11,RABAC1,RPS11,INMT,SLC25A1,CYP17A1,CALR,MMD,PHB2,AQP1,MYO9B,NDRG1,SPC25,LETM1,PRKACA,POR,TOMM40L,NR1I3,CS,TBCB,FBLIM1,RPS9,SUSD2,GCAT,ELOVL1,MVD,SLC5A6,PPP2R1A,FANCE,CAV1,MID1IP1,CLSTN3,CARHSP1,RPS18,GPRC5B,DMAP1,OIT3,…
hydrolase activity, acting on acid anhydrides, in phosphorus-containing anhydrides	0.00475	864	993	70	8.1	MF	PSMC3,HLTF,NUDT14,MCM2,MYO9B,ATP4A,ABCA1,CLPX,DHX58,ATP5G3,ATP6V0A1,PSMC5,WRNIP1,MYH9,EIF4A2,ATP5C1,XRCC5,TUBA4A,TOR1B,TOR1A,ABCA2,DYNC1I2,ABCB11,GINS1,ATP9A,ATP6V0D2,VCP,PSMC2,ABCB1B,ABCB8,RASL11A,GNGT1,ABCG2,PSMC4,RAB30,MYH14,DNHD1,LHPP,ATP11A,NUDT7,SMARCA4,GNG11,EEFSEC,DNM2,DDX19B,RECQL4,INO80,GNAT1,TUBB4B,TAP1,ATP11B,ATP5L,ATP8B1,RHOU,DDX58,ABCB1A,DDX24,ABCA8A,DCTPP1,ABCB4,TUBA1C,IRGM1,ARL4A,…
pyrophosphatase activity	0.00823	861	993	69	8	MF	PSMC3,HLTF,NUDT14,MCM2,MYO9B,ATP4A,ABCA1,CLPX,DHX58,ATP5G3,ATP6V0A1,PSMC5,WRNIP1,MYH9,EIF4A2,ATP5C1,XRCC5,TUBA4A,TOR1B,TOR1A,ABCA2,DYNC1I2,ABCB11,GINS1,ATP9A,ATP6V0D2,VCP,PSMC2,ABCB1B,ABCB8,RASL11A,GNGT1,ABCG2,PSMC4,RAB30,MYH14,DNHD1,LHPP,ATP11A,SMARCA4,GNG11,EEFSEC,DNM2,DDX19B,RECQL4,INO80,GNAT1,TUBB4B,TAP1,ATP11B,ATP5L,ATP8B1,RHOU,DDX58,ABCB1A,DDX24,ABCA8A,DCTPP1,ABCB4,TUBA1C,IRGM1,ARL4A,ATP5K,…
nucleoside-triphosphatase activity	0.0104	817	993	66	8.1	MF	PSMC3,HLTF,MCM2,MYO9B,ATP4A,ABCA1,CLPX,DHX58,ATP5G3,ATP6V0A1,PSMC5,WRNIP1,MYH9,EIF4A2,ATP5C1,XRCC5,TUBA4A,TOR1B,TOR1A,ABCA2,DYNC1I2,ABCB11,GINS1,ATP9A,ATP6V0D2,VCP,PSMC2,ABCB1B,ABCB8,RASL11A,GNGT1,ABCG2,PSMC4,RAB30,MYH14,DNHD1,ATP11A,SMARCA4,GNG11,EEFSEC,DNM2,DDX19B,RECQL4,INO80,GNAT1,TUBB4B,TAP1,ATP11B,ATP5L,ATP8B1,RHOU,DDX58,ABCB1A,DDX24,ABCA8A,ABCB4,TUBA1C,IRGM1,ARL4A,ATP5K,IDE,GNAI1,ATP8B4,RA…
ATPase activity	3.5e-05	422	993	47	11.1	MF	PSMC3,HLTF,MYO9B,ATP4A,ABCA1,CLPX,ATP5G3,ATP6V0A1,PSMC5,WRNIP1,MYH9,EIF4A2,ATP5C1,XRCC5,TOR1B,TOR1A,ABCA2,DYNC1I2,ABCB11,ATP9A,ATP6V0D2,VCP,PSMC2,ABCB1B,ABCB8,ABCG2,PSMC4,MYH14,DNHD1,ATP11A,SMARCA4,DDX19B,RECQL4,INO80,TAP1,ATP11B,ATP5L,ATP8B1,ABCB1A,DDX24,ABCA8A,ABCB4,ATP5K,IDE,ATP8B4,RNF213,HSPA1A
ATPase activity, coupled	0.00114	345	993	38	11	MF	PSMC3,ATP4A,ABCA1,CLPX,ATP5G3,ATP6V0A1,PSMC5,MYH9,EIF4A2,ATP5C1,XRCC5,ABCA2,DYNC1I2,ABCB11,ATP9A,ATP6V0D2,PSMC2,ABCB1B,ABCB8,ABCG2,PSMC4,MYH14,DNHD1,ATP11A,SMARCA4,DDX19B,RECQL4,INO80,TAP1,ATP11B,ATP5L,ATP8B1,ABCB1A,DDX24,ABCA8A,ABCB4,ATP8B4,HSPA1A
ATPase activity, coupled to movement of substances	0.00155	133	993	21	15.8	MF	ATP4A,ABCA1,ATP5G3,ATP6V0A1,ATP5C1,ABCA2,ABCB11,ATP9A,ATP6V0D2,ABCB1B,ABCB8,ABCG2,ATP11A,TAP1,ATP11B,ATP5L,ATP8B1,ABCB1A,ABCA8A,ABCB4,ATP8B4
phospholipid-translocating ATPase activity	0.00856	22	993	8	36.4	MF	ABCA1,ATP9A,ATP11A,ATP11B,ATP8B1,ABCB1A,ABCB4,ATP8B4
